# Supplementary material for: Rhodium-catalyzed asymmetric arylation of N- and O-containing cyclic aldimines: facile and efficient access to highly optically active 3,4-dihydrobenzo[1,4]oxazin-2-ones and dihydroquinoxalinones
Source: Royal Society of Chemistry journal article supplement (doi:10.1039/c6qo00191b), 2016-01-01

Supplementary Information for:

**Rhodium-catalyzed asymmetric arylation of *N*- and *O*-containing cyclic  
aldimines: facile and efficient access to highly optically active  
3,4-dihydrobenzo[1,4]oxazin-2-ones and dihydroquinoxalinones**

Xu Zhang,<sup>a,b</sup> Bin Xu,<sup>a,\*</sup> Ming-Hua Xu<sup>b,\*</sup>

<sup>a</sup>*Department of Chemistry, Innovative Drug Research Center, Shanghai University, Shanghai 200444,*  
*and* <sup>b</sup>*State Key Laboratory of Drug Research, Shanghai Institute of Materia Medica, Chinese Academy*  
*of Sciences, Shanghai 2010203, China*

|                                                                                                                 |    |
|-----------------------------------------------------------------------------------------------------------------|----|
| 1. General .....                                                                                                | 2  |
| 2. General procedure for Rh-catalyzed asymmetric arylation of benzoxazinones <b>1</b> .....                     | 3  |
| 3. General procedure for Rh-catalyzed asymmetric arylation of quinoxalinones <b>3</b> .....                     | 3  |
| 4. Characterization data and HPLC chromatogram of products <b>3a-q</b> , <b>5a-l</b> .....                      | 4  |
| 5. Synthesis of benzomorpholine <b>6</b> , tetrahydroquinoxaline <b>7</b> and aryl glycine amide <b>8</b> ..... | 31 |
| 6. Characterization data and HPLC chromatogram of derivative <b>6</b> , <b>7</b> , <b>8</b> .....               | 32 |
| 7. Crystallographic analysis of <b>3g</b> .....                                                                 | 36 |
| 8. Copies of <sup>1</sup> H NMR and <sup>13</sup> C NMR spectra .....                                           | 37 |

## 1. General

Solvents were dried and distilled by standard procedures. NMR spectra were recorded on Varian spectrometers (300 MHz for  $^1\text{H}$ ; 126 MHz, 151 MHz for  $^{13}\text{C}$ ). Chemical shifts are reported in  $\delta$  ppm referenced to an internal  $\text{SiMe}_4$  standard for  $^1\text{H}$  NMR and chloroform-d ( $\delta$  77.16) for  $^{13}\text{C}$  NMR. Chiral HPLC was performed on a JASCO 2000 instrument by using Daicel chiral columns with 2-propanol/hexane as the eluent at 254 nm. High Resolution Mass Spectra (HRMS) were recorded on an Orbitrap mass spectrometer with ESI resource. Optical rotation were measured using a Rudolph Autopol VI Automatic Polarimeter. benzoxazinones **1**<sup>1</sup> and quinoxalinones **3**<sup>2</sup> were prepared according to the known literatures.

## 2. General procedure for Rh-catalyzed asymmetric arylation of benzoxazinones 1:

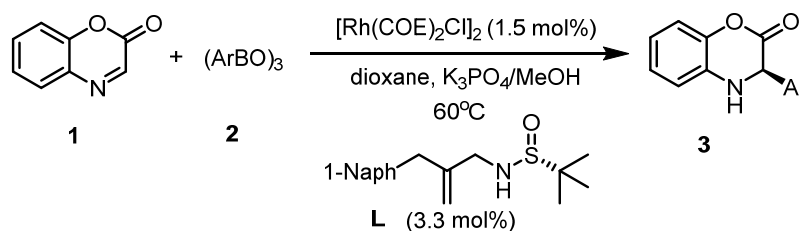

Under Ar atmosphere, benzoxazinones **1** (0.1 mmol), arylboroxine **2** (1.2 mmol),  $[\text{Rh}(\text{COE})_2\text{Cl}]_2$  (1.1 mg, 0.003 of Rh), **L2** (1.0 mg, 0.0033 mmol) and anhydrous  $\text{K}_3\text{PO}_4$  in 1.0 mL of anhydrous dioxane was stirred at room temperature for 30 min. To this mixture was added absolute methanol (16  $\mu\text{L}$ , 0.4 mmol). After being stirred at  $60^\circ\text{C}$  for 2-12 h, a saturated aq.  $\text{NH}_4\text{Cl}$  was added and the mixture was extracted with EtOAc (10 mL $\times$ 3). The combined organic phase was dried over  $\text{Na}_2\text{SO}_4$ , filtered, and concentrated. The residue was purified by silica gel flash chromatography, eluting with petroleum ether/EtOAc (10–30% EtOAc), to afford the corresponding products **3**.

## 3. General procedure for Rh-catalyzed asymmetric arylation of quinoxalinones 3:

Under Ar atmosphere, quinoxalinones **4** (0.1 mmol), arylboroxine **2** (1.2 mmol),  $[\text{Rh}(\text{COE})_2\text{Cl}]_2$  (1.1 mg, 0.003 of Rh), **L2** (1.0 mg, 0.0033 mmol) and anhydrous  $\text{K}_3\text{PO}_4$  in 1.0 mL of anhydrous dioxane was stirred at room temperature for 30 min. To this mixture was added absolute methanol (16  $\mu\text{L}$ , 0.4 mmol). After being stirred at  $60^\circ\text{C}$  for 2-12 h, a saturated aq.  $\text{NH}_4\text{Cl}$  was added and the mixture was extracted with EtOAc (10 mL $\times$ 3). The combined organic phase was dried over  $\text{Na}_2\text{SO}_4$ , filtered, and concentrated. The residue was purified by silica gel flash chromatography, eluting with petroleum ether/EtOAc (10–30% EtOAc), to afford the corresponding products **5**.

#### 4. Characterization data and HPLC chromatogram of products 3a-q, 5a-k

##### (*R*)-3-phenyl-3,4-dihydro-2*H*-benzo[*b*][1,4]oxazin-2-one (**3a**):

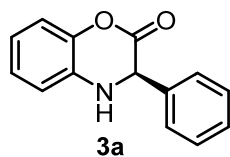

White solid, 93% yield, 99.9% ee

$[\alpha]_D^{20} = -110.4$  (*c* 0.80, CHCl<sub>3</sub>) [Lit.<sup>3</sup>:  $[\alpha]_D^{20} = +106.5$  (*c* 0.40, CHCl<sub>3</sub>) for 97% ee]; <sup>1</sup>H NMR (300 MHz, CDCl<sub>3</sub>):  $\delta$  7.36-7.41 (m, 5H), 7.00-7.07 (m, 2H),

6.81-6.90 (m, 2H), 5.06 (d, *J* = 1.8 Hz, 1H), 4.26 (s, 1H).

HPLC analysis: Chiralpak AD-H column (250 mm); detected at 254 nm; hexane/<sup>i</sup>PrOH = 80/20;

flow = 0.7 mL/min; Retention time: 15.9 min, 29.8 min (major).

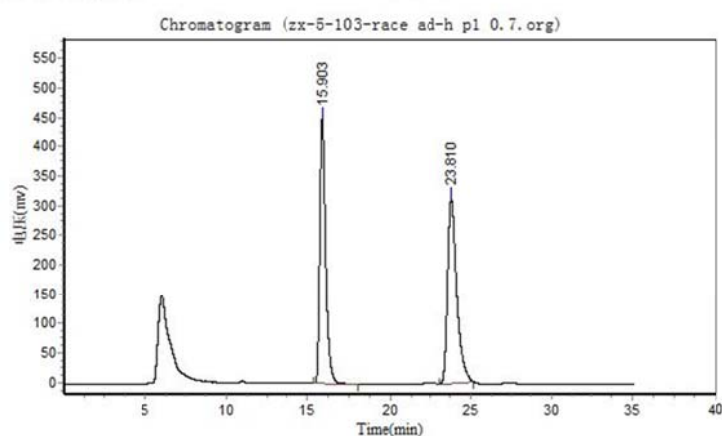

##### Results

| Peak No.     | Peak ID | Ret Time | Height     | Area         | Conc.    |
|--------------|---------|----------|------------|--------------|----------|
| 1            |         | 15.903   | 451509.844 | 11176821.000 | 47.8303  |
| 2            |         | 23.810   | 312812.781 | 12190820.000 | 52.1697  |
| <b>Total</b> |         |          | 764322.625 | 23367641.000 | 100.0000 |

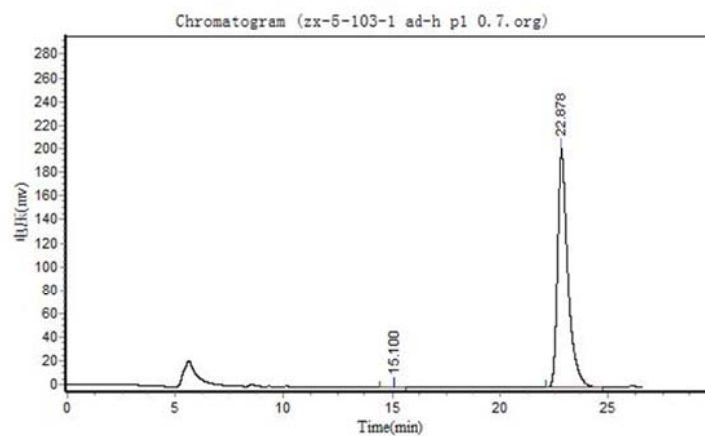

##### Results

| Peak No.     | Peak ID | Ret Time | Height     | Area        | Conc.    |
|--------------|---------|----------|------------|-------------|----------|
| 1            |         | 15.100   | 325.838    | 3466.810    | 0.0490   |
| 2            |         | 22.878   | 201973.984 | 7068321.000 | 99.9510  |
| <b>Total</b> |         |          | 202299.822 | 7071787.810 | 100.0000 |

**(R)-3-(4-methoxyphenyl)-3,4-dihydro-2H-benzo[b][1,4]oxazin-2-one (3b)<sup>3</sup>:**

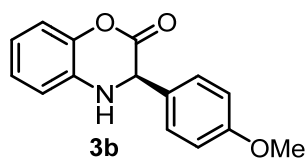

White solid, 98% yield, 99.9% ee.

$[\alpha]_D^{20} = -81.4$  (c 0.70, CHCl<sub>3</sub>) [Lit.<sup>3</sup>:  $[\alpha]_D^{20} = +69.0$  (c 0.20, CHCl<sub>3</sub>)

for 80% ee]; <sup>1</sup>H NMR (300 MHz, CDCl<sub>3</sub>): δ 7.32 (d, *J* = 8.6 Hz, 2H), 6.99-7.06 (m, 2H), 6.79-6.91 (m, 4H), 5.00 (d, *J* = 1.6 Hz, 1H), 4.20 (s, 1H), 3.80 (s, 3H);

HPLC analysis: Chiralcel OD-H column (250 mm); detected at 254 nm; hexane/<sup>i</sup>PrOH = 70/30;

flow = 0.7 mL/min; Retention time: 11.3 min (major), 26.6 min.

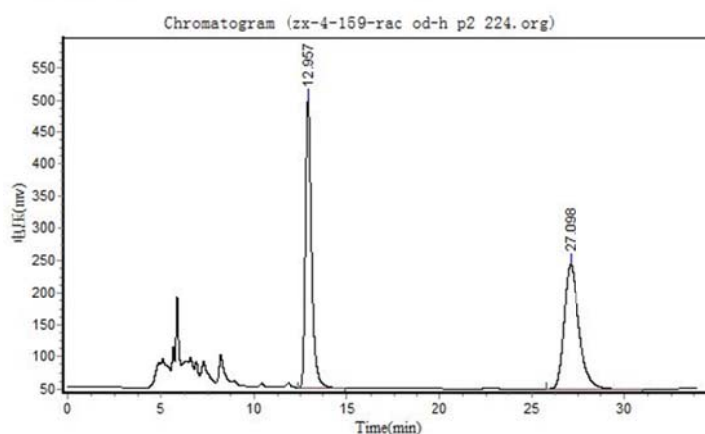

**Results**

| Peak No.     | Peak ID | Ret Time | Height     | Area         | Conc.    |
|--------------|---------|----------|------------|--------------|----------|
| 1            |         | 12.957   | 447704.156 | 10208748.000 | 48.2649  |
| 2            |         | 27.098   | 193306.578 | 10942735.000 | 51.7351  |
| <b>Total</b> |         |          | 641010.734 | 21151483.000 | 100.0000 |

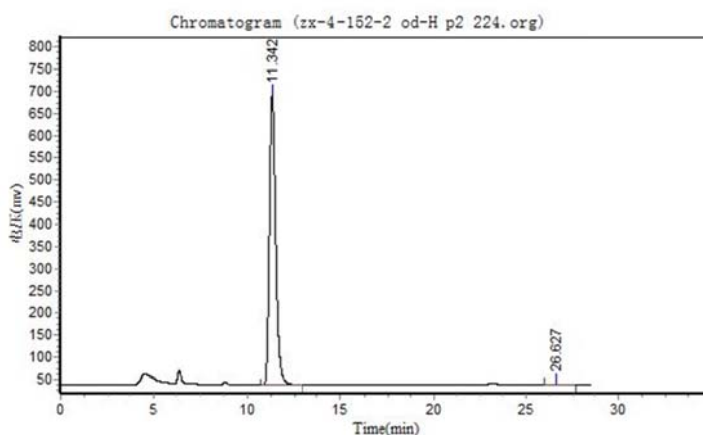

**Results**

| Peak No.     | Peak ID | Ret Time | Height     | Area         | Conc.    |
|--------------|---------|----------|------------|--------------|----------|
| 1            |         | 11.342   | 653779.125 | 15233951.000 | 99.9706  |
| 2            |         | 26.627   | 91.583     | 4472.408     | 0.0293   |
| <b>Total</b> |         |          | 653870.708 | 15238423.408 | 100.0000 |

**(R)-3-p-tolyl-3,4-dihydro-2H-benzo[b][1,4]oxazin-2-one (3c)<sup>3</sup>:**

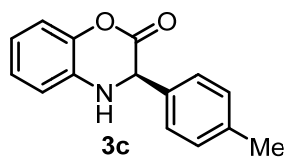

White solid, 98% yield, 99.9% ee.

$[\alpha]_D^{20} = -93.2$  (*c* 0.80, CHCl<sub>3</sub>) [Lit.<sup>3</sup>:  $[\alpha]_D^{20} = +85.0$  (*c* 0.40, CHCl<sub>3</sub>) for

86% ee]; <sup>1</sup>H NMR (300 MHz, CDCl<sub>3</sub>): δ 7.28 (d, *J* = 8.1 Hz, 2H), 7.17 (d, *J* = 8.0 Hz, 2H), 7.00-7.05 (m, 2H), 6.78-6.89 (m, 2H), 4.98 (d, *J* = 1.4 Hz, 1H), 4.30 (s, 1H), 2.34 (s, 3H);

HPLC analysis: Chiralcel OD-H column (250 mm); detected at 254 nm; hexane/<sup>n</sup>PrOH = 70/30; flow = 0.7 mL/min; Retention time: 9.7 min (major), 30.3 min.

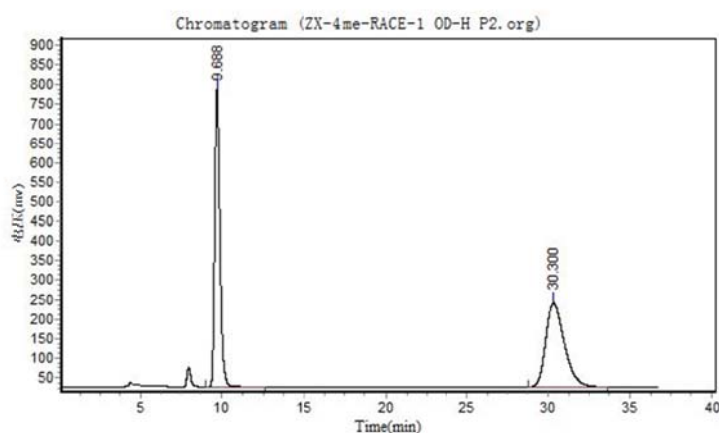

**Results**

| Peak No.     | Peak ID | Ret Time | Height     | Area         | Conc.    |
|--------------|---------|----------|------------|--------------|----------|
| 1            |         | 9.688    | 758634.250 | 16673702.000 | 49.9349  |
| 2            |         | 30.300   | 213493.000 | 16717189.000 | 50.0651  |
| <b>Total</b> |         |          | 972127.250 | 33390891.000 | 100.0000 |

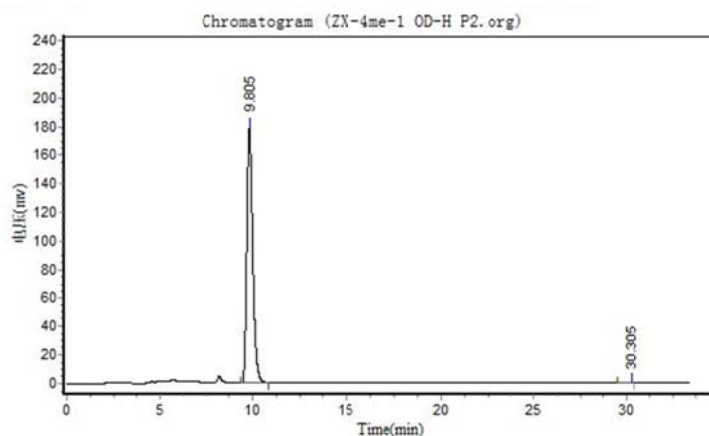

**Results**

| Peak ID | Ret Time | Height     | Area        | Conc.    |
|---------|----------|------------|-------------|----------|
|         | 9.805    | 178065.625 | 3878077.000 | 99.9920  |
|         | 30.305   | 11.207     | 312.100     | 0.0080   |
|         |          | 178076.832 | 3878389.100 | 100.0000 |

**(R)-3-(4-fluorophenyl)-3,4-dihydro-2H-benzo[b][1,4]oxazin-2-one (3d)<sup>3</sup>:**

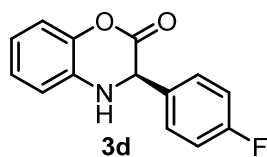

White solid, 94% yield, 99.3% ee.

$[\alpha]_D^{20} = -105.2$  ( $c$  0.80,  $\text{CHCl}_3$ ) [Lit.<sup>3</sup>:  $[\alpha]_D^{20} = +107.0$  ( $c$  0.20,  $\text{CHCl}_3$ )

for 89% ee];  $^1\text{H NMR}$  (300 MHz,  $\text{CDCl}_3$ )  $\delta$  7.39 (d,  $J = 8.3$ , 2H), 7.02-7.08 (m, 4H), 6.86-6.90 (m, 1H), 6.82 (m, 1H), 5.02 (d,  $J = 1.7\text{Hz}$  1H), 4.29 (s, 1H);

HPLC analysis: Chiralcel OD-H column (250 mm); detected at 254 nm; hexane/ $i$ PrOH = 80/20; flow = 0.7 mL/min; Retention time: 11.3 min (major), 21.0 min.

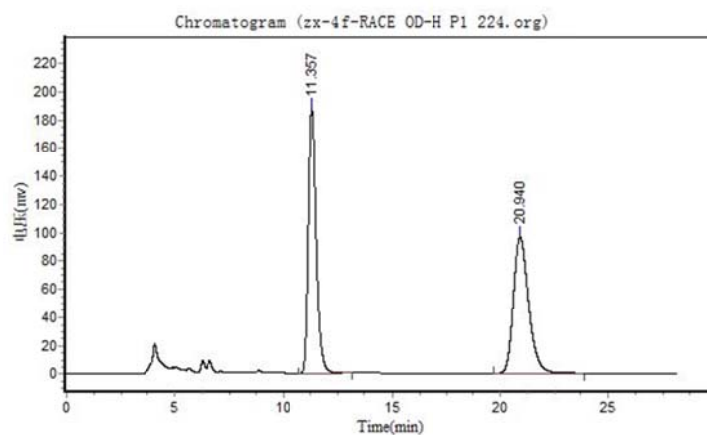

| Results      |         |          |            |             |          |
|--------------|---------|----------|------------|-------------|----------|
| Peak No.     | Peak ID | Ret Time | Height     | Area        | Conc.    |
| 1            |         | 11.357   | 187308.141 | 4708463.500 | 50.2722  |
| 2            |         | 20.940   | 96326.992  | 4657471.000 | 49.7278  |
| <b>Total</b> |         |          | 283635.133 | 9365934.500 | 100.0000 |

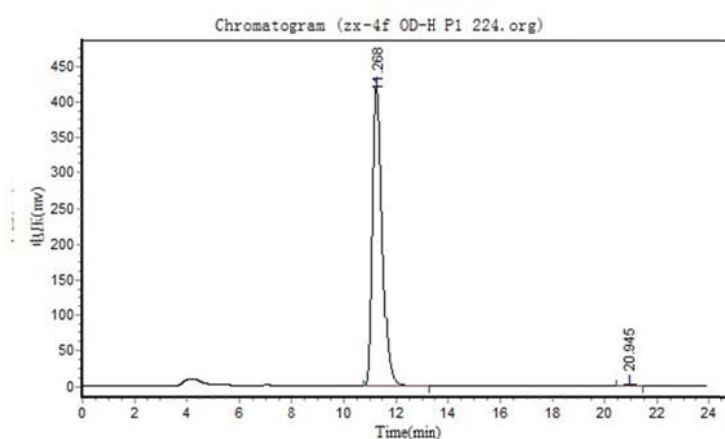

| Results      |         |          |            |              |          |
|--------------|---------|----------|------------|--------------|----------|
| Peak No.     | Peak ID | Ret Time | Height     | Area         | Conc.    |
| 1            |         | 11.268   | 418816.281 | 10598792.000 | 99.6411  |
| 2            |         | 20.945   | 1116.264   | 38170.852    | 0.3589   |
| <b>Total</b> |         |          | 419932.545 | 10636962.852 | 100.0000 |

**(R)-3-(3-methoxyphenyl)-3,4-dihydro-2H-benzo[b][1,4]oxazin-2-one (3e):**

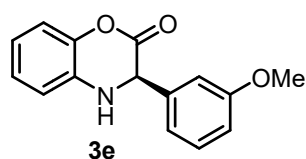

White solid, 98% yield, 99.9% ee.

$[\alpha]_D^{20} = -112.3$  (*c* 0.85,  $\text{CHCl}_3$ );  $^1\text{H NMR}$  (300 MHz,  $\text{CDCl}_3$ )  $\delta$  7.32-7.23 (m, 1H), 7.07-6.93 (m, 4H), 6.90-6.77 (m, 3H), 5.04 (s, 1H), 4.30 (s, 1H), 3.77 (s, 3H);  $^{13}\text{C NMR}$  (151 MHz,  $\text{CDCl}_3$ )  $\delta$  165.1, 160.0, 140.9, 137.8, 132.3, 130.0, 125.2, 120.4, 119.7, 117.0, 114.9, 114.5, 112.9, 59.2, 55.3; ESI-HRMS exact mass calculated  $\text{C}_{15}\text{H}_{13}\text{NO}_3$  for  $[\text{M}+\text{H}^+]$  256.0968, found 256.0962;

HPLC analysis: Chiralcel OD-H column (250 mm); detected at 254 nm; hexane/ $\text{PrOH} = 70/30$ ; flow = 0.7 mL/min; Retention time: 13.8 min (major), 21.4 min.

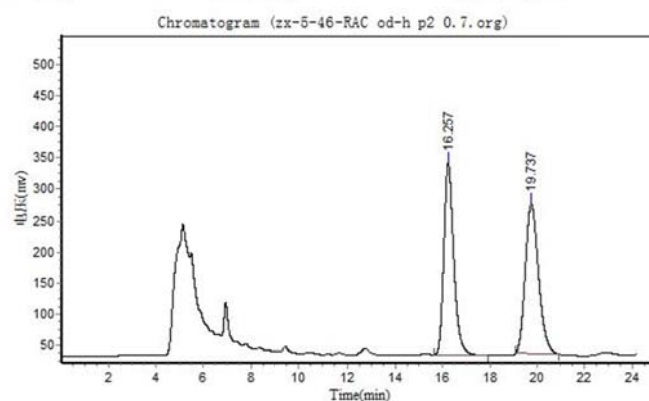

**Results**

| Peak No.     | Peak ID | Ret Time | Height     | Area         | Conc.    |
|--------------|---------|----------|------------|--------------|----------|
| 1            |         | 16.257   | 307251.469 | 8791903.000  | 48.8659  |
| 2            |         | 19.737   | 239444.688 | 9199981.000  | 51.1341  |
| <b>Total</b> |         |          | 546696.156 | 17991884.000 | 100.0000 |

Quantification: Area/Area%

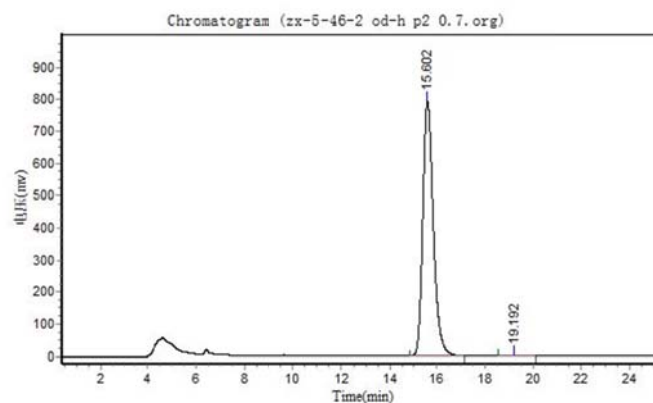

**Results**

| Peak No.     | Peak ID | Ret Time | Height     | Area         | Conc.    |
|--------------|---------|----------|------------|--------------|----------|
| 1            |         | 15.602   | 793814.000 | 24049016.000 | 99.8337  |
| 2            |         | 19.192   | 1188.766   | 40051.055    | 0.1663   |
| <b>Total</b> |         |          | 795002.766 | 24089067.055 | 100.0000 |



**(R)-3-(3-methoxyphenyl)-3,4-dihydro-2H-benzo[b][1,4]oxazin-2-one (3f):**

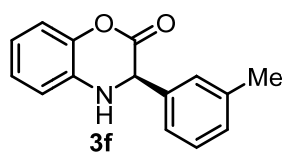

White solid, 96% yield, 99.9% ee.

$[\alpha]_D^{20} = -95.2$  (*c* 0.70, CHCl<sub>3</sub>); <sup>1</sup>H NMR (300 MHz, CDCl<sub>3</sub>) δ 7.31-7.14 (m, 4H), 7.04 (m, 2H), 6.91-6.77 (m, 2H), 5.03 (d, *J* = 3.7 Hz, 1H),

4.23 (s, 1H), 2.35 (s, 3H). <sup>13</sup>C NMR (151 MHz, CDCl<sub>3</sub>) δ 165.3, 140.9, 138.8, 136.3, 132.4, 129.8, 128.9, 128.2, 125.1, 124.5, 120.2, 117.0, 114.8, 59.3, 21.4; ESI-HRMS exact mass calculated C<sub>15</sub>H<sub>13</sub>NO<sub>2</sub> for [M+Na<sup>+</sup>] 262.0838, found 262.0834;

HPLC analysis: Chiralcel OD-H column (250 mm); detected at 254 nm; hexane/PrOH = 80/20; flow = 0.7 mL/min; Retention time: 16.2 min (major), 19.7 min.

Column Temp: Prog. Temp.

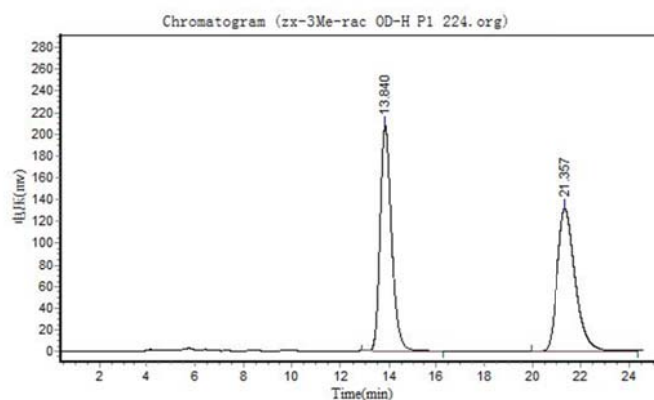

**Results**

| Peak No.     | Peak ID | Ret Time | Height     | Area         | Conc.    |
|--------------|---------|----------|------------|--------------|----------|
| 1            |         | 13.840   | 206787.266 | 6813298.000  | 50.0907  |
| 2            |         | 21.357   | 131135.234 | 6788620.000  | 49.9093  |
| <b>Total</b> |         |          | 337922.500 | 13601918.000 | 100.0000 |

Column Temp: Prog. Temp.

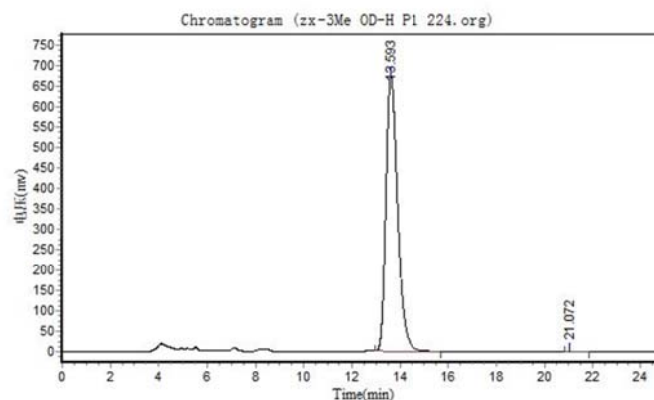

**Results**

| Peak No.     | Peak ID | Ret Time | Height     | Area         | Conc.    |
|--------------|---------|----------|------------|--------------|----------|
| 1            |         | 13.593   | 672353.875 | 22707044.000 | 99.9844  |
| 2            |         | 21.072   | 116.220    | 3550.502     | 0.0156   |
| <b>Total</b> |         |          | 672470.095 | 22710594.502 | 100.0000 |

**(R)-3-(3-bromophenyl)-3,4-dihydro-2H-benzo[b][1,4]oxazin-2-one (3g)**

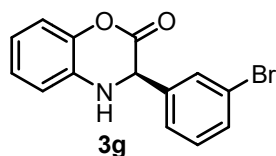

White solid, 33% yield, 99.7% ee.

$[\alpha]_D^{20} = -94.8$  (*c* 0.80, CHCl<sub>3</sub>); <sup>1</sup>H NMR (300 MHz, CDCl<sub>3</sub>) δ 7.59 (s, 1H), 7.50 (dd, *J* = 7.9, 1.6 Hz, 1H), 7.38-7.22 (m, 2H), 7.06 (m, 2H),

6.93-6.81 (m, 2H), 5.04 (d, *J* = 2.1 Hz, 1H), 4.26 (s, 1H). <sup>13</sup>C NMR (151 MHz, CDCl<sub>3</sub>) δ 164.6, 140.8, 138.4, 132.2, 132.0, 130.7, 130.5, 126.3, 125.3, 123.0, 120.7, 117.1, 115.0, 58.7;

ESI-HRMS exact mass calculated C<sub>14</sub>H<sub>10</sub>BrNO<sub>2</sub> for [M+H<sup>+</sup>] 303.9803, found 303.9804;

HPLC analysis: Chiralpak AD-H column (250 mm); detected at 254 nm; hexane/<sup>i</sup>PrOH = 80/20;

flow = 0.7 mL/min; Retention time: 11.7 min, 13.9 min (major).

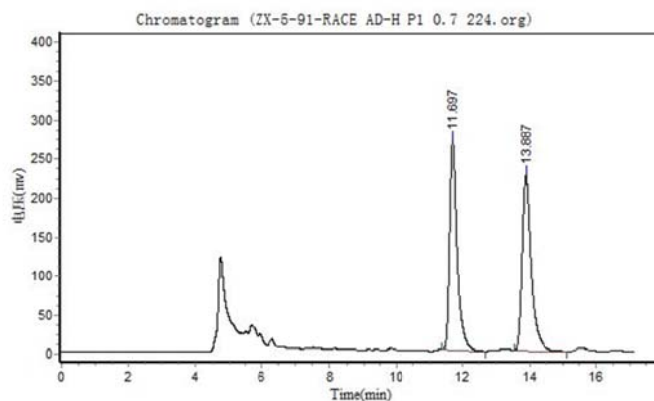

**Results**

| Peak No.     | Peak ID | Ret Time | Height     | Area        | Conc.    |
|--------------|---------|----------|------------|-------------|----------|
| 1            |         | 11.697   | 268107.469 | 4176594.500 | 49.5698  |
| 2            |         | 13.887   | 223315.188 | 4249093.500 | 50.4302  |
| <b>Total</b> |         |          | 491422.656 | 8425688.000 | 100.0000 |

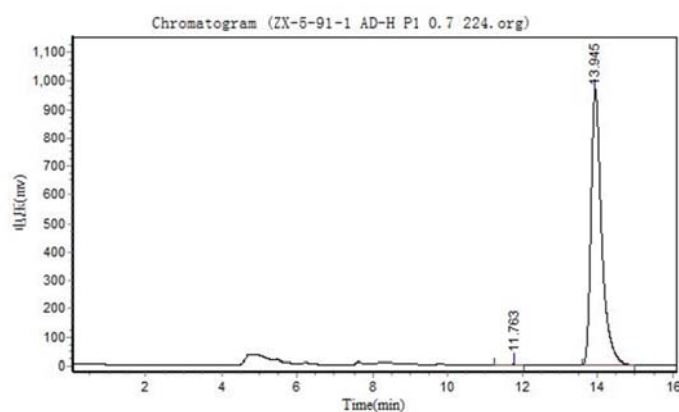

**Results**

| Peak No.     | Peak ID | Ret Time | Height     | Area         | Conc.    |
|--------------|---------|----------|------------|--------------|----------|
| 1            |         | 11.763   | 2130.996   | 36503.055    | 0.1962   |
| 2            |         | 13.945   | 964240.313 | 18569538.000 | 99.8038  |
| <b>Total</b> |         |          | 966371.308 | 18606041.055 | 100.0000 |

**(R)-3-(2-methoxyphenyl)-3,4-dihydro-2H-benzo[b][1,4]oxazin-2-one (3h):**

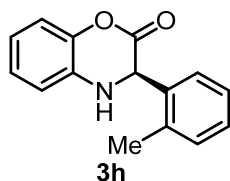

White solid, 99% yield, 99.7% ee.

$[\alpha]_D^{20} = -81.5$  (*c* 0.75, CHCl<sub>3</sub>); <sup>1</sup>H NMR (300 MHz, CDCl<sub>3</sub>) δ 7.41 (d, *J* = 7.4 Hz, 1H), 7.27 (m, 3H), 7.13-7.00 (m, 2H), 6.94-6.86 (m, 1H), 6.81-6.75 (m, 1H), 5.18 (d, *J* = 1.8 Hz, 1H), 4.11 (s, 1H), 2.43 (s, 3H). <sup>13</sup>C NMR (151

MHz, CDCl<sub>3</sub>) δ 165.5, 141.1, 137.1, 134.6, 133.2, 131.2, 129.0, 127.9, 126.5, 125.2, 120.3, 117.0, 114.8, 57.1, 19.6; ESI-HRMS exact mass calculated C<sub>15</sub>H<sub>13</sub>NO<sub>2</sub> for [M+Na<sup>+</sup>] 262.0838, found 262.0834;

HPLC analysis: Chiralpak AD-H column (250 mm); detected at 254 nm; hexane/<sup>i</sup>PrOH = 80/20; flow = 0.7 mL/min; Retention time: 10.2 min, 13.7 min (major).

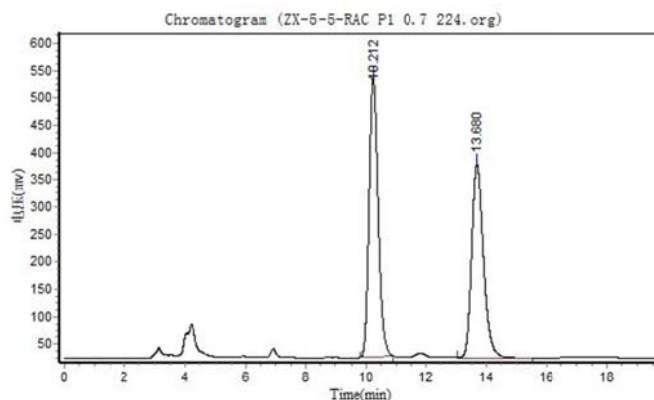

**Results**

| Peak No.     | Peak ID | Ret Time | Height     | Area         | Conc.    |
|--------------|---------|----------|------------|--------------|----------|
| 1            |         | 10.212   | 510654.906 | 10613470.000 | 52.6320  |
| 2            |         | 13.680   | 353922.906 | 9551969.000  | 47.3680  |
| <b>Total</b> |         |          | 864577.813 | 20165439.000 | 100.0000 |

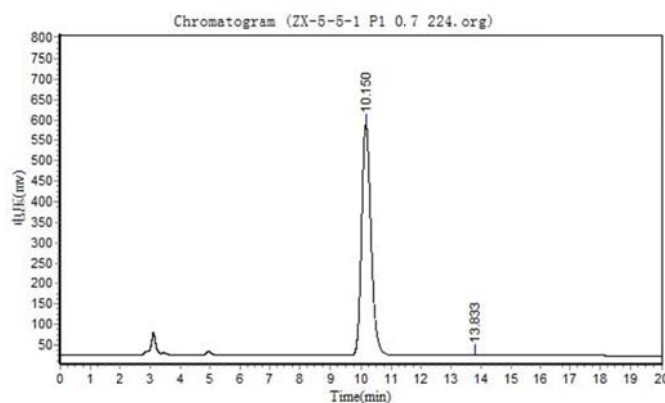

**Results**

| Peak No.     | Peak ID | Ret Time | Height     | Area         | Conc.    |
|--------------|---------|----------|------------|--------------|----------|
| 1            |         | 10.150   | 564076.438 | 12129605.000 | 99.8530  |
| 2            |         | 13.833   | 723.930    | 17852.875    | 0.1470   |
| <b>Total</b> |         |          | 564800.368 | 12147457.875 | 100.0000 |

**(R)-3-(2-fluorophenyl)-3,4-dihydro-2H-benzo[b][1,4]oxazin-2-one (3i):**

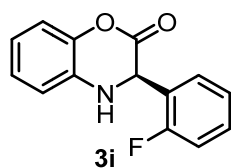

White solid, 77% yield, 99.4% ee.

$[\alpha]_D^{20} = -74.1$  (*c* 0.50, CHCl<sub>3</sub>); <sup>1</sup>H NMR (300 MHz, CDCl<sub>3</sub>) δ 7.45-7.31 (m, 2H), 7.13-7.2 (m, 2H), 7.02 (dd, *J* = 8.2, 6.8 Hz, 1H), 6.93-6.85 (m, 1H), 6.71-6.81 (m, 1H), 5.36 (d, *J* = 1.7 Hz, 1H), 4.18 (s, 1H). <sup>13</sup>C NMR (151

MHz, CDCl<sub>3</sub>) δ 164.4, 160.7 (d, *J* = 249 Hz), 141.1, 132.3, 130.9, 130.8, 128.7, 128.7, 125.2,

124.7, 124.6, 123.6 (d, *J* = 13.6 Hz), 120.7, 117.0, 116.0 (d, *J* = 21 Hz), 115.1, 53.4 (d, *J* = 3 Hz);

ESI-HRMS exact mass calculated C<sub>15</sub>H<sub>10</sub>FNO<sub>2</sub> for [M+Na<sup>+</sup>] 266.0588, found 266.0586;

HPLC analysis: Chiralcel OD-H column (250 mm); detected at 254 nm; hexane/PrOH = 80/20;

flow = 0.7 mL/min; Retention time: 11.9 min (major), 13.4 min.

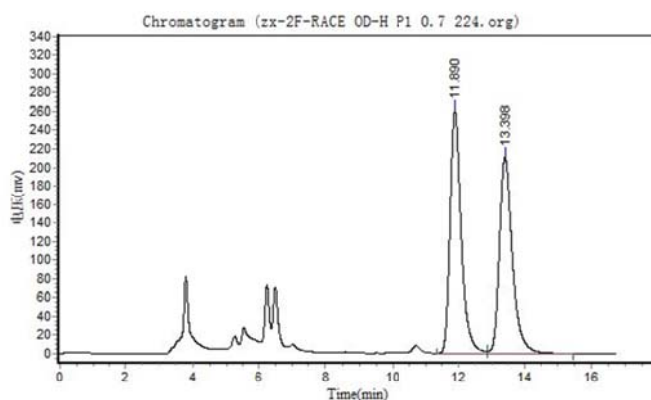

**Results**

| Peak No.     | Peak ID | Ret Time | Height     | Area         | Conc.    |
|--------------|---------|----------|------------|--------------|----------|
| 1            |         | 11.890   | 260765.922 | 6057864.000  | 51.4964  |
| 2            |         | 13.398   | 210748.219 | 5705810.500  | 48.5036  |
| <b>Total</b> |         |          | 471514.141 | 11763674.500 | 100.0000 |

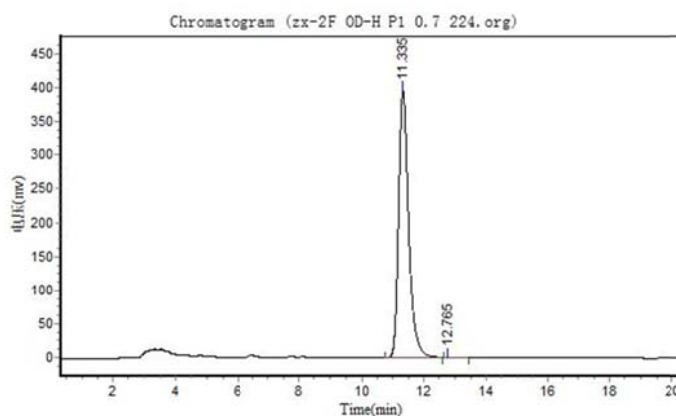

**Results**

| Peak No.     | Peak ID | Ret Time | Height     | Area        | Conc.    |
|--------------|---------|----------|------------|-------------|----------|
| 1            |         | 11.335   | 393731.156 | 8832826.000 | 99.9949  |
| 2            |         | 12.765   | 176.649    | 452.901     | 0.0051   |
| <b>Total</b> |         |          | 393907.806 | 8833278.901 | 100.0000 |

**(R)-3-(thiophen-3-yl)-3,4-dihydro-2H-benzo[b][1,4]oxazin-2-one (3j):**

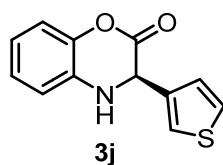

White solid, 99% yield, 99.3% ee.

$[\alpha]_D^{20} = -54.3$  (*c* 0.50, CHCl<sub>3</sub>); <sup>1</sup>H NMR (300 MHz, CDCl<sub>3</sub>) δ 7.35-7.26 (m, 2H), 7.10-7.00(m, 3H), 6.91-6.81 (m, 2H), 5.20 (s, 1H), 4.31 (s, 1H); <sup>13</sup>C NMR (151 MHz, CDCl<sub>3</sub>) δ 164.6, 140.9, 137.0, 132.0, 127.1, 126.3, 125.3,

123.7, 120.6, 117.0, 115.1, 55.3; ESI-HRMS exact mass calculated C<sub>12</sub>H<sub>9</sub>NO<sub>2</sub>S for [M+Na<sup>+</sup>] 254.0246, found 254.0247;

HPLC analysis: Chiralcel OD-H column (250 mm); detected at 254 nm; hexane/PrOH = 80/20; flow = 0.7 mL/min; Retention time: 14.7 min (major), 19.3 min.

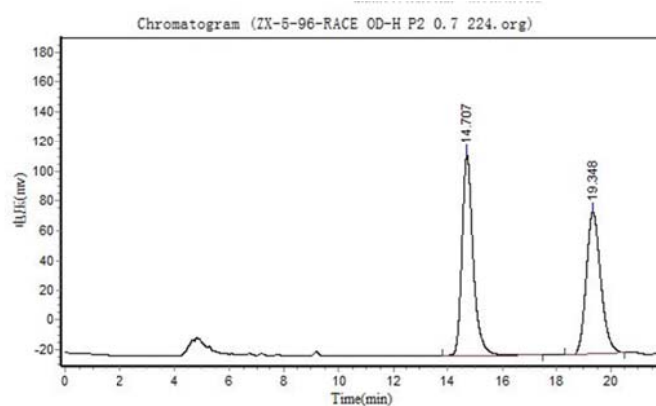

| Results      |         |          |            |             |          |
|--------------|---------|----------|------------|-------------|----------|
| Peak No.     | Peak ID | Ret Time | Height     | Area        | Conc.    |
| 1            |         | 14.707   | 134414.572 | 3805203.000 | 51.6166  |
| 2            |         | 19.348   | 96007.695  | 3568854.750 | 48.3834  |
| <b>Total</b> |         |          | 230422.367 | 7372057.750 | 100.0000 |

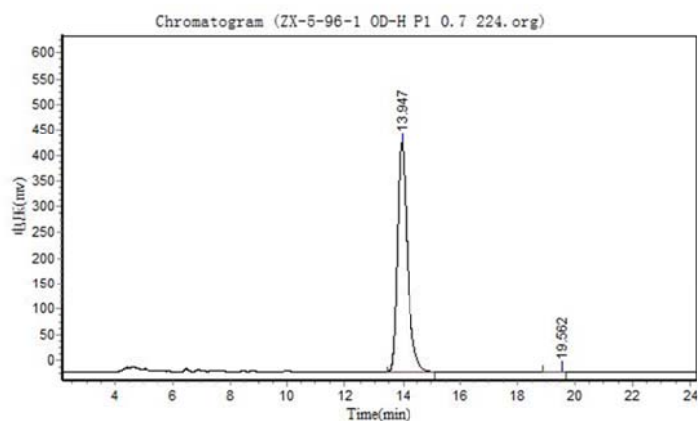

| Results      |         |          |            |              |          |
|--------------|---------|----------|------------|--------------|----------|
| Peak No.     | Peak ID | Ret Time | Height     | Area         | Conc.    |
| 1            |         | 13.947   | 446411.844 | 11056558.000 | 99.9968  |
| 2            |         | 19.562   | 72.622     | 353.400      | 0.0032   |
| <b>Total</b> |         |          | 446484.466 | 11056911.400 | 100.0000 |

**(R)-3-(naphthalen-2-yl)-3,4-dihydro-2H-benzo[b][1,4]oxazin-2-one (3k):**

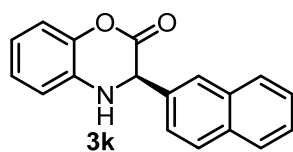

White solid, 90% yield, 99.9% ee

$[\alpha]_D^{20} = -75.3$  ( $c$  0.70,  $\text{CHCl}_3$ );  $^1\text{H NMR}$  (300 MHz,  $\text{CDCl}_3$ ):  $\delta$

7.90-7.77 (m, 4H), 7.51 (m, 3H), 7.11-7.01 (m, 2H), 6.94-6.78 (m,

2H), 5.22 (d,  $J = 1.9$  Hz, 1H), 4.34 (s, 1H);  $^{13}\text{C NMR}$  (151 MHz,

$\text{CDCl}_3$ ):  $\delta$  165.2, 141.0, 133.6, 133.4, 133.1, 132.4, 129.0, 128.1, 127.8, 127.0, 126.7, 126.6, 125.2,

124.8, 120.5, 117.0, 114.9, 59.4; ESI-HRMS exact mass calculated  $\text{C}_{18}\text{H}_{13}\text{NO}_2$  for  $[\text{M}+\text{Na}^+]$

298.0838, found 298.0838;

HPLC analysis: Chiralcel OD-H column (250 mm); detected at 254 nm; hexane/ $\text{PrOH} = 70/30$ ;

flow = 0.7 mL/min; Retention time: 20.6 min (major), 33.1 min.

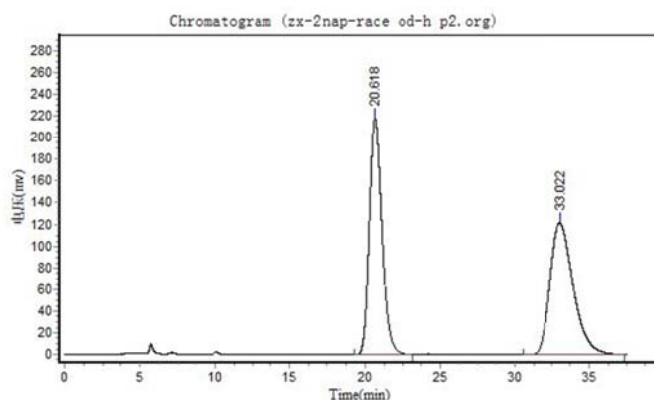

| Results      |         |          |            |              |          |
|--------------|---------|----------|------------|--------------|----------|
| Peak No.     | Peak ID | Ret Time | Height     | Area         | Conc.    |
| 1            |         | 20.618   | 217505.172 | 12742355.000 | 49.3224  |
| 2            |         | 33.022   | 121672.820 | 13092480.000 | 50.6776  |
| <b>Total</b> |         |          | 339177.992 | 25834835.000 | 100.0000 |

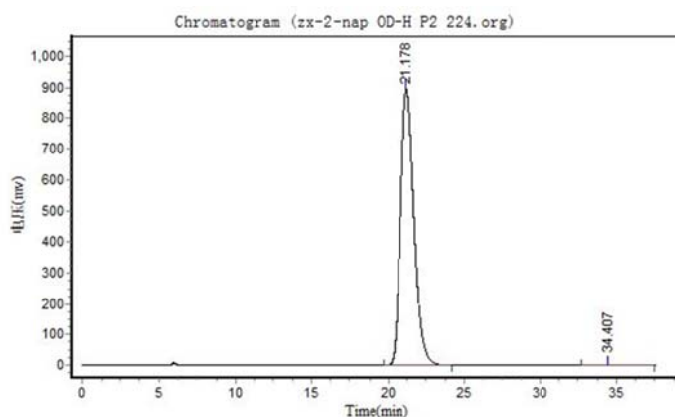

| Results      |         |          |            |              |          |
|--------------|---------|----------|------------|--------------|----------|
| Peak No.     | Peak ID | Ret Time | Height     | Area         | Conc.    |
| 1            |         | 21.178   | 893836.125 | 55554492.000 | 99.9482  |
| 2            |         | 34.407   | 221.477    | 28770.561    | 0.0518   |
| <b>Total</b> |         |          | 894077.602 | 55583262.561 | 100.0000 |

**(R)-3-(naphthalen-2-yl)-3,4-dihydro-2H-benzo[b][1,4]oxazin-2-one (31):**

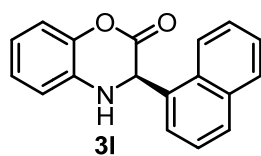

White solid, 99% yield, 99.5% ee

$[\alpha]_D^{20} = -28.5$  ( $c$  1.0,  $\text{CHCl}_3$ );  $^1\text{H NMR}$  (300 MHz,  $\text{CDCl}_3$ ):  $\delta$  8.19-8.12

(m, 1H), 7.94-7.85 (m, 2H), 7.59-7.39 (m, 4H), 7.17-6.88 (m, 3H), 6.76

-6.68 (m, 1H), 5.65 (d  $J = 1.8$ , 1H), 4.23 (s, 1H);  $^{13}\text{C NMR}$ : (151 MHz,  $\text{CDCl}_3$ )  $\delta$  165.4, 141.1,

134.2, 132.8, 131.8, 130.9, 130.0, 129.1, 126.8, 126.6, 126.1, 125.2, 125.2, 123.7, 120.4, 117.1,

114.9, 57.6; ESI-HRMS exact mass calculated  $\text{C}_{18}\text{H}_{13}\text{NO}_2$  for  $[\text{M}+\text{Na}^+]$  298.0838, found

298.0832;

HPLC analysis: Chiralcel OD-H column (250 mm); detected at 254 nm; hexane/ $i$ PrOH = 80/20;

flow = 0.7 mL/min; Retention time: 23.4 min (major), 27.8 min.

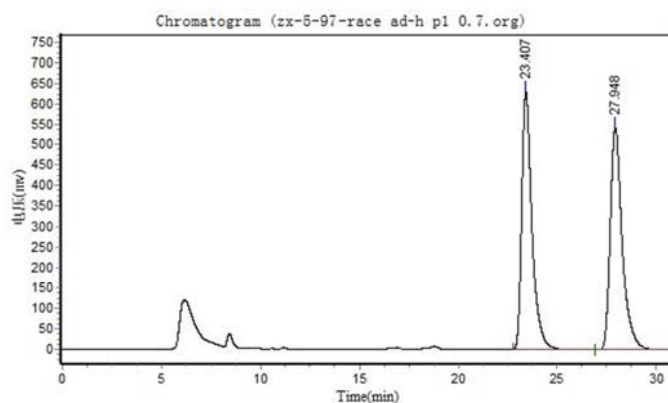

**Results**

| Peak No.     | Peak ID | Ret Time | Height      | Area         | Conc.    |
|--------------|---------|----------|-------------|--------------|----------|
| 1            |         | 23.407   | 632583.188  | 22903436.000 | 50.1603  |
| 2            |         | 27.948   | 544079.563  | 22757048.000 | 49.8397  |
| <b>Total</b> |         |          | 1176662.750 | 45660484.000 | 100.0000 |

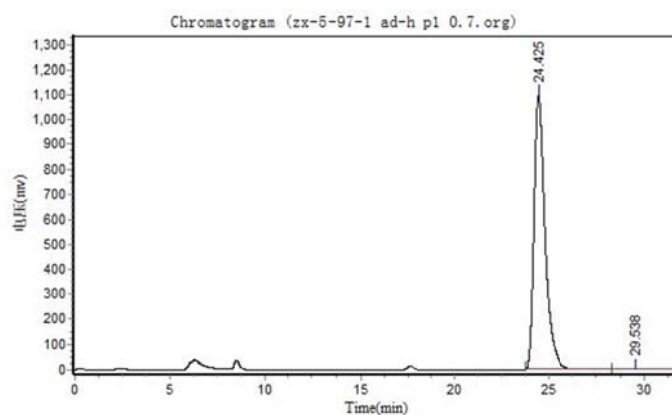

**Results**

| Peak No.     | Peak ID | Ret Time | Height      | Area         | Conc.    |
|--------------|---------|----------|-------------|--------------|----------|
| 1            |         | 24.425   | 1097013.750 | 43912980.000 | 99.6460  |
| 2            |         | 29.538   | 2770.197    | 156000.469   | 0.3540   |
| <b>Total</b> |         |          | 1099783.947 | 44068980.469 | 100.0000 |

**(R)-6-(tert-butyl)-3-phenyl-3,4-dihydro-2H-benzo[b][1,4]oxazin-2-one (3m)<sup>4</sup>:**

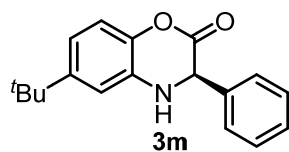

White solid, 98% yield, 99.8% ee

$[\alpha]_D^{20} = -110.2$  (*c* 0.90, CHCl<sub>3</sub>) [Lit.<sup>4</sup>:  $[\alpha]_D^{20} = +100.7$  (*c* 0.76, CHCl<sub>3</sub>)

for 98% ee]; <sup>1</sup>H NMR (300 MHz, CDCl<sub>3</sub>) δ 7.39 (m, 5H), 7.02-6.81

(m, 3H), 5.03 (s, 1H), 4.21 (s, 1H), 1.30 (s, 9H);

HPLC analysis: Chiralcel OD-H column (250 mm); detected at 254 nm; hexane/<sup>i</sup>PrOH = 70/30;

flow = 0.7 mL/min; Retention time: 7.5 min (major), 9.2 min.

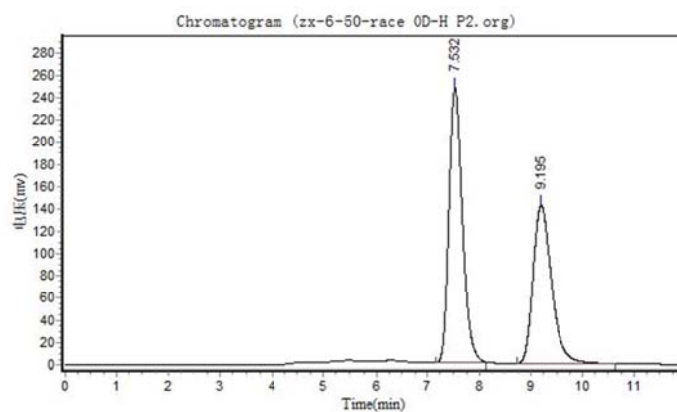

**Results**

| Peak No.     | Peak ID | Ret Time | Height     | Area        | Conc.    |
|--------------|---------|----------|------------|-------------|----------|
| 1            |         | 7.532    | 247042.547 | 4428020.000 | 55.2642  |
| 2            |         | 9.195    | 142327.297 | 3584438.000 | 44.7358  |
| <b>Total</b> |         |          | 389369.844 | 8012458.000 | 100.0000 |

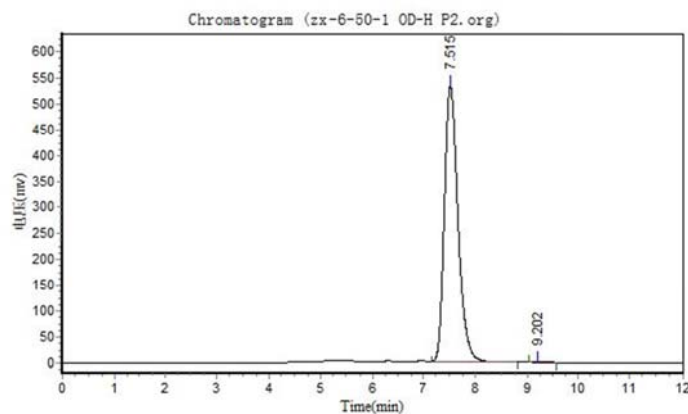

**Results**

| Peak No.     | Peak ID | Ret Time | Height     | Area        | Conc.    |
|--------------|---------|----------|------------|-------------|----------|
| 1            |         | 7.515    | 533018.438 | 9725139.000 | 99.9249  |
| 2            |         | 9.202    | 403.796    | 7310.501    | 0.0751   |
| <b>Total</b> |         |          | 533422.234 | 9732449.501 | 100.0000 |



**(R)-6-chloro-3-phenyl)-3,4-dihydro-2H-benzo[b][1,4]oxazin-2-one (3n)<sup>4</sup>:**

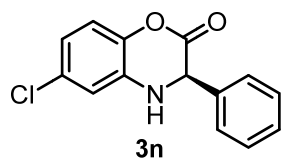

White solid, 98% yield, 99.7% ee.

$[\alpha]_D^{20} = -129.1$  (*c* 0.84, CHCl<sub>3</sub>) [Lit.<sup>4</sup>:  $[\alpha]_D^{20} = +125.2$  (*c* 0.84, CHCl<sub>3</sub>)

for 98% ee]; <sup>1</sup>H NMR (300 MHz, CDCl<sub>3</sub>): δ 7.38 (s, 5H), 6.96 (d, *J* =

8.5 Hz, 1H), 6.83 (dd, *J* = 8.3, 1.8 Hz, 2H), 5.08 (d, *J* = 1.9 Hz, 1H), 4.38 (s, 1H);

HPLC analysis: Chiralcel OD-H column (250 mm); detected at 254 nm; hexane/<sup>i</sup>PrOH = 80/20;

flow = 0.7 mL/min; Retention time: 14.5 min (major), 21.4 min.

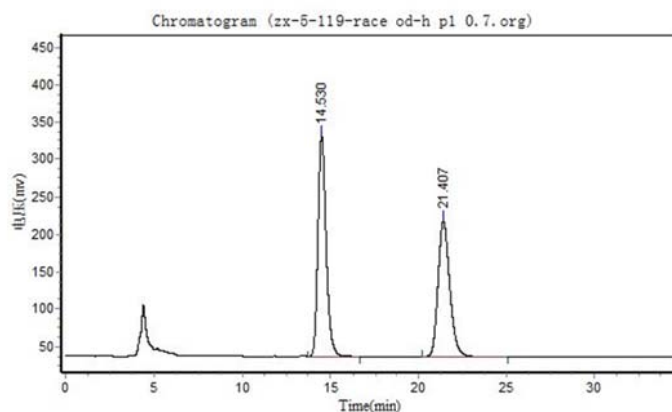

| Results      |         |          |            |              |          |
|--------------|---------|----------|------------|--------------|----------|
| Peak No.     | Peak ID | Ret Time | Height     | Area         | Conc.    |
| 1            |         | 14.530   | 294785.625 | 9507120.000  | 53.2171  |
| 2            |         | 21.407   | 181846.578 | 8357664.500  | 46.7829  |
| <b>Total</b> |         |          | 476632.203 | 17864784.500 | 100.0000 |

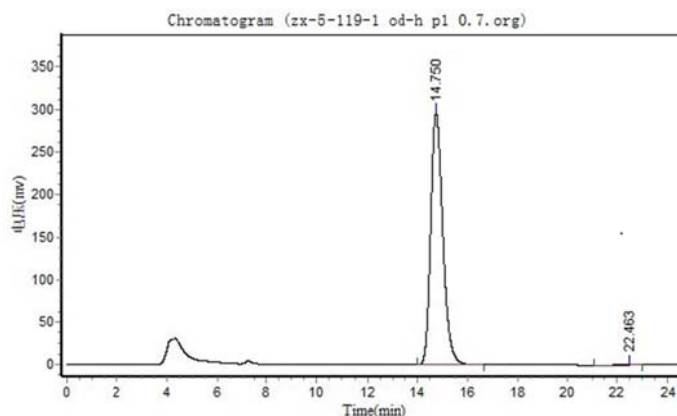

| Results      |         |          |            |             |          |
|--------------|---------|----------|------------|-------------|----------|
| Peak No.     | Peak ID | Ret Time | Height     | Area        | Conc.    |
| 1            |         | 14.750   | 296165.969 | 9923858.000 | 99.8718  |
| 2            |         | 22.463   | 362.932    | 12742.553   | 0.1282   |
| <b>Total</b> |         |          | 296528.901 | 9936600.553 | 100.0000 |

**(R)-7-chloro-3-phenyl)-3,4-dihydro-2H-benzo[b][1,4]oxazin-2-one (3o):**

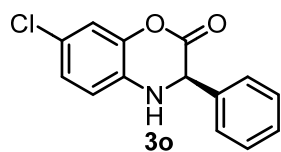

White solid, 98% yield, 99.7% ee

$[\alpha]_D^{20} = -53.6$  ( $c$  1.0,  $\text{CHCl}_3$ );  $^1\text{H NMR}$  (300 MHz,  $\text{CDCl}_3$ ):  $\delta$  7.38 (s, 5H), 7.07-6.97 (m, 2H), 6.75 (d,  $J = 8.4$  Hz, 1H), 5.06 (d,  $J = 1.8$  Hz,

1H), 4.31 (s, 1H).  $^{13}\text{C NMR}$  (151 MHz,  $\text{CDCl}_3$ ):  $\delta$  164.4, 141.1, 135.9, 131.0, 129.2, 129.1, 127.4, 125.1, 124.9, 117.3, 115.6, 59.0; ESI-HRMS exact mass calculated  $\text{C}_{14}\text{H}_{10}\text{ClNO}_2$  for  $[\text{M}-\text{H}]^-$  258.0327, found 258.0325;

HPLC analysis: Chiralcel OD-H column (250 mm); detected at 254 nm; hexane/ $i$ PrOH = 80/20; flow = 0.7 mL/min; Retention time: 17.7 min (major), 30.5 min.

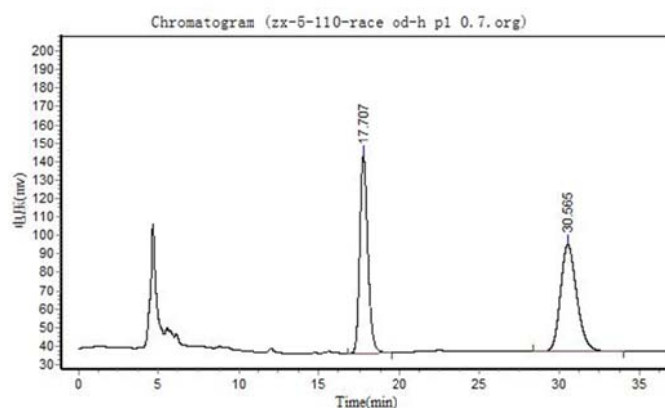

**Results**

| Peak No.     | Peak ID | Ret Time | Height     | Area        | Conc.    |
|--------------|---------|----------|------------|-------------|----------|
| 1            |         | 17.707   | 106635.156 | 3711980.750 | 47.7764  |
| 2            |         | 30.565   | 57865.395  | 4057505.500 | 52.2236  |
| <b>Total</b> |         |          | 164500.551 | 7769486.250 | 100.0000 |

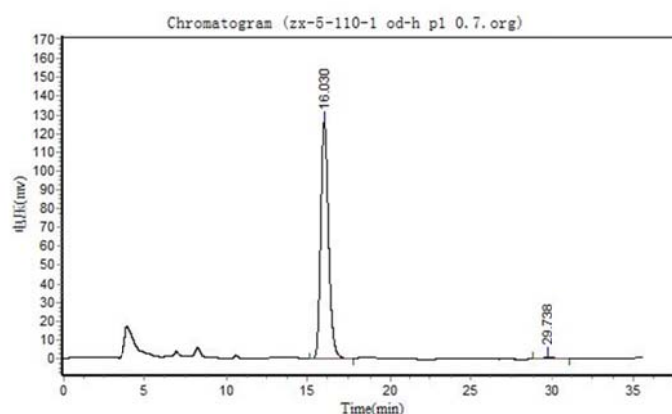

**Results**

| Peak No.     | Peak ID | Ret Time | Height     | Area        | Conc.    |
|--------------|---------|----------|------------|-------------|----------|
| 1            |         | 16.030   | 126137.570 | 4182616.250 | 99.1516  |
| 2            |         | 29.738   | 428.787    | 35790.301   | 0.8484   |
| <b>Total</b> |         |          | 126566.357 | 4218406.551 | 100.0000 |

**(R)-6-(methyl)-3-(4-methoxyphenyl)-3,4-dihydro-2H-benzo[b][1,4]oxazin-2-one (3p):**

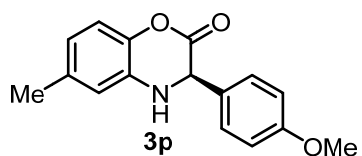

White solid, 97% yield, 99.3% ee

$[\alpha]_D^{20} = -117.5$  ( $c$  0.92,  $\text{CHCl}_3$ );  $^1\text{H NMR}$  (300 MHz,  $\text{CDCl}_3$ ):

$\delta$  7.32 (d,  $J = 8.6$  Hz, 2H), 6.92 (m, 3H), 6.69-6.59 (m, 2H), 4.98(d,  $J=1.8$ , 1H), 4.12 (s, 1H), 3.80 (s, 3H), 2.29 (s, 3H);  $^{13}\text{C NMR}$  (151 MHz,  $\text{CDCl}_3$ ):  $\delta$  165.7, 160.0, 139.0, 135.0, 132.2, 128.8, 128.6, 120.9, 116.6, 115.3, 114.4, 58.8, 55.3, 21.0; ESI-HRMS exact mass calculated  $\text{C}_{16}\text{H}_{15}\text{NO}_3$  for  $[\text{M}+\text{Na}^+]$  293.0944, found 292.0937;

HPLC analysis: Chiralpak AD-H column (250 mm); detected at 254 nm; hexane/ $i$ PrOH = 80/20; flow = 0.7 mL/min; Retention time: 24.4 min, 28.8 min (major).

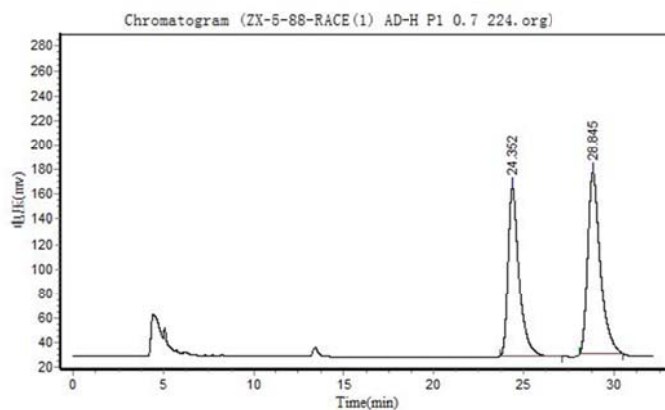

| Results      |         |          |            |              |          |
|--------------|---------|----------|------------|--------------|----------|
| Peak No.     | Peak ID | Ret Time | Height     | Area         | Conc.    |
| 1            |         | 24.352   | 136832.344 | 5832687.000  | 45.3191  |
| 2            |         | 28.845   | 146346.844 | 7037586.000  | 54.6809  |
| <b>Total</b> |         |          | 283179.188 | 12870273.000 | 100.0000 |

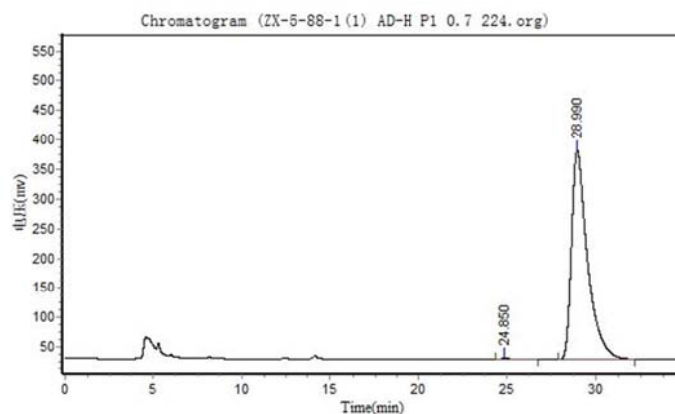

| Results      |         |          |            |              |          |
|--------------|---------|----------|------------|--------------|----------|
| Peak No.     | Peak ID | Ret Time | Height     | Area         | Conc.    |
| 1            |         | 24.850   | 1967.657   | 70489.516    | 0.3206   |
| 2            |         | 28.990   | 352780.500 | 21918850.000 | 99.6794  |
| <b>Total</b> |         |          | 354748.157 | 21989339.516 | 100.0000 |

**(*R,E*)-3-styryl-3,4-dihydro-2*H*-benzo[*b*][1,4]oxazin-2-one (3q):**

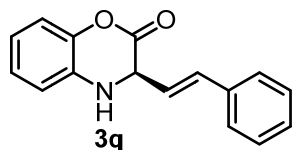

Yellow solid, 28% yield, 95% ee.

$[\alpha]_D^{20} = -40.3$  ( $c$  0.7,  $\text{CHCl}_3$ );  $^1\text{H NMR}$  (300 MHz,  $\text{CDCl}_3$ ):  $\delta$  7.40-7.28

(dd,  $J = 16.4, 4.7$  Hz, 5H), 7.08-7.01 (m, 2H), 6.92-6.86 (dd,  $J = 7.8,$

1.5 Hz, 1H), 6.84-6.69 (m, 2H), 6.45-6.12 (dd,  $J = 15.9, 7.2$  Hz, 1H),

4.82-4.60 (d,  $J = 7.2$  Hz, 1H), 4.12 (s, 1H).  $^{13}\text{C NMR}$  (126 MHz,  $\text{CDCl}_3$ ):  $\delta$  165.61, 141.60,

136.11, 135.86, 132.49, 129.38, 129.27, 127.51, 125.87, 123.57, 121.28, 117.72, 115.88, 58.27.

ESI-HRMS exact mass calculated  $\text{C}_{16}\text{H}_{15}\text{NO}_3$  for  $[\text{M}-\text{H}]^-$  250.0874, found 250.0871;

HPLC analysis: Chiralpak AD-H column (250 mm); detected at 254 nm; hexane/ $i$ PrOH = 80/20;

flow = 0.7 mL/min; Retention time: 10.6 min (major), 11.9 min.

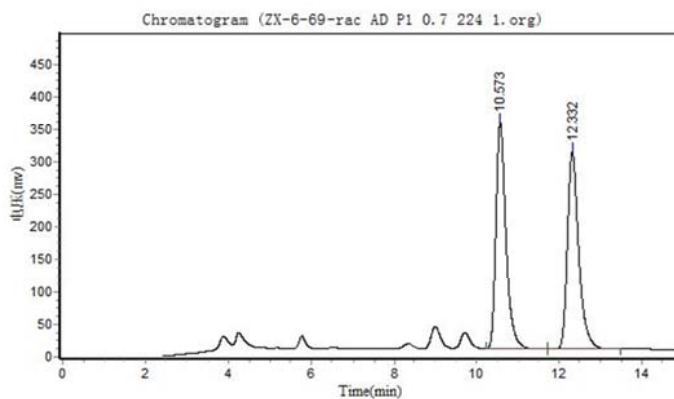

| Results      |         |          |            |              |          |
|--------------|---------|----------|------------|--------------|----------|
| Peak No.     | Peak ID | Ret Time | Height     | Area         | Conc.    |
| 1            |         | 10.573   | 348768.688 | 5849111.500  | 50.5249  |
| 2            |         | 12.332   | 303140.563 | 5727583.500  | 49.4751  |
| <b>Total</b> |         |          | 651909.250 | 11576695.000 | 100.0000 |

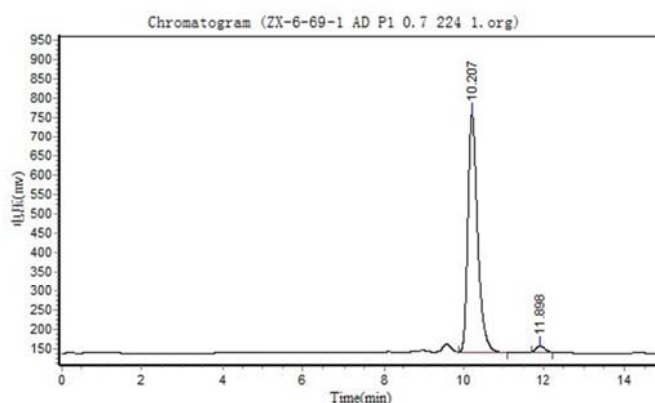

| Results      |         |          |            |              |          |
|--------------|---------|----------|------------|--------------|----------|
| Peak No.     | Peak ID | Ret Time | Height     | Area         | Conc.    |
| 1            |         | 10.207   | 620443.500 | 10392644.000 | 97.6340  |
| 2            |         | 11.898   | 15990.828  | 251852.297   | 2.3660   |
| <b>Total</b> |         |          | 636434.328 | 10644496.297 | 100.0000 |

**(R)-1-methyl-3-phenyl-3,4-dihydroquinoxalin-2(1H)-one (5a)<sup>3</sup>:**

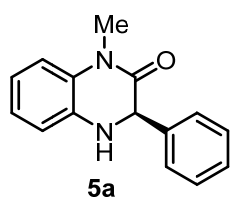

White solid, 83% yield, 99.3% ee

$[\alpha]_D^{20} = -160.1$  (*c* 0.5, CHCl<sub>3</sub>) [Lit.<sup>3</sup>:  $[\alpha]_D^{20} = +153.0$  (*c* 0.4, CHCl<sub>3</sub>) for 92% ee]; <sup>1</sup>H NMR (300 MHz, CDCl<sub>3</sub>): δ 7.41-7.26 (m, 5H), 6.98-6.86 (m, 3H), 6.78-6.73 (m, 1H), 5.07 (s, 1H), 4.34 (s, 1H), 3.40 (s, 3H); <sup>13</sup>C NMR (126

MHz, CDCl<sub>3</sub>): δ 166.7, 139.8, 135.2, 129.4, 129.0, 129.0, 127.8, 124.5, 120.2, 115.5, 114.6, 61.5, 29.9;

HPLC analysis: Chiralpak AD-H column (250 mm); detected at 254 nm; hexane/PrOH = 80/20; flow = 0.7 mL/min; Retention time: 14.5 min, 19.6 min (major).

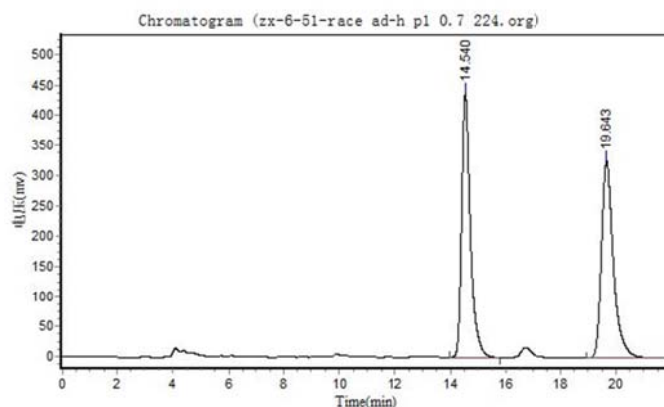

**Results**

| Peak No.     | Peak ID | Ret Time | Height     | Area         | Conc.    |
|--------------|---------|----------|------------|--------------|----------|
| 1            |         | 14.540   | 437921.813 | 9534490.000  | 49.7764  |
| 2            |         | 19.643   | 324949.719 | 9620146.000  | 50.2236  |
| <b>Total</b> |         |          | 762871.531 | 19154636.000 | 100.0000 |

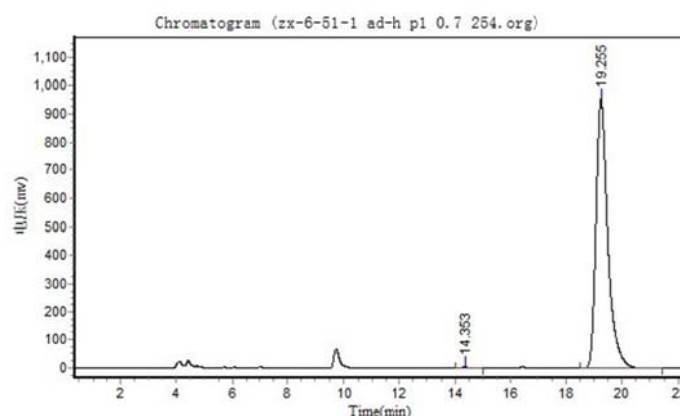

**Results**

| Peak No.     | Peak ID | Ret Time | Height     | Area         | Conc.    |
|--------------|---------|----------|------------|--------------|----------|
| 1            |         | 14.353   | 4467.999   | 91446.398    | 0.3257   |
| 2            |         | 19.255   | 953061.313 | 27986246.000 | 99.6743  |
| <b>Total</b> |         |          | 957529.311 | 28077692.398 | 100.0000 |

**(R)-3-(4-methoxyphenyl)-1-methyl-3,4-dihydroquinoxalin-2(1H)-one (5b):**

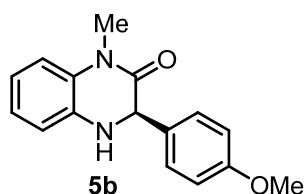

White solid, 80% yield, 99.5% ee

$[\alpha]_D^{20} = -117.2$  (*c* 0.7, CHCl<sub>3</sub>); <sup>1</sup>H NMR (300 MHz, CDCl<sub>3</sub>): δ 7.29 (d, *J* = 8.5 Hz, 2H), 6.98-6.82 (m, 5H), 6.76-6.69 (m, 1H), 4.99 (s, 1H), 4.32 (s, 1H), 3.77 (s, 3H), 3.39 (s, 3H); <sup>13</sup>C NMR (151 MHz, CDCl<sub>3</sub>):

δ 166.4, 159.5, 134.6, 131.2, 128.4, 128.3, 123.7, 119.5, 114.8, 114.1, 114.0, 60.3, 55.3, 29.2;

ESI-HRMS exact mass calculated C<sub>16</sub>H<sub>16</sub>N<sub>2</sub>O<sub>2</sub> for [M+Na<sup>+</sup>] *m/z* 291.1109, found 291.1104;

HPLC analysis: Chiralcel OD-H column (250 mm); detected at 254 nm; hexane/<sup>i</sup>PrOH = 60/40; flow = 0.7 mL/min; Retention time: 12.9 min (major), 18.2 min.

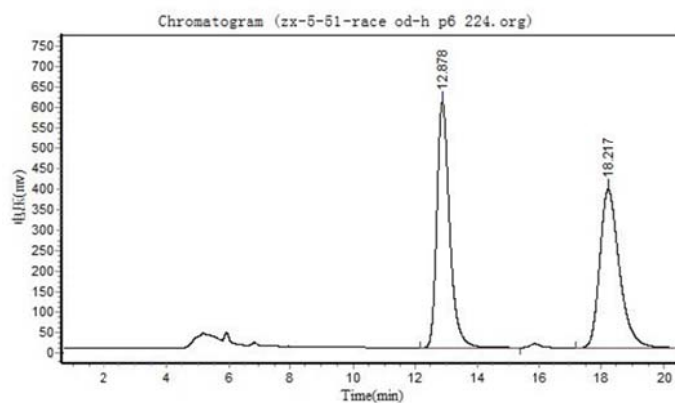

**Results**

| Peak No.     | Peak ID | Ret Time | Height     | Area         | Conc.    |
|--------------|---------|----------|------------|--------------|----------|
| 1            |         | 12.878   | 466111.906 | 13220572.000 | 50.2593  |
| 2            |         | 18.217   | 299786.250 | 13084137.000 | 49.7407  |
| <b>Total</b> |         |          | 765898.156 | 26304709.000 | 100.0000 |

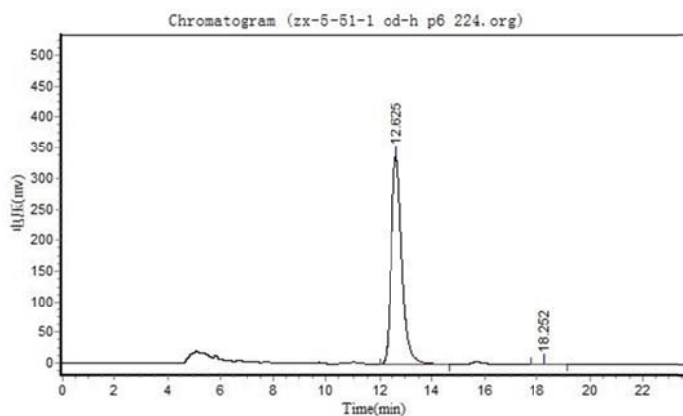

**Results**

| Peak No.     | Peak ID | Ret Time | Height     | Area        | Conc.    |
|--------------|---------|----------|------------|-------------|----------|
| 1            |         | 12.625   | 287377.313 | 8187170.000 | 99.8542  |
| 2            |         | 18.252   | 317.488    | 11954.070   | 0.1458   |
| <b>Total</b> |         |          | 287694.801 | 8199124.070 | 100.0000 |

**(R)-3-(4-methylphenyl)-1-methyl-3,4-dihydroquinoxalin-2(1H)-one (5c)<sup>3</sup>:**

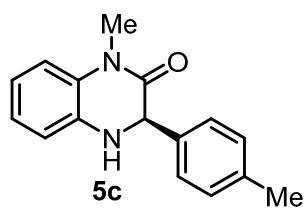

White solid, 79% yield, 99.5% ee

$[\alpha]_D^{20} = -109.1$  (*c* 0.7, CHCl<sub>3</sub>) [Lit.<sup>3</sup>:  $[\alpha]_D^{20} = +106.2$  (*c* 0.4, CHCl<sub>3</sub>)

for 89% ee]; <sup>1</sup>H NMR (300 MHz, CDCl<sub>3</sub>): δ 7.28-7.24 (m, 2H), 7.12 (d, *J* = 7.8 Hz, 2H), 6.976.84 (m, 3H), 6.776.70 (m, 1H), 5.02 (s, 1H),

4.33 (s, 1H), 3.39 (s, 3H), 2.32 (s, 3H); <sup>13</sup>C NMR (126 MHz, CDCl<sub>3</sub>): δ 166.9, 138.8, 136.8, 135.3,

130.2, 130.1, 129.5, 127.7, 124.4, 120.2, 114.6, 61.3, 29.9, 21.8; ESI-HRMS exact mass

calculated C<sub>16</sub>H<sub>16</sub>N<sub>2</sub>O<sub>2</sub> for [M+Na<sup>+</sup>] *m/z* 275.1160, found 291.1155;

HPLC analysis: Chiralpak AD-H column (250 mm); detected at 254 nm; hexane/<sup>i</sup>PrOH = 80/20;

flow = 0.7 mL/min; Retention time: 16.6 min, 22.7 min (major).

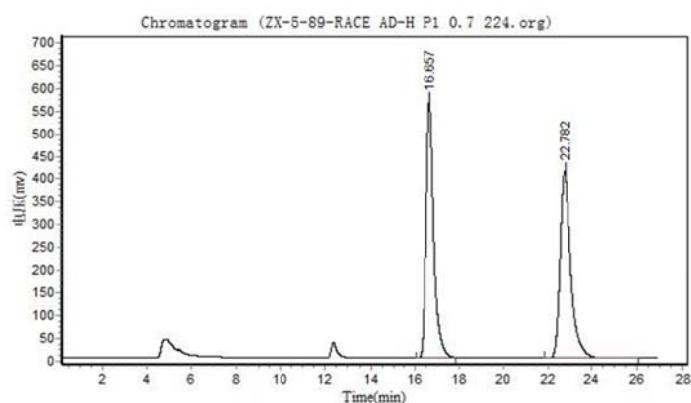

**Results**

| Peak No.     | Peak ID | Ret Time | Height     | Area         | Conc.    |
|--------------|---------|----------|------------|--------------|----------|
| 1            |         | 16.657   | 564434.813 | 13868713.000 | 49.8348  |
| 2            |         | 22.782   | 409918.188 | 13960644.000 | 50.1652  |
| <b>total</b> |         |          | 974353.000 | 27829357.000 | 100.0000 |

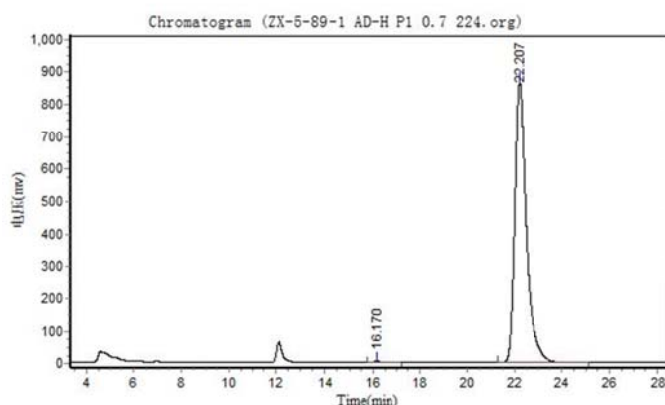

**Results**

| Peak No.     | Peak ID | Ret Time | Height     | Area         | Conc.    |
|--------------|---------|----------|------------|--------------|----------|
| 1            |         | 16.170   | 2819.037   | 64030.500    | 0.2178   |
| 2            |         | 22.207   | 863602.563 | 29330020.000 | 99.7822  |
| <b>Total</b> |         |          | 866421.599 | 29394050.500 | 100.0000 |

**(R)-3-(4-fluorophenyl)-1-methyl-3,4-dihydroquinoxalin-2(1H)-one (5d):**

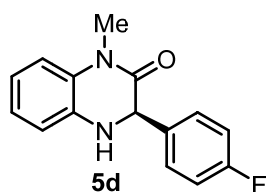

White solid, 79% yield, 99.9% ee

$[\alpha]_D^{20} = -150.3$  (*c* 0.5, CHCl<sub>3</sub>) [Lit.<sup>3</sup>:  $[\alpha]_D^{20} = +144.8.4$ , (*c* 0.4, CHCl<sub>3</sub>) for 92% ee]; <sup>1</sup>H NMR (300 MHz, CDCl<sub>3</sub>): δ 7.40-7.33 (m, 2H), 7.04-6.88 (m, 5H), 6.75 (dd, *J* = 7.6, 1.6 Hz, 1H), 5.03 (s, 1H), 4.33 (s, 1H), 3.39

(s, 3H); <sup>13</sup>C NMR (151 MHz, CDCl<sub>3</sub>): δ 166.0, 162.6 (*d*, *J* = 247.6Hz), 134.8 (*d*, *J* = 4.5Hz), 128.9 (*d*, *J* = 9.0Hz), 128.3, 123.8, 119.7, 115.6 (*d*, *J* = 21.1Hz), 114.9, 114.0, 60.2, 29.3; ESI-HRMS exact mass calculated C<sub>15</sub>H<sub>13</sub>FN<sub>2</sub>O for [M+H<sup>+</sup>] *m/z* 279.0910 found 279.0904;

HPLC analysis: Chiralpak AD-H column (250 mm); detected at 254 nm; hexane/<sup>i</sup>PrOH = 80/20; flow = 0.7 mL/min; Retention time: 14.7 min, 17.6 min (major).

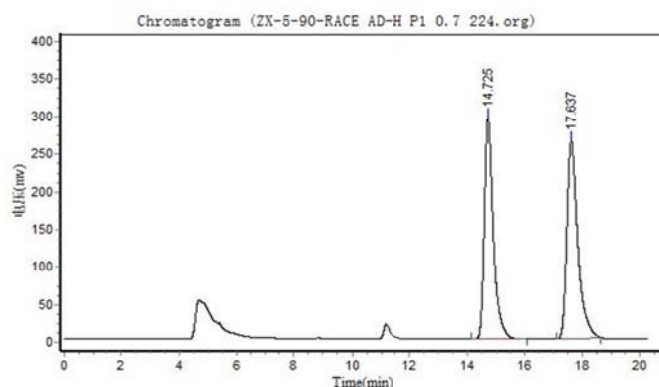

| Results      |         |          |            |              |          |
|--------------|---------|----------|------------|--------------|----------|
| Peak No.     | Peak ID | Ret Time | Height     | Area         | Conc.    |
| 1            |         | 14.725   | 293641.281 | 6323468.500  | 48.0239  |
| 2            |         | 17.637   | 261944.000 | 6843867.000  | 51.9761  |
| <b>total</b> |         |          | 555585.281 | 13167335.500 | 100.0000 |

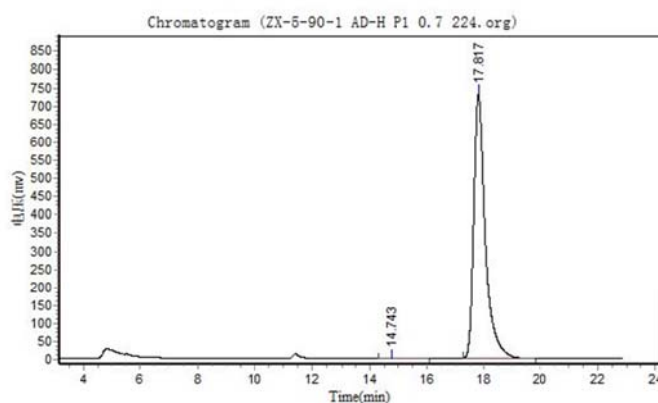

| Results      |         |          |            |              |          |
|--------------|---------|----------|------------|--------------|----------|
| Peak No.     | Peak ID | Ret Time | Height     | Area         | Conc.    |
| 1            |         | 14.743   | 405.161    | 11496.312    | 0.0566   |
| 2            |         | 17.817   | 726920.125 | 20307098.000 | 99.9434  |
| <b>Total</b> |         |          | 727325.286 | 20318594.312 | 100.0000 |



(*R*)-3-(3,4-dimethylphenyl)-1-methyl-3,4-dihydroquinoxalin-2(1*H*)-one (**5e**):

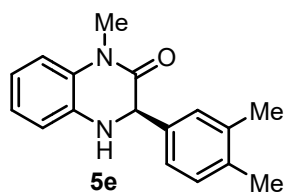

White solid, 56% yield, 99.5% ee

$[\alpha]_D^{20} = -57.9$  (*c* 0.5, CHCl<sub>3</sub>); <sup>1</sup>H NMR (300 MHz, CDCl<sub>3</sub>): δ 7.17 (s, 1H), 7.08 (d, *J* = 1.6 Hz, 2H), 6.97-6.86 (m, 3H), 6.76-6.70 (m, 1H), 4.99 (s, 1H), 3.40 (s, 3H), 2.23 (s, 6H); <sup>13</sup>C NMR (126 MHz, CDCl<sub>3</sub>): δ

165.9, 136.5, 136.3, 136.0, 134.2, 129.4, 128.0, 128.0, 123.9, 123.2, 119.0, 114.2, 113.4, 60.2, 28.7, 19.4, 19.0; ESI-HRMS exact mass calculated C<sub>17</sub>H<sub>18</sub>N<sub>2</sub>O for [M+H<sup>+</sup>] *m/z* 266.1419, found 266.1411;

HPLC analysis: Chiralpak AD-H column (250 mm); detected at 254 nm; hexane/<sup>i</sup>PrOH = 80/20; flow = 0.7 mL/min; Retention time: 13.0 min, 20.5 min (major).

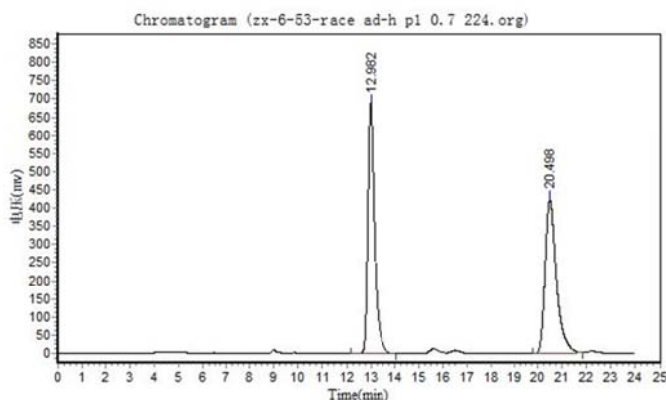

| Results      |         |          |             |              |          |
|--------------|---------|----------|-------------|--------------|----------|
| Peak No.     | Peak ID | Ret Time | Height      | Area         | Conc.    |
| 1            |         | 12.982   | 686383.250  | 13595829.000 | 49.6850  |
| 2            |         | 20.498   | 422186.250  | 13768204.000 | 50.3150  |
| <b>Total</b> |         |          | 1108569.500 | 27364033.000 | 100.0000 |

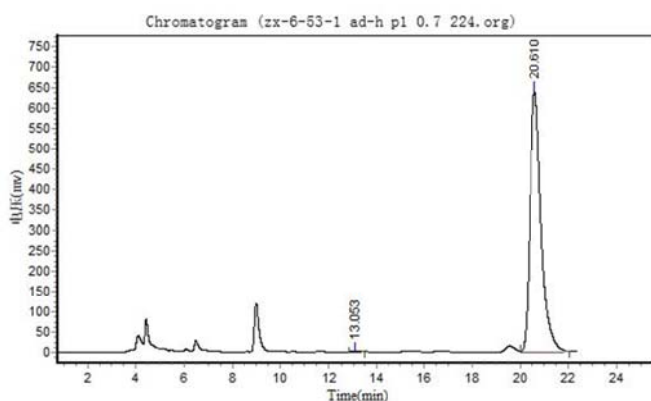

| Results      |         |          |            |              |          |
|--------------|---------|----------|------------|--------------|----------|
| Peak No.     | Peak ID | Ret Time | Height     | Area         | Conc.    |
| 1            |         | 13.053   | 2617.071   | 48462.703    | 0.2315   |
| 2            |         | 20.610   | 639586.313 | 20885580.000 | 99.7685  |
| <b>Total</b> |         |          | 642203.384 | 20934042.703 | 100.0000 |

(*R*)-3-(2-methylphenyl)-1-methyl-3,4-dihydroquinoxalin-2(1H)-one (**5h**):

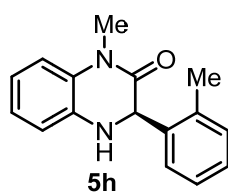

White solid, 79% yield, 99.7% ee

$[\alpha]_D^{20} = -127.3$  (*c* 0.6, CHCl<sub>3</sub>); <sup>1</sup>H NMR (300 MHz, CDCl<sub>3</sub>): δ 7.37 (d, *J* = 7.4 Hz, 1H), 7.24-7.17 (m, 3H), 7.00-6.90 (m, 3H), 6.71-6.65 (m, 1H), 5.24 (s, 1H), 4.17 (s, 1H), 3.42 (s, 2H), 2.46 (s, 3H); <sup>13</sup>C NMR (126 MHz, CDCl<sub>3</sub>): δ 166.0, 136.7, 136.4, 134.7, 130.5, 128.2, 127.8, 127.0, 125.9, 123.2, 119.1, 114.2, 113.4, 57.7, 28.7, 19.3; ESI-HRMS exact mass calculated C<sub>16</sub>H<sub>16</sub>N<sub>2</sub>O for [M+H<sup>+</sup>] *m/z* 253.1335, found 253.1330;

HPLC analysis: Chiralpak AD-H column (250 mm); detected at 254 nm; hexane/<sup>i</sup>PrOH = 90/10; flow = 0.7 mL/min; Retention time: 25.2 min, 27.4 min (major).

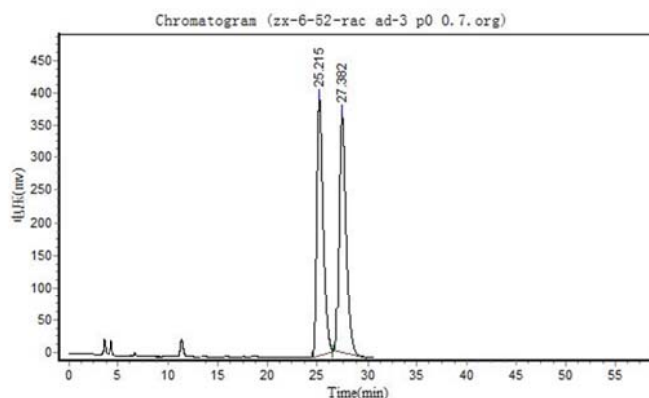

Results

| Peak No.     | Peak ID | Ret Time | Height     | Area         | Conc.    |
|--------------|---------|----------|------------|--------------|----------|
| 1            |         | 25.215   | 393965.219 | 17416078.000 | 50.7115  |
| 2            |         | 27.382   | 364229.688 | 16927390.000 | 49.2885  |
| <b>Total</b> |         |          | 758194.906 | 34343468.000 | 100.0000 |

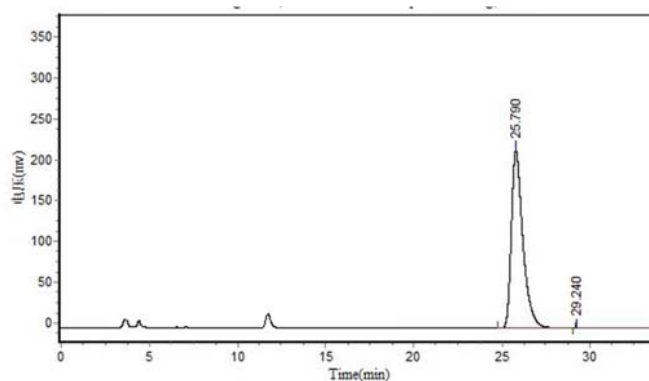

Results

| Peak No. | Peak ID | Ret Time | Height     | Area        | Conc.   |
|----------|---------|----------|------------|-------------|---------|
| 1        |         | 25.790   | 218453.563 | 9910515.000 | 99.8710 |
| 2        |         | 29.240   | 44.164     | 12320.217   | 0.1242  |

**(R)-1-methyl-3-(naphthalen-1-yl)-3,4-dihydroquinoxalin-2(1H)-one (5i):**

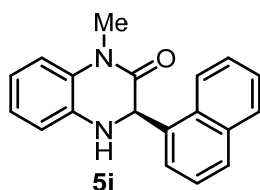

White solid, 69% yield, 99.9% ee

$[\alpha]_D^{20} = -53.6$  (*c* 0.6, CHCl<sub>3</sub>); <sup>1</sup>H NMR (300 MHz, CDCl<sub>3</sub>): δ 8.29 (d, *J* = 8.2 Hz, 1H), 7.95-7.72 (m, 2H), 7.60-7.33 (m, 4H), 7.10-6.82 (m, 3H), 6.66 (dd, *J* = 7.0, 2.1 Hz, 1H), 5.74 (s, 1H), 4.29 (s, 1H), 3.47 (s, 3H);

<sup>13</sup>C NMR (151 MHz, CDCl<sub>3</sub>): δ 166.4, 134.9, 134.4, 134.2, 131.3, 129.3, 128.9, 128.7, 126.5, 125.8, 125.9, 125.2, 124.0, 123.7, 119.7, 114.8, 114.1, 58.7, 29.3; ESI-HRMS exact mass calculated C<sub>19</sub>H<sub>16</sub>N<sub>2</sub>O for [M+H<sup>+</sup>] *m/z* 289.1335, found 289.1339;

HPLC analysis: Chiralcel OD-H column (250 mm); detected at 254 nm; hexane/<sup>i</sup>PrOH = 80/20; flow = 0.7 mL/min; Retention time: 40.4 min (major), 46.0 min.

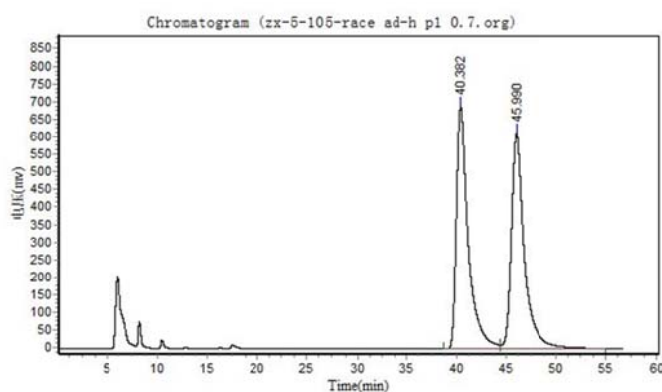

| Results      |         |          |             |               |          |
|--------------|---------|----------|-------------|---------------|----------|
| Peak No.     | Peak ID | Ret Time | Height      | Area          | Conc.    |
| 1            |         | 40.382   | 689696.938  | 56696752.000  | 50.5288  |
| 2            |         | 45.990   | 612508.375  | 55510160.000  | 49.4712  |
| <b>Total</b> |         |          | 1302205.313 | 112206912.000 | 100.0000 |

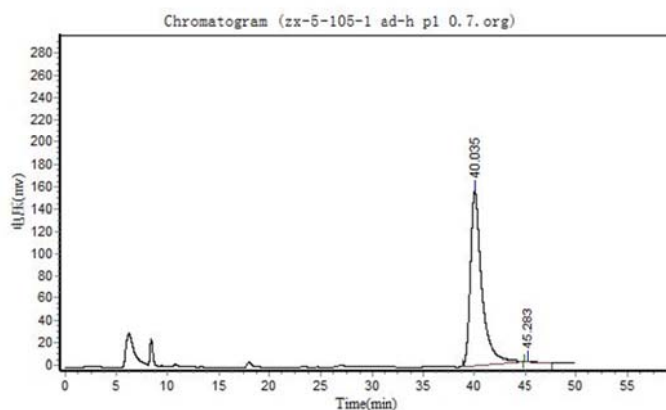

| Results      |         |          |            |              |          |
|--------------|---------|----------|------------|--------------|----------|
| Peak No.     | Peak ID | Ret Time | Height     | Area         | Conc.    |
| 1            |         | 40.035   | 156311.125 | 12048941.000 | 99.9748  |
| 2            |         | 45.283   | 206.072    | 3033.995     | 0.0252   |
| <b>Total</b> |         |          | 156517.197 | 12051974.995 | 100.0000 |

**(R)-1-benzyl-3-(4-methoxyphenyl)-3,4-dihydroquinoxalin-2(1H)-one (5j):**

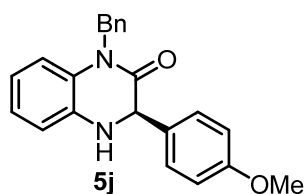

White solid, 69% yield, 98.9% ee

$[\alpha]_D^{20} = -80.0$  ( $c$  0.7,  $\text{CHCl}_3$ );  $^1\text{H NMR}$  (300 MHz,  $\text{CDCl}_3$ ):  $\delta$  7.36 (d,  $J = 8.7$  Hz, 2H), 7.23 (m, 5H), 6.87 (m, 4H), 6.78-6.67 (m, 2H), 5.33-5.05 (m, 3H), 4.39 (s, 1H), 3.79 (s, 3H);  $^{13}\text{C NMR}$  (151 MHz,

$\text{CDCl}_3$ ):  $\delta$  166.5, 159.6, 136.7, 134.7, 131.1, 128.7, 128.3, 127.6, 127.1, 126.5, 123.8, 119.5, 115.6, 114.2, 60.3, 55.3, 45.9; ESI-HRMS exact mass calculated  $\text{C}_{22}\text{H}_{20}\text{N}_2\text{O}_2$  for  $[\text{M}+\text{H}^+]$   $m/z$  345.1598, found 345.1589;

HPLC analysis: Chiralcel OD-H column (250 mm); detected at 254 nm; hexane/ $i$ PrOH = 80/20; flow = 0.7 mL/min; Retention time: 15.6 min (major), 23.9 min.

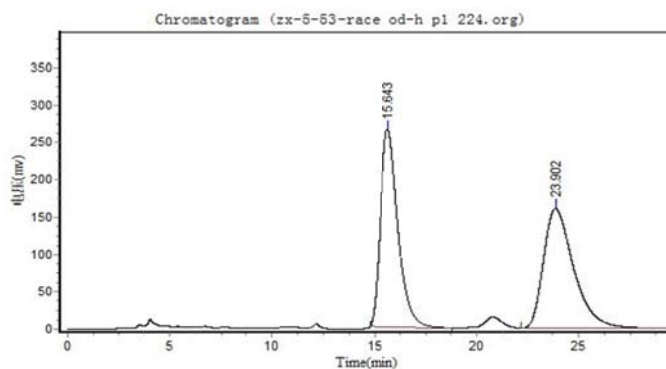

| PeakNo.      | Peak ID | Ret Time | Height     | Area         | Conc.    |
|--------------|---------|----------|------------|--------------|----------|
| 1            |         | 15.643   | 264416.531 | 15938082.000 | 49.3175  |
| 2            |         | 23.902   | 160449.219 | 16379238.000 | 50.6825  |
| <b>Total</b> |         |          | 424865.750 | 32317320.000 | 100.0000 |

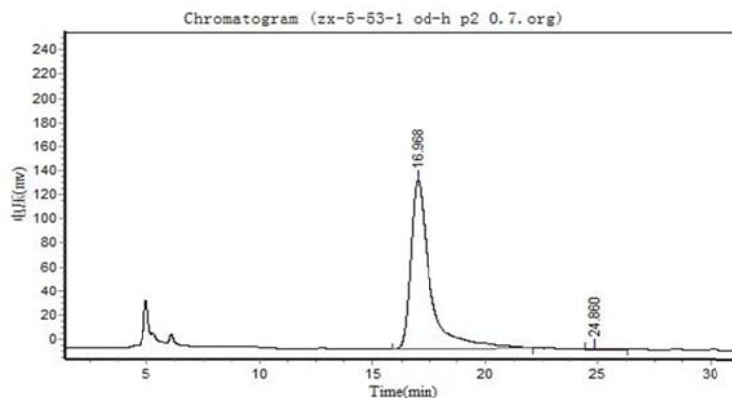

| Peak No.     | Peak ID | Ret Time | Height     | Area        | Conc.    |
|--------------|---------|----------|------------|-------------|----------|
| 1            |         | 16.968   | 139476.031 | 8437684.000 | 99.4620  |
| 2            |         | 24.860   | 731.188    | 45638.652   | 0.5380   |
| <b>Total</b> |         |          | 140207.220 | 8483322.652 | 100.0000 |

**(R)-1-(4-methoxybenzyl)-3-(p-tolyl)-3,4-dihydroquinoxalin-2(1H)-one (5k):**

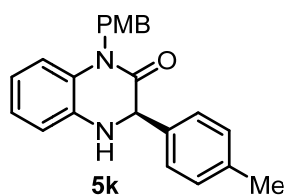

White solid, 67% yield, 99.9% ee.

$[\alpha]_D^{20} = -53.6$  ( $c$  0.5,  $\text{CHCl}_3$ );  $^1\text{H NMR}$  (300 MHz,  $\text{CDCl}_3$ ):  $\delta$  7.35-7.27 (d,  $J = 7.8$  Hz, 2H), 7.17-7.06 (m, 4H), 6.94-6.69 (m, 6H), 5.27-4.98 (m, 3H), 4.49- 4.31 (s, 1H), 3.84-3.55 (d,  $J = 1.2$  Hz, 3H), 2.39- 2.24 (s,

3H);  $^{13}\text{C NMR}$  (126 MHz,  $\text{CDCl}_3$ ):  $\delta$  166.99, 159.39, 138.83, 136.68, 135.38, 130.15, 129.48, 128.57, 128.31, 127.68, 124.44, 120.21, 116.32, 114.89, 61.36, 55.95, 45.99, 21.85; ESI-HRMS exact mass calculated  $\text{C}_{23}\text{H}_{22}\text{N}_2\text{O}$  for  $[\text{M}+\text{H}^+]$   $m/z$  359.1754, found 359.1747;

HPLC analysis: Chiralcel OD-H column (250 mm); detected at 254 nm; hexane/ $i$ PrOH = 80/20; flow = 0.7 mL/min; Retention time: 21.6 min (major), 28.5 min.

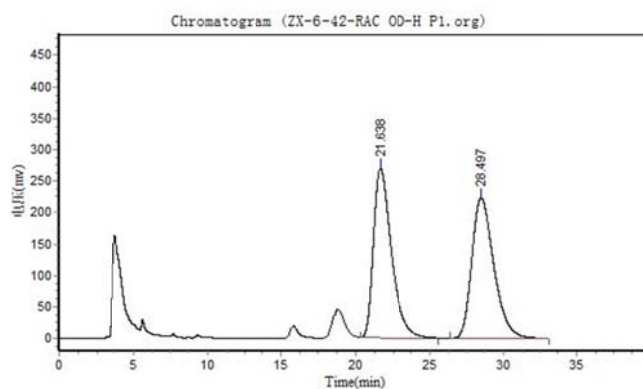

| Results      |         |          |            |              |          |  |
|--------------|---------|----------|------------|--------------|----------|--|
| Peak No.     | Peak ID | Ret Time | Height     | Area         | Conc.    |  |
| 1            |         | 21.638   | 267826.313 | 22679680.000 | 49.6578  |  |
| 2            |         | 28.497   | 222940.328 | 22992222.000 | 50.3422  |  |
| <b>Total</b> |         |          | 490766.641 | 45671902.000 | 100.0000 |  |

Quantification: Area/Area%

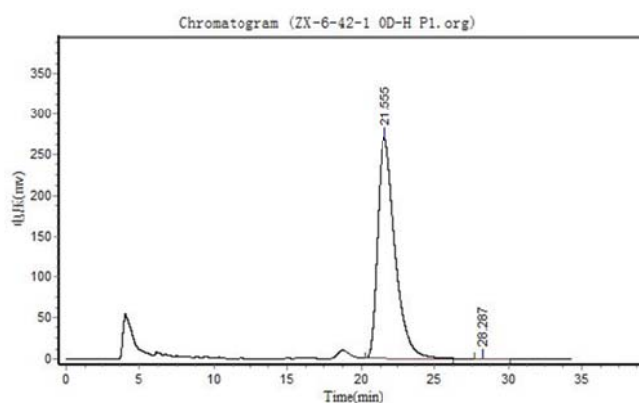

| Results      |         |          |            |              |          |  |
|--------------|---------|----------|------------|--------------|----------|--|
| Peak No.     | Peak ID | Ret Time | Height     | Area         | Conc.    |  |
| 1            |         | 21.555   | 268948.625 | 22538076.000 | 99.9525  |  |
| 2            |         | 28.287   | 130.404    | 10702.951    | 0.0475   |  |
| <b>Total</b> |         |          | 269079.029 | 22548778.951 | 100.0000 |  |

(*R*)-6,7-difluoro-1-methyl-3-phenyl-3,4-dihydroquinoxalin-2(1*H*)-one (**51**):

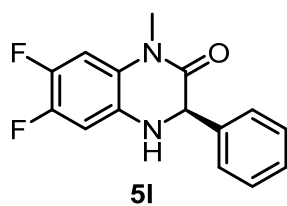

Yellow solid, 80% yield, 99.6 % ee

$[\alpha]_D^{20} = -51.0$  ( $c$  0.8,  $\text{CHCl}_3$ );  $^1\text{H NMR}$  (300 MHz,  $\text{CDCl}_3$ )  $\delta$  7.42-7.25

(s, 5H), 6.85-6.68 (m, 1H), 6.60-6.47 (dd,  $J = 10.8, 7.3$  Hz, 1H),

5.04-4.94 (d,  $J = 1.6$  Hz, 1H), 4.53-4.36 (s, 1H), 3.34-3.24 (s, 3H);  $^{13}\text{C}$

NMR (125 MHz,  $\text{CDCl}_3$ )  $\delta$  165.5, 146.1(dd,  $J = 242.5$  Hz, 13.7 Hz), 143.6 (dd,  $J = 236.2.5$  Hz,

13.7 Hz), 138.3, 130.8, 128.7, 128.4, 126.9, 124.2 (d,  $J = 7.5$  Hz), 104.4 (d,  $J = 22.5$  Hz), 102.7

(d,  $J = 22.5$  Hz), 60.4, 29.5; ESI-HRMS exact mass calculated  $\text{C}_{22}\text{H}_{22}\text{N}_2\text{O}_2$  for  $[\text{M}-\text{H}]^-$   $m/z$

273.0845, found 273.0841;

HPLC analysis: Chiralpak AD-H column (250 mm); detected at 254 nm; hexane/ $i$ PrOH = 90/10;

flow = 0.7 mL/min; Retention time: 12.8 min (major), 17.8 min.

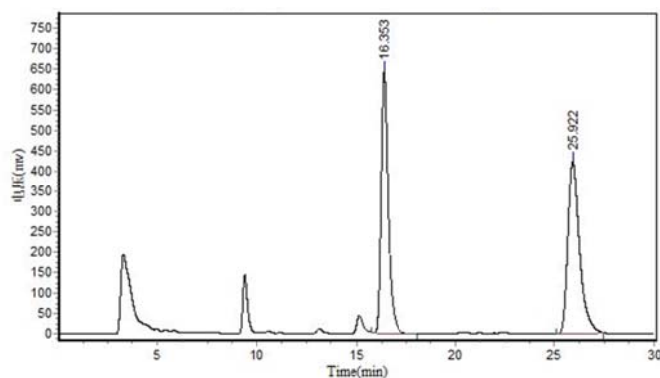

**Results**

| Peak No.     | Peak ID | Ret Time | Height      | Area         | Conc.    |
|--------------|---------|----------|-------------|--------------|----------|
| 1            |         | 16.353   | 642079.000  | 15831869.000 | 48.0695  |
| 2            |         | 25.922   | 423554.750  | 17103514.000 | 51.9305  |
| <b>Total</b> |         |          | 1065633.750 | 32935383.000 | 100.0000 |

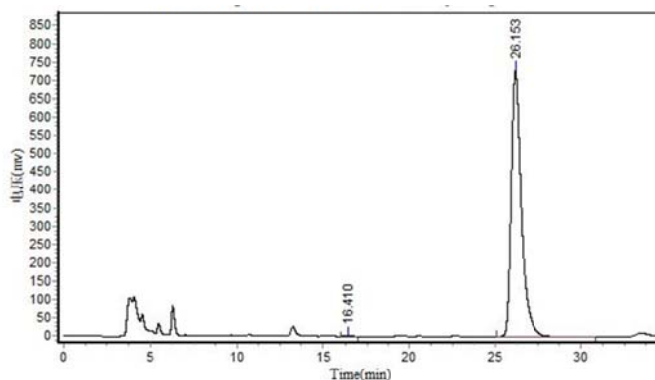

**Results**

| Peak No.     | Peak ID | Ret Time | Height     | Area         | Conc.    |
|--------------|---------|----------|------------|--------------|----------|
| 1            |         | 16.410   | 2282.925   | 56108.594    | 0.1878   |
| 2            |         | 26.153   | 726906.125 | 29824520.000 | 99.8122  |
| <b>Total</b> |         |          | 729189.050 | 29880628.594 | 100.0000 |

## 5. Synthesis of benzomorpholine **6**, tetrahydroquinoxaline **7** and glycine amide **8**:

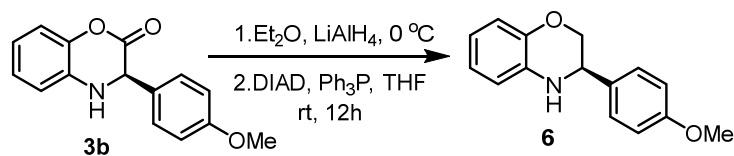

To a solution of dihydrobenzoxazinones **3b** (0.2 mmol, 51 mg) in  $\text{Et}_2\text{O}$ ,  $\text{LiAlH}_4$  (12 mg, 0.32 mmol) was added in portions at  $0\text{ }^\circ\text{C}$ . The resulting mixture was stirred at  $0\text{ }^\circ\text{C}$  for 1 h. After excess  $\text{LiAlH}_4$  was decomposed by wet ether, water was added and the mixture was extracted with  $\text{EtOAc}$ . The combined extracts were washed with brine, dried ( $\text{Na}_2\text{SO}_4$ ), and concentrated under reduced pressure to afford dark oil. The dark oil and triphenylphosphine (104 mg, 0.4 mmol) were dissolved in dry THF under nitrogen. DIAD (80 mg, 0.4 mmol) was added dropwise at  $0\text{ }^\circ\text{C}$ . The mixture was stirred at  $30\text{ }^\circ\text{C}$  for 12 h. After removing the solvent in vacuo, the crude product was purified by flash chromatography (petroleum ether/ethyl acetate 10:1) to afford benzomorpholine **6** as white solid (40 mg, 83% yield, 99% ee).

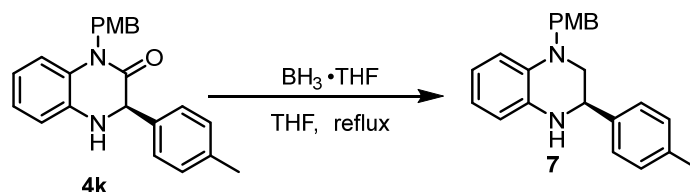

To a solution of dihydroquinoxalinones **4k** (36 mg, 0.1 mmol) in THF 1.5 mL,  $\text{BH}_3 \cdot \text{THF}$  (1.0 M in THF, 0.25 mL, 0.25 mmol) was added slowly at room temperature. After the completion of the addition, the reaction was refluxed for 3 h. The reaction mixture then cooled and the solvent was evaporated in vacuo, the crude was purified by flash chromatography (petroleum ether/ethyl acetate 10:1) to afford tetrahydroquinoxaline **7** (34 mg, 99% yield, 98% ee).

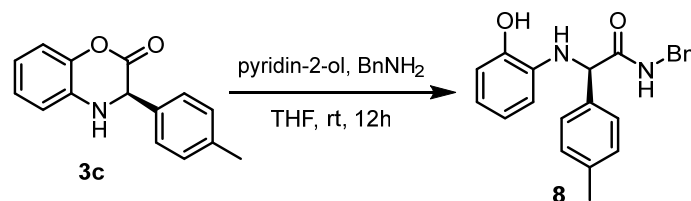

Pyridin-2-ol (3 equiv) benzylamine (5 equiv) were added to a solution of dihydrobenzoxazinone **3c** in THF. The mixture was stirred at room temperature for 12 h, then diluted with water and extracted with  $\text{EtOAc}$ . The extracts were dried and evaporated. Purification of the crude product by column chromatography on silica gel (ethyl acetate/hexane) afforded the pure product **8**.

## 6. Characterization data and HPLC chromatogram of derivative 6, 7, 8:

(*R*)-3-(4-methoxyphenyl)-3,4-dihydro-2*H*-1,4-benzoxazine (**6**)<sup>5</sup>:

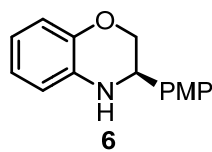

White solid, 83% yield, 99% ee

$[\alpha]_D^{20} = -60.3$  (*c* 0.6, CHCl<sub>3</sub>) [Lit.<sup>5</sup>:  $[\alpha]_D^{20} = +55.5$ , (*c* 1.0, CHCl<sub>3</sub>) for 98% ee];

<sup>1</sup>H NMR (300 MHz, CDCl<sub>3</sub>):  $\delta$  7.31 (d, *J* = 7.4 Hz, 2H), 6.94-6.87 (m, 2H), 6.87-6.61 (m, 4H), 4.45 (dd, *J* = 8.8, 2.8 Hz, 1H), 4.24 (dd, *J* = 10.6, 3.1 Hz, 1H), 3.96 (m, 1H), 3.81 (s, 3H);

HPLC analysis: Chiralcel OD-H column (250 mm); detected at 254 nm; hexane/<sup>*i*</sup>PrOH = 80/20; flow = 0.7 mL/min; Retention time: 12.3 min (major), 19.6 min.

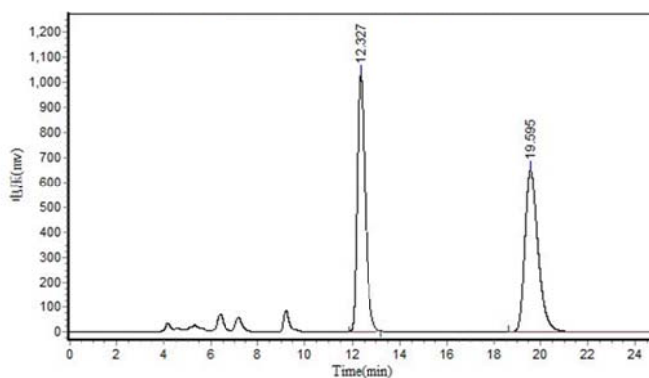

| Results      |         |          |             |              |          |
|--------------|---------|----------|-------------|--------------|----------|
| Peak No.     | Peak ID | Ret Time | Height      | Area         | Conc.    |
| 1            |         | 12.327   | 1027099.000 | 24360364.000 | 49.4006  |
| 2            |         | 19.595   | 647153.250  | 24951502.000 | 50.5994  |
| <b>Total</b> |         |          | 1674252.250 | 49311866.000 | 100.0000 |

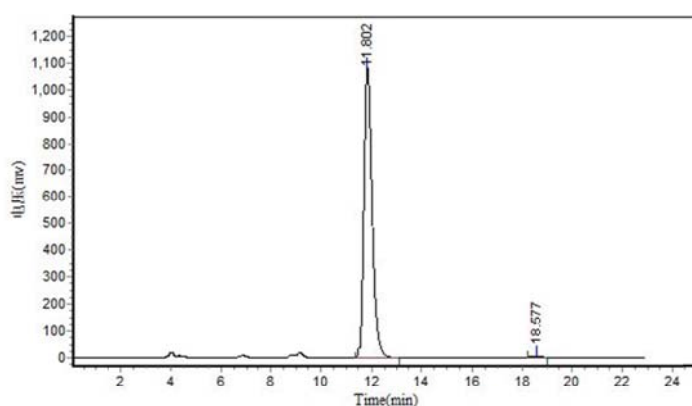

| Results      |         |          |             |              |          |
|--------------|---------|----------|-------------|--------------|----------|
| Peak No.     | Peak ID | Ret Time | Height      | Area         | Conc.    |
| 1            |         | 11.802   | 1079673.875 | 24420142.000 | 99.5003  |
| 2            |         | 18.577   | 4557.676    | 122647.805   | 0.4997   |
| <b>Total</b> |         |          | 1084231.551 | 24542789.805 | 100.0000 |



(*R*)-1-(4-methoxybenzyl)-3-(*p*-tolyl)-1,2,3,4-tetrahydroquinoxaline (**7**):

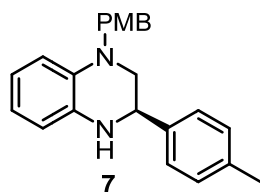

Green oil, 99% yield, 98% ee

$[\alpha]_D^{20} = -41.0$  ( $c$  0.4,  $\text{CHCl}_3$ );  $^1\text{H NMR}$  (300 MHz,  $\text{CDCl}_3$ ):  $\delta$  7.43-7.19 (m, 6H), 7.00-6.76 (m, 2H), 6.71-6.58 (m, 4H), 4.58-4.44 (d,  $J = 5.6$  Hz, 1H), 4.47-4.31 (s, 2H), 4.10 (s, 1H), 3.93-3.78 (d,  $J = 2.0$  Hz, 3H),

3.53-3.17 (d,  $J = 6.3$  Hz, 2H), 2.44-2.22 (d,  $J = 2.0$  Hz, 3H);  $^{13}\text{C NMR}$  (126 MHz,  $\text{CDCl}_3$ ):  $\delta$  159.33, 139.30, 138.33, 135.27, 135.16, 131.10, 129.98, 129.07, 127.66, 119.79, 118.58, 114.66, 112.80, 56.37, 55.99, 55.52, 54.70, 21.84. ESI-HRMS exact mass calculated  $\text{C}_{23}\text{H}_{24}\text{N}_2\text{O}_2$  for  $[\text{M}+\text{H}^+]$   $m/z$  345.1961, found 345.1953.

HPLC analysis: Chiralcel OD-H column (250 mm); detected at 254 nm; hexane/ $i$ PrOH = 80/20; flow = 0.7 mL/min; Retention time: 23.7 min (major), 36.1 min.

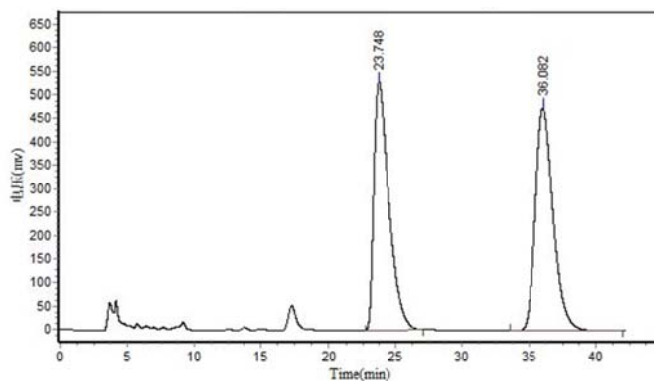

| Results      |         |          |             |              |          |
|--------------|---------|----------|-------------|--------------|----------|
| Peak No.     | Peak ID | Ret Time | Height      | Area         | Conc.    |
| 1            |         | 23.748   | 527353.438  | 41825032.000 | 48.7274  |
| 2            |         | 36.082   | 474806.063  | 44009744.000 | 51.2726  |
| <b>Total</b> |         |          | 1002159.500 | 85834776.000 | 100.0000 |

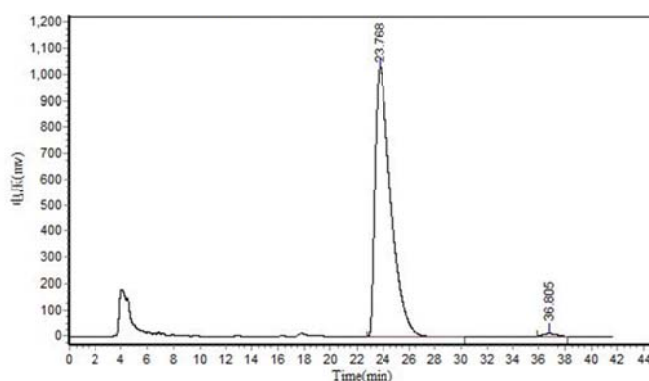

| Results      |         |          |             |              |          |
|--------------|---------|----------|-------------|--------------|----------|
| Peak No.     | Peak ID | Ret Time | Height      | Area         | Conc.    |
| 1            |         | 23.768   | 1031093.250 | 89244192.000 | 99.1239  |
| 2            |         | 36.805   | 10538.326   | 788779.500   | 0.8761   |
| <b>Total</b> |         |          | 1041631.576 | 90032971.500 | 100.0000 |

**(R)-N-benzyl-2-((2-hydroxyphenyl)amino)-2-(p-tolyl)acetamide (8):**

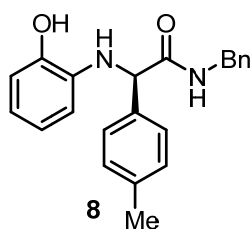

Brown solid, 90% yield, 99% ee

$[\alpha]_D^{20} = -120.0$  ( $c$  0.5,  $\text{CHCl}_3$ );  $^1\text{H NMR}$  (300 MHz,  $\text{CDCl}_3$ ):  $\delta$  7.53 (t,  $J = 6.1$  Hz, 1H), 7.25 (m, 8H), 6.77 (m, 1H), 6.64 (d,  $J = 6.9$  Hz, 2H), 6.54 (d,  $J = 7.7$  Hz, 1H), 4.68 (s, 1H), 4.52 (dd,  $J = 15.0, 6.3$  Hz, 1H), 4.36 (dd,  $J = 15.0, 5.7$  Hz, 1H), 2.32 (s, 3H);  $^{13}\text{C NMR}$  (126 MHz,  $\text{CDCl}_3$ ):  $\delta$  172.7,

144.1, 138.4, 137.7, 135.6, 135.4, 129.8, 128.6, 127.6, 127.4, 127.3 121.0, 119.3 114.6, 112.6, 64.5, 43.4, 21.2; ESI-HRMS exact mass calculated  $\text{C}_{22}\text{H}_{22}\text{N}_2\text{O}_2$  for  $[\text{M}+\text{H}^+]$   $m/z$  347.1754, found 347.1745;

HPLC analysis: Chiralcel OD-H column (250 mm); detected at 254 nm; hexane/ $\text{PrOH} = 80/20$ ; flow = 0.7 mL/min; Retention time: 12.8 min (major), 17.8 min.

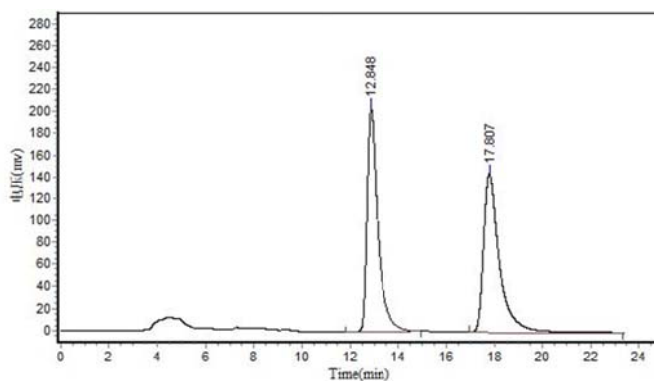

**Results**

| Peak No.     | Peak ID | Ret Time | Height     | Area         | Conc.    |
|--------------|---------|----------|------------|--------------|----------|
| 1            |         | 12.848   | 203728.484 | 6592162.500  | 49.9626  |
| 2            |         | 17.807   | 144449.625 | 6602023.500  | 50.0374  |
| <b>Total</b> |         |          | 348178.109 | 13194186.000 | 100.0000 |

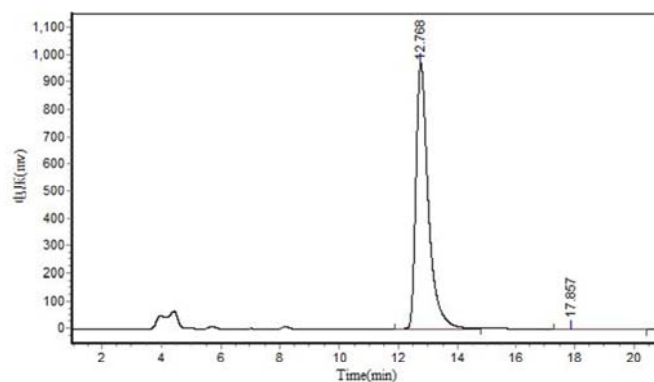

**Results**

| Peak No.     | Peak ID | Ret Time | Height     | Area         | Conc.    |
|--------------|---------|----------|------------|--------------|----------|
| 1            |         | 12.768   | 967877.938 | 28279146.000 | 99.8442  |
| 2            |         | 17.857   | 969.046    | 44137.438    | 0.1558   |
| <b>Total</b> |         |          | 968846.983 | 28323283.438 | 100.0000 |

## References:

1. P.-L. Shao, J.-Y. Liao, Y. A. Ho, Y. Zhao, *Angew. Chem. Int. Ed.* **2014**, *53*, 5435.
2. A. Carrer, J.-D. Brion, S. Messaoudi, M. Alami, *Org. Lett.* **2013**, *15*, 5606.
3. Z.-Y. Xue, Y. Jiang, X.-Z. Peng, W.-C. Yuan, X.-M. Zhang, *Adv. Synth. Catal.* **2010**, *352*, 2132.
4. Q.-A. Chen, M.-W. Chen, C.-B. Yu, L. Shi, D.-S. Wang, Y. Yang, Y.-G. Zhou, *J. Am. Chem. Soc.* **2011**, *133*, 16432.
5. M. Rueping, A. P. Antonchick, T. Theissmann, *Angew. Chem. Int. Ed.* **2006**, *45*, 6751.

## 7. Crystal analysis of 3g:

Bond precision: C-C = 0.0130 Å      Wavelength=0.71073

Cell:            a=4.4197(5)      b=11.6677(13)      c=22.915(2)  
                   alpha=90            beta=90            gamma=90

Temperature:    173 K

|                | Calculated      | Reported        |
|----------------|-----------------|-----------------|
| Volume         | 1181.7(2)       | 1181.7(2)       |
| Space group    | P 21 21 21      | P 21 21 21      |
| Hall group     | P 2ac 2ab       | P 2ac 2ab       |
| Moiety formula | C14 H10 Br N O2 | C14 H10 Br N O2 |
| Sum formula    | C14 H10 Br N O2 | C14 H10 Br N O2 |
| Mr             | 304.13          | 304.14          |
| Dx, g cm-3     | 1.709           | 1.710           |
| Z              | 4               | 4               |
| Mu (mm-1)      | 3.470           | 3.470           |
| F000           | 608.0           | 608.0           |
| F000'          | 607.12          |                 |
| h, k, lmax     | 5, 13, 27       | 5, 13, 27       |
| Nref           | 2081 [ 1262]    | 2081            |
| Tmin, Tmax     | 0.439, 0.500    | 0.453, 0.745    |
| Tmin'          | 0.350           |                 |

Correction method= # Reported T Limits: Tmin=0.453 Tmax=0.745  
 AbsCorr = MULTI-SCAN

Data completeness= 1.65/1.00      Theta(max)= 25.002

R(reflections)= 0.0562( 1396)      wR2(reflections)= 0.0994( 2081)

S = 1.021                                  Npar= 163

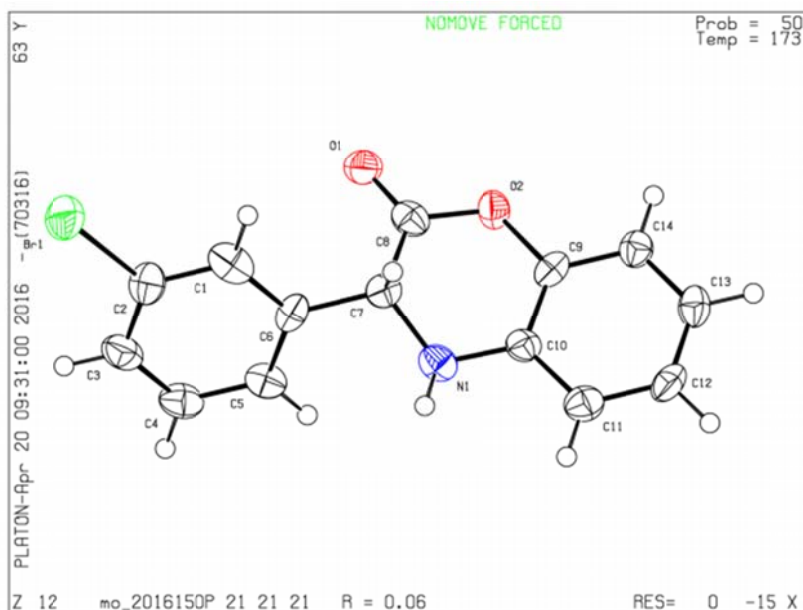

8. Copies of  $^1\text{H}$  NMR and  $^{13}\text{C}$  NMR spectra:

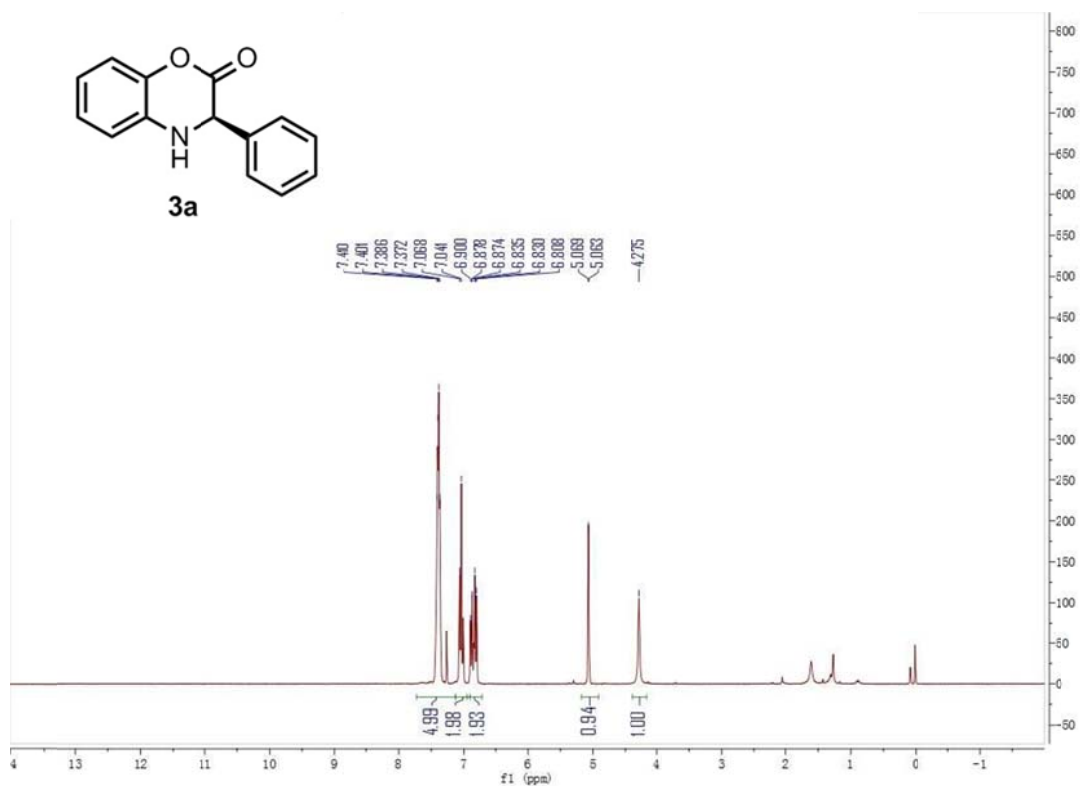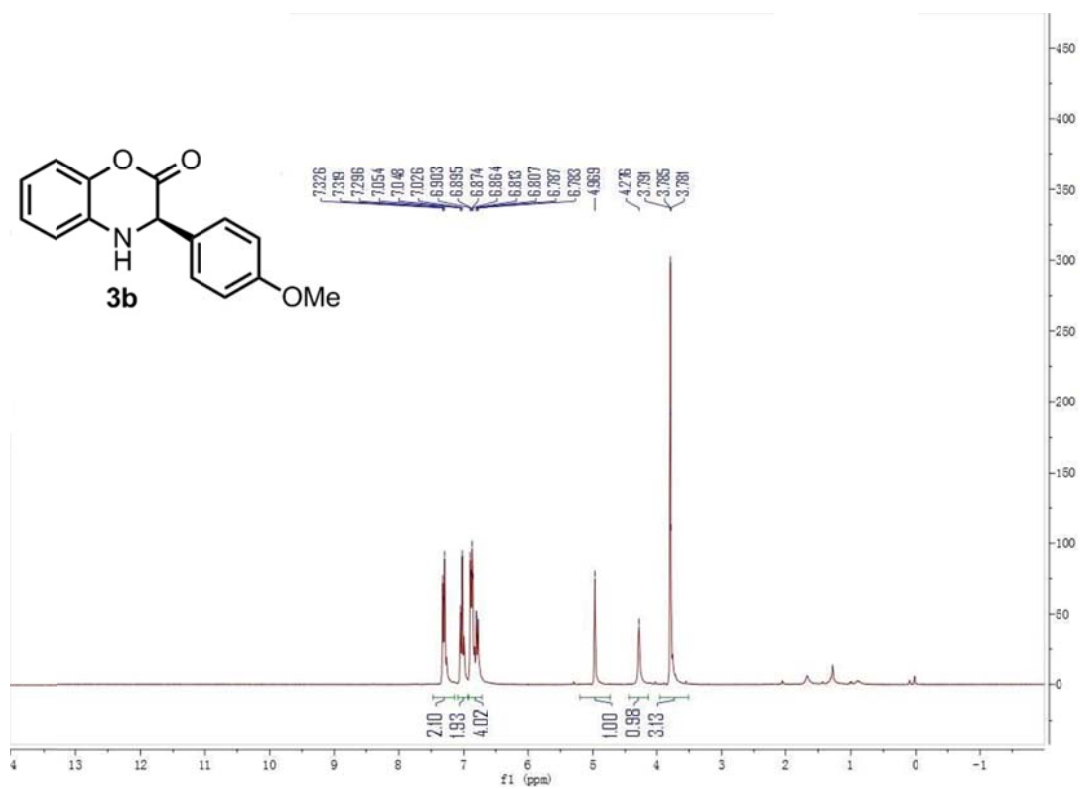

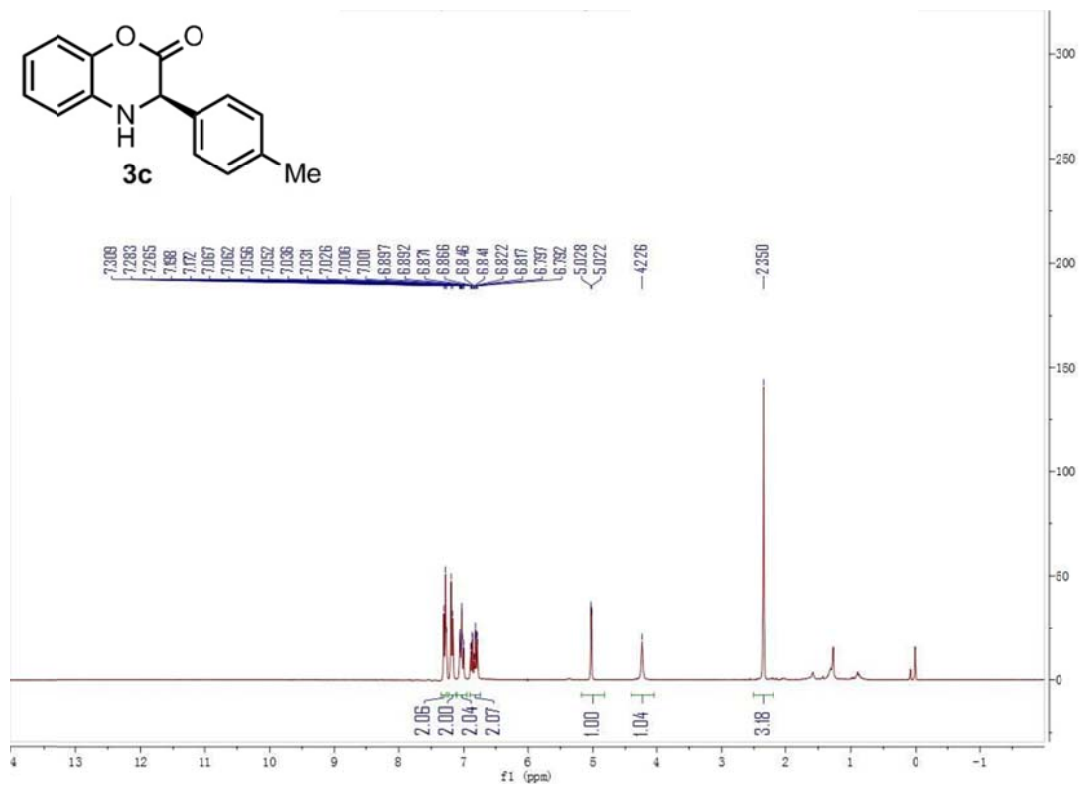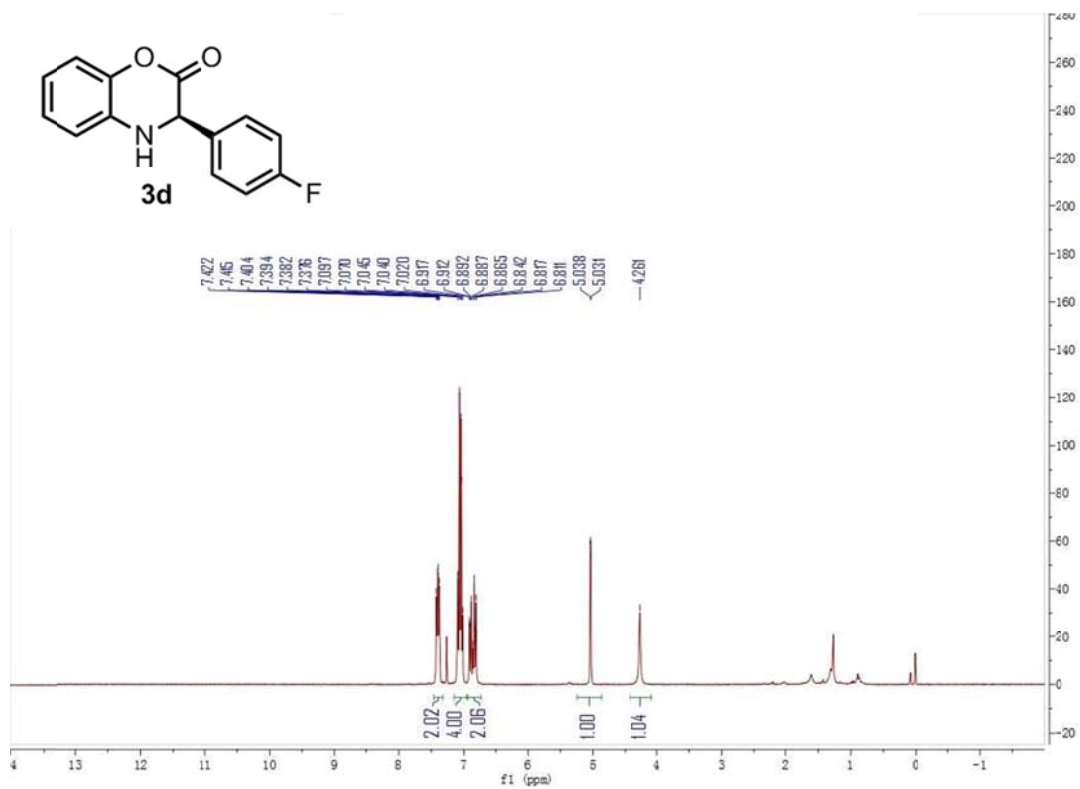

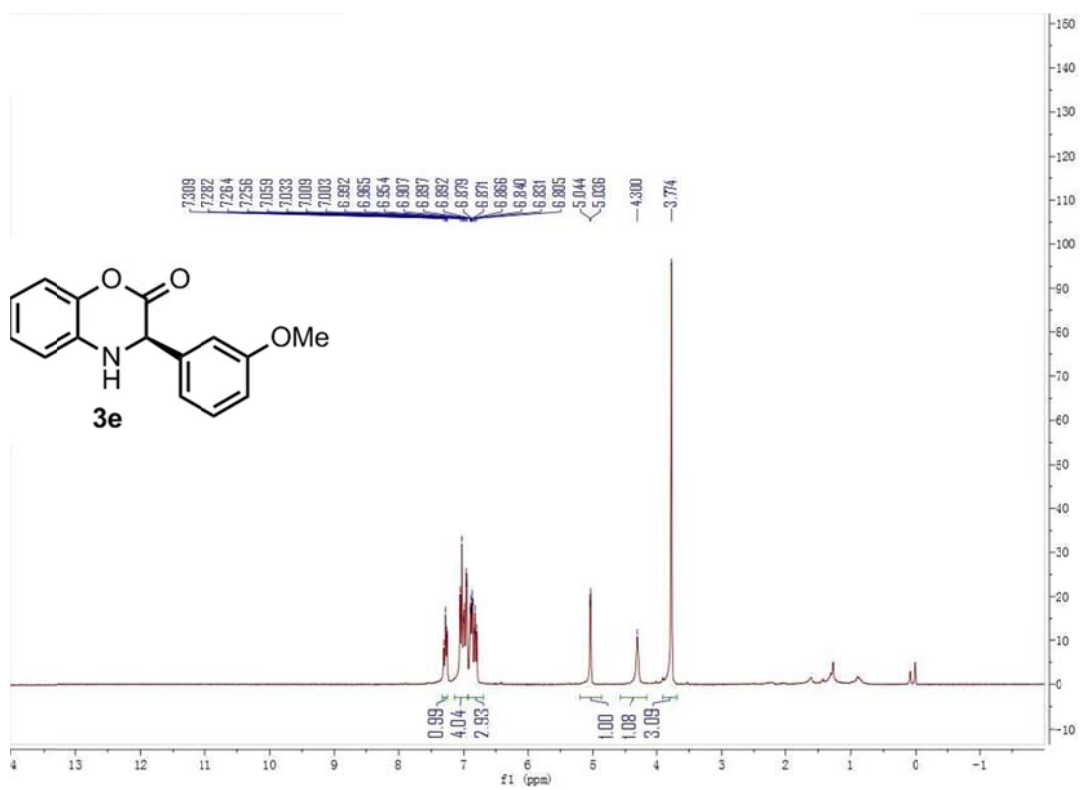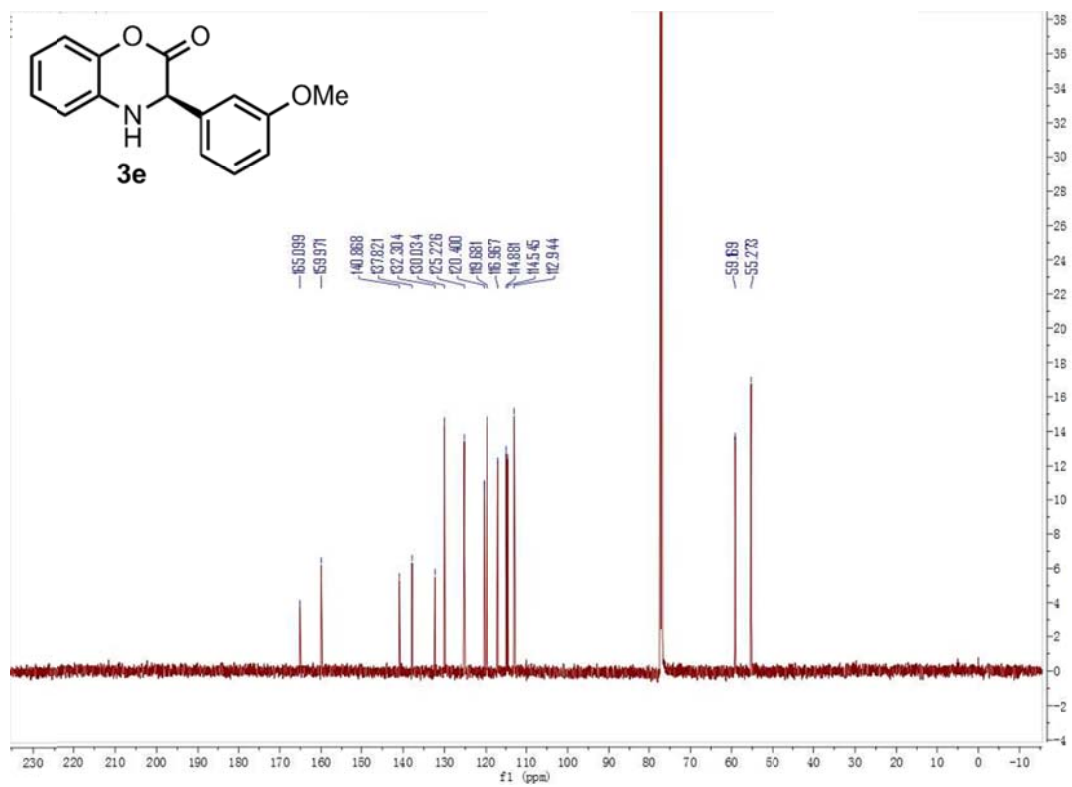

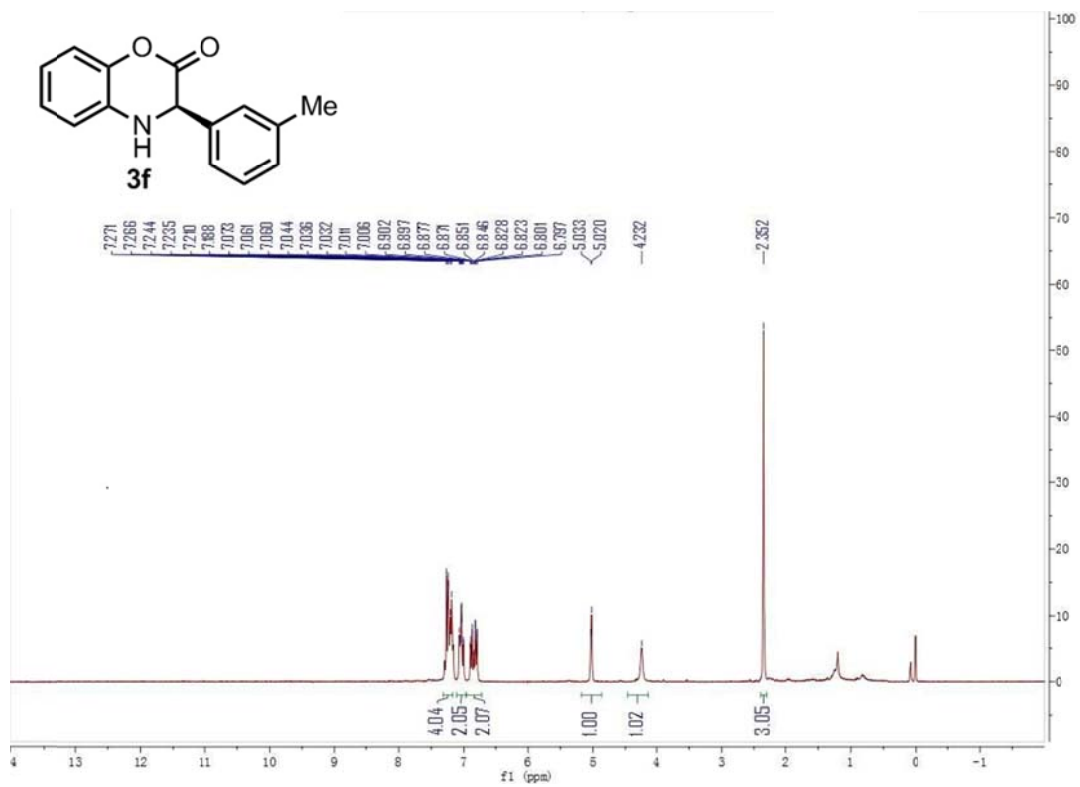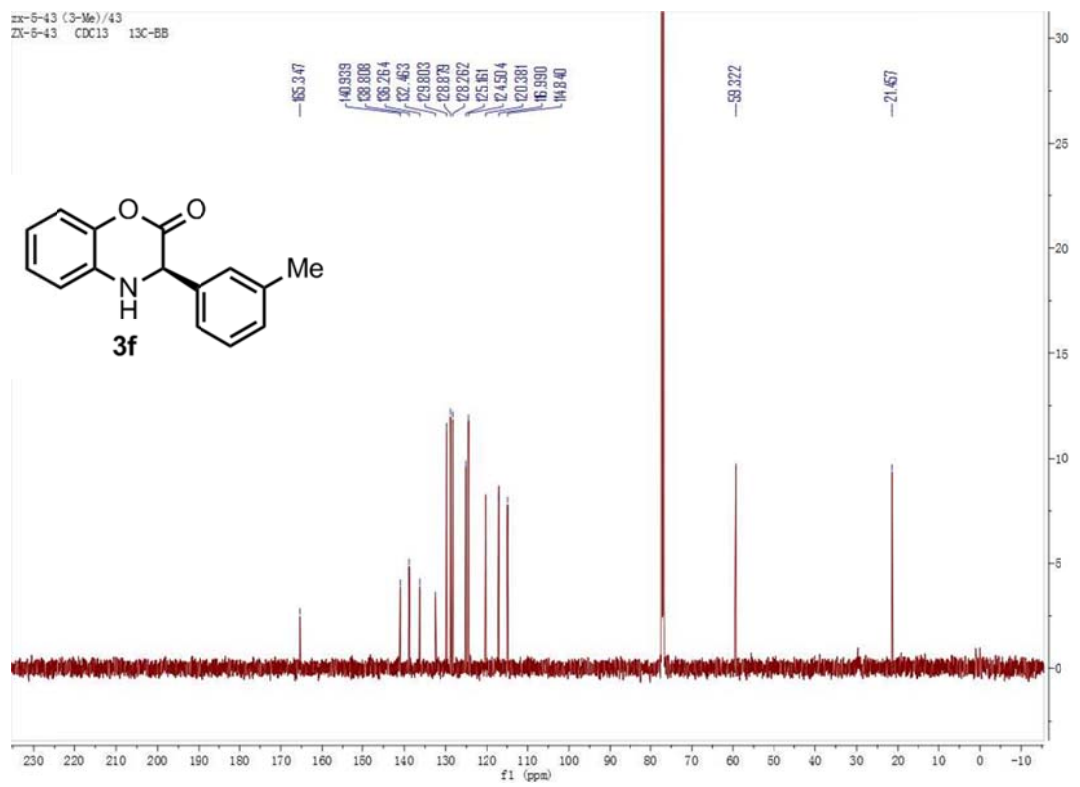



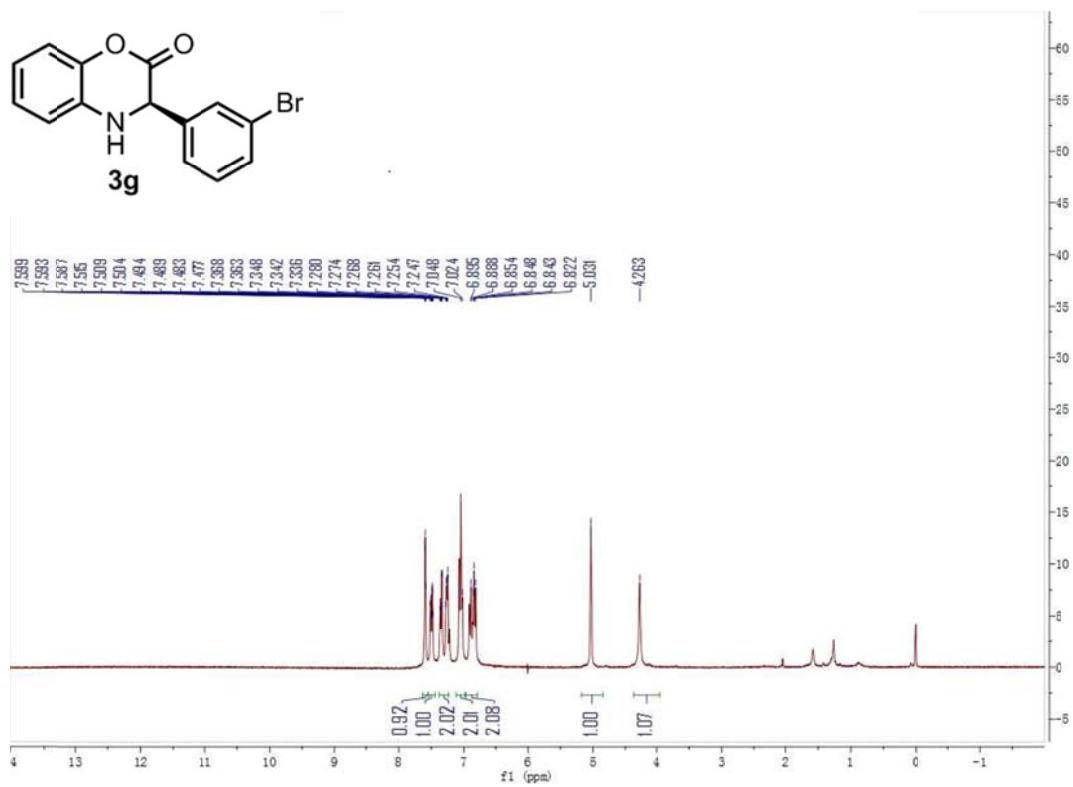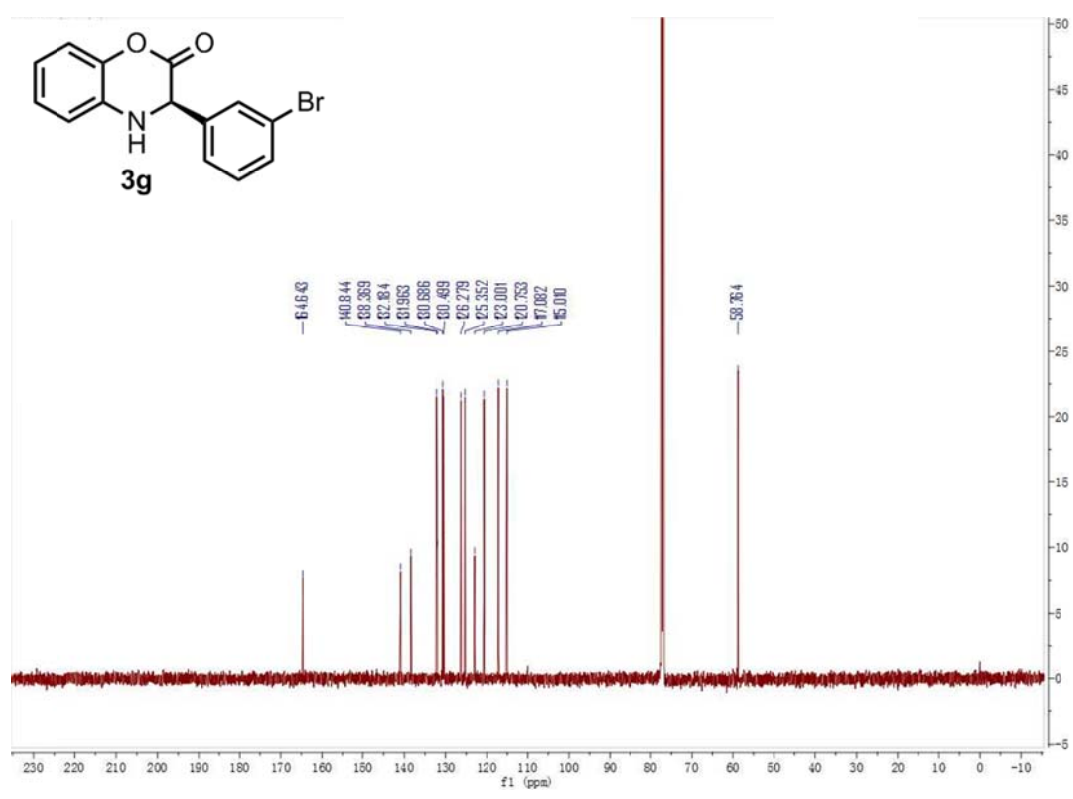

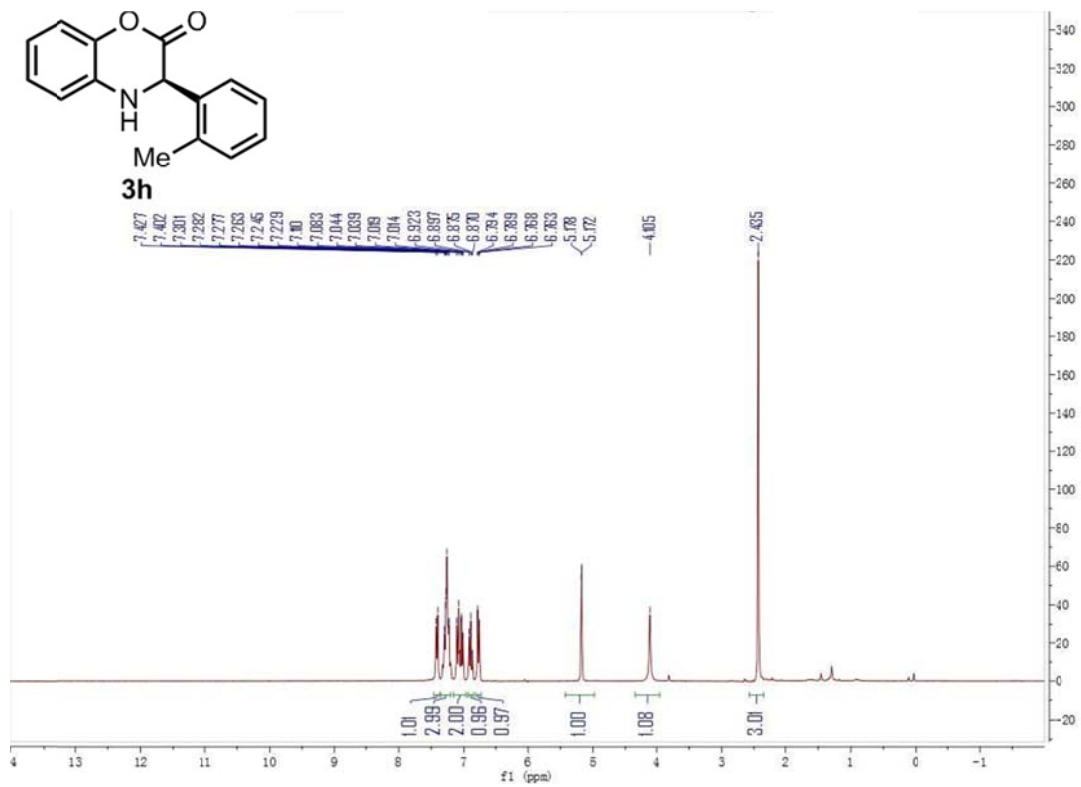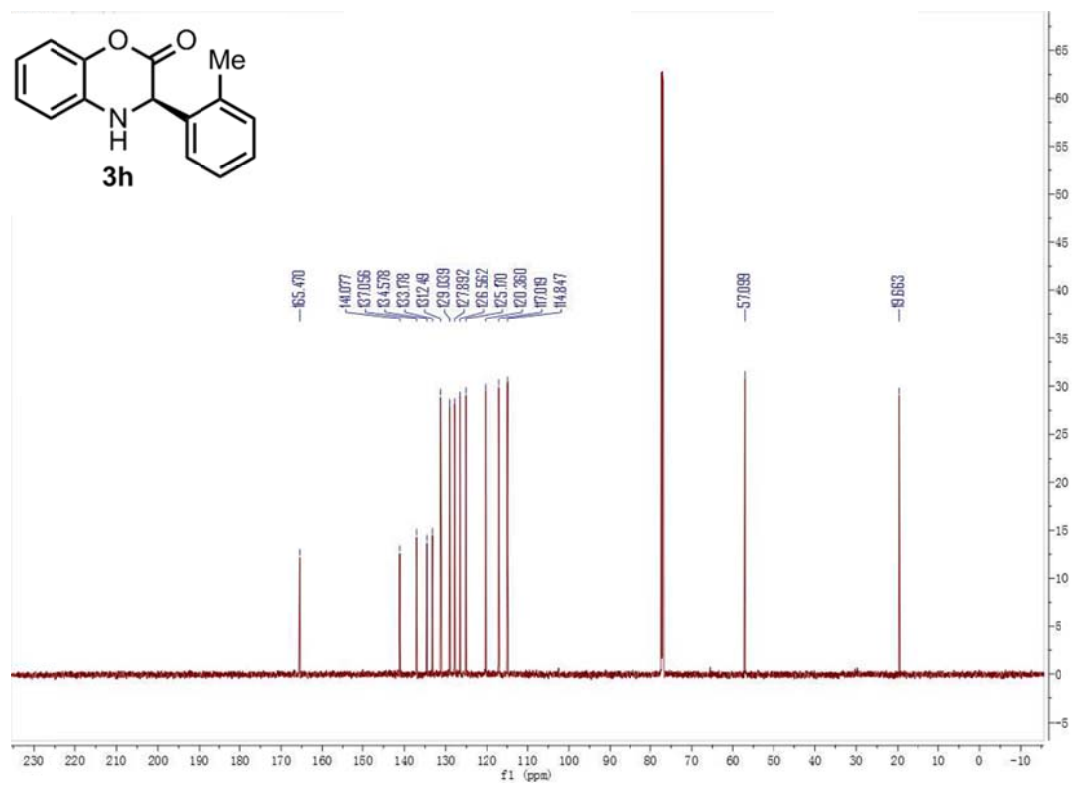

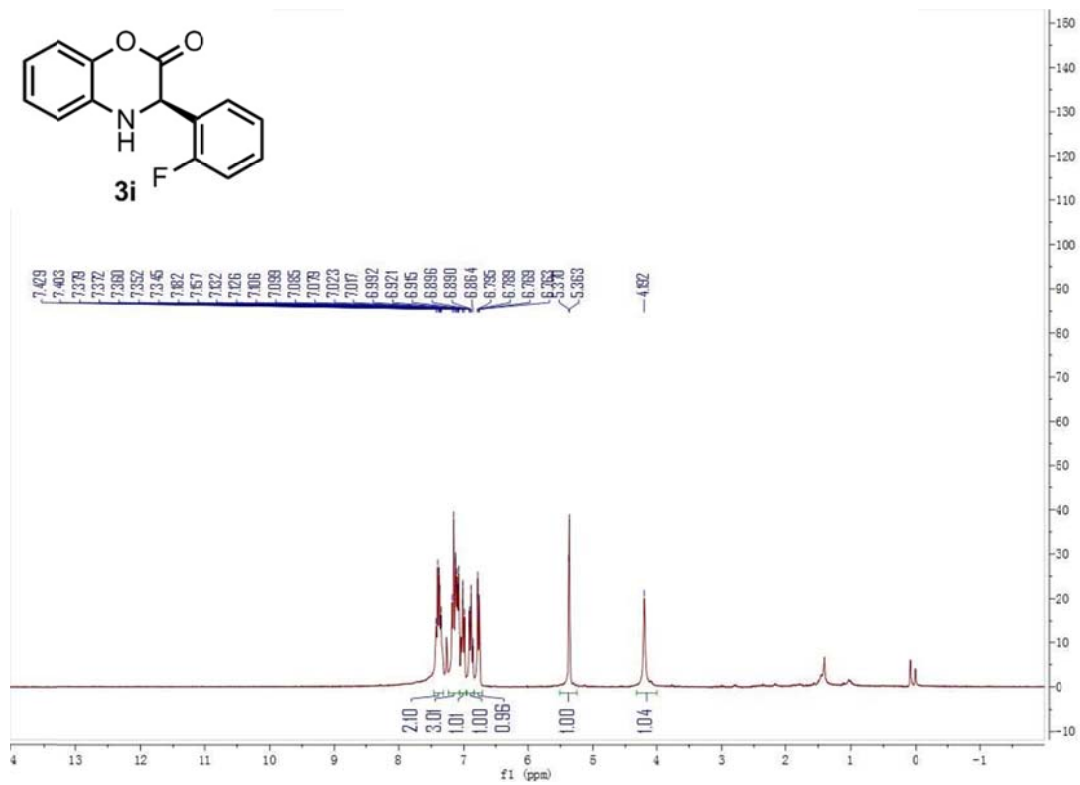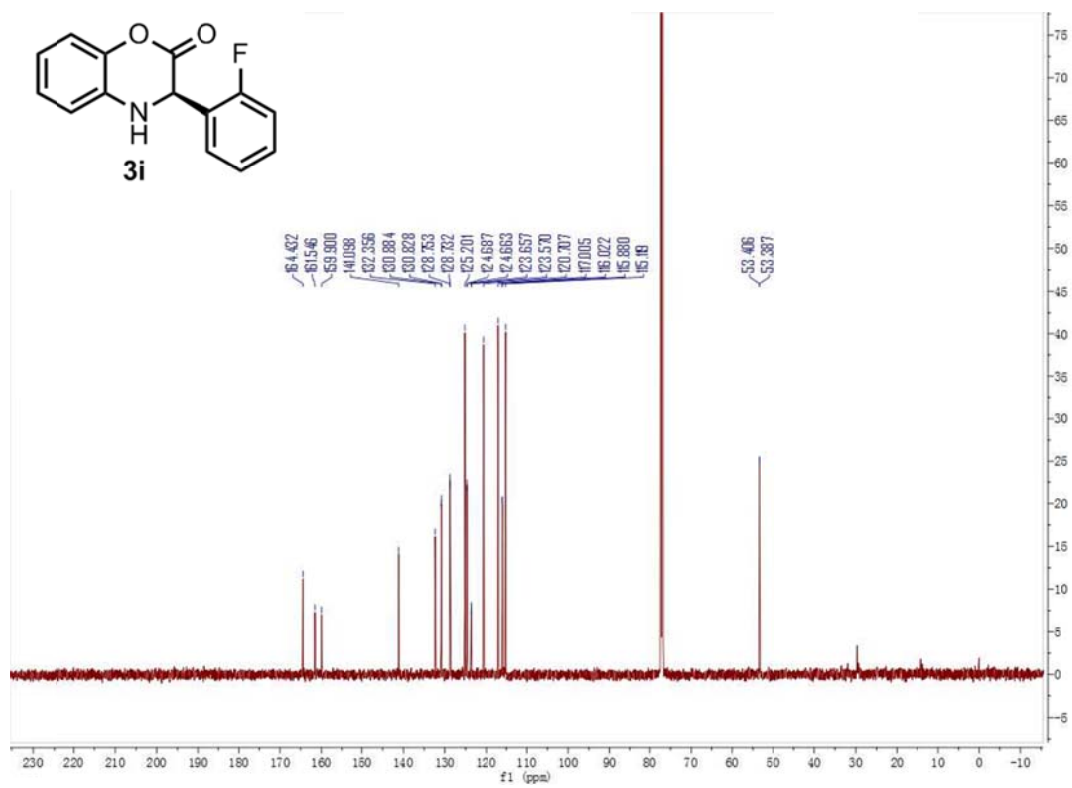

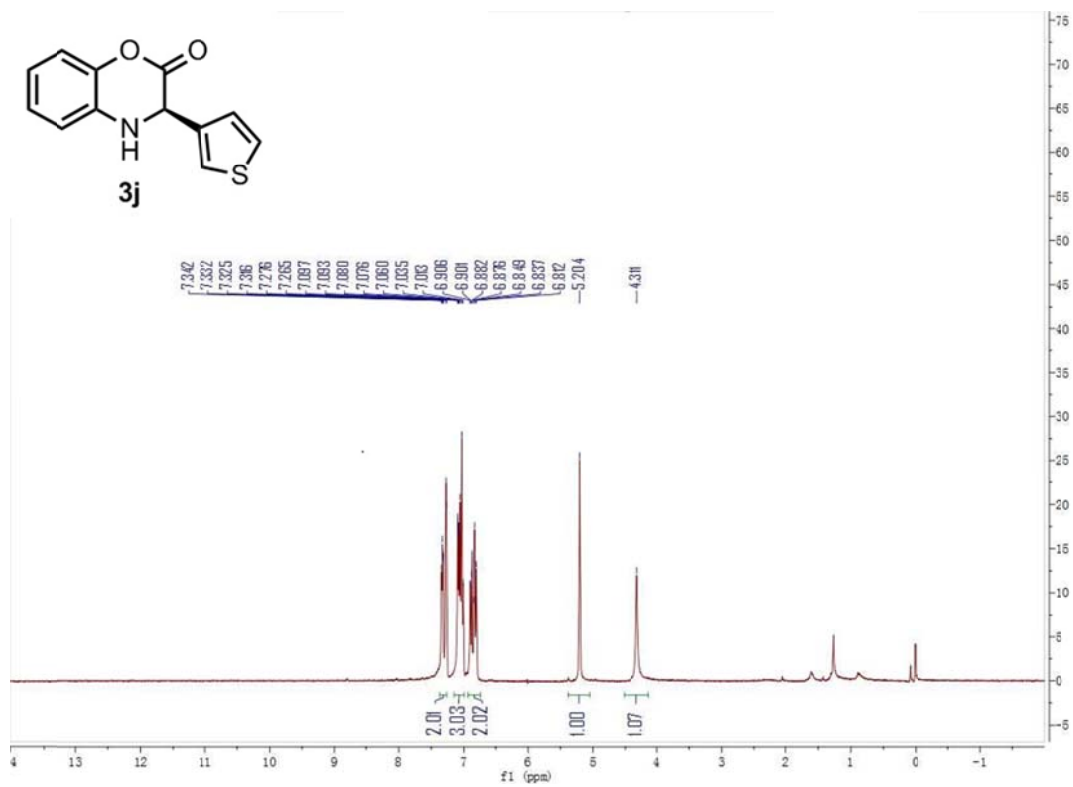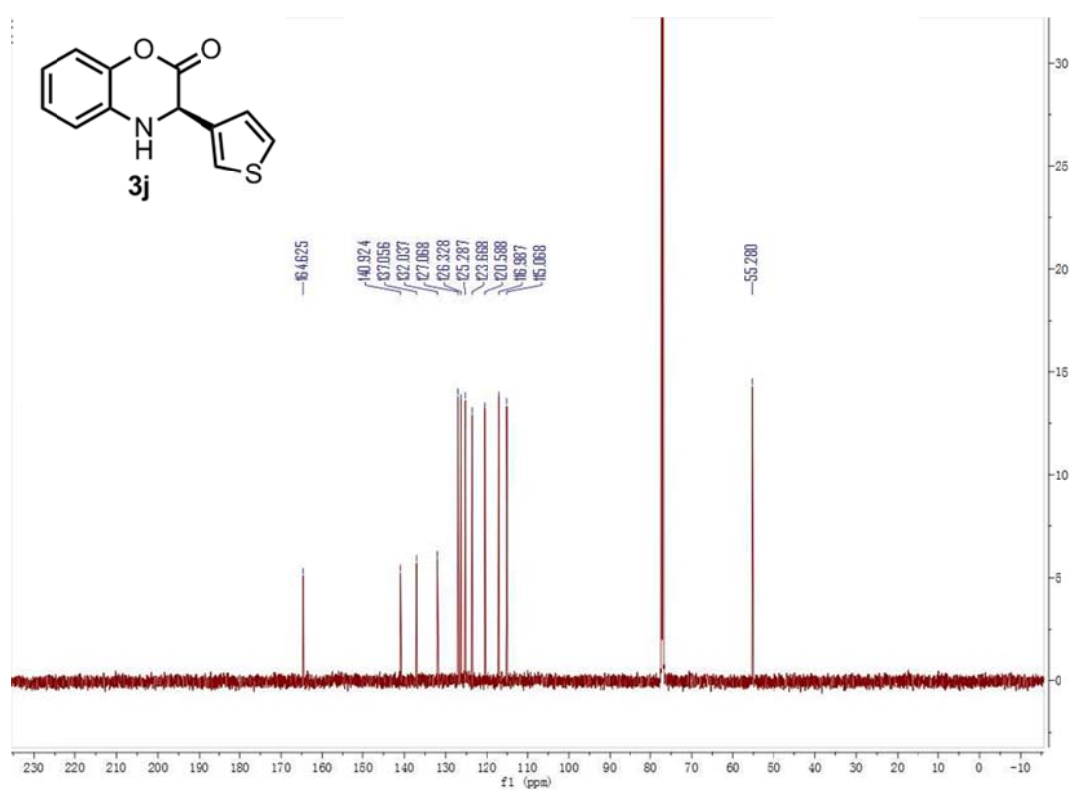

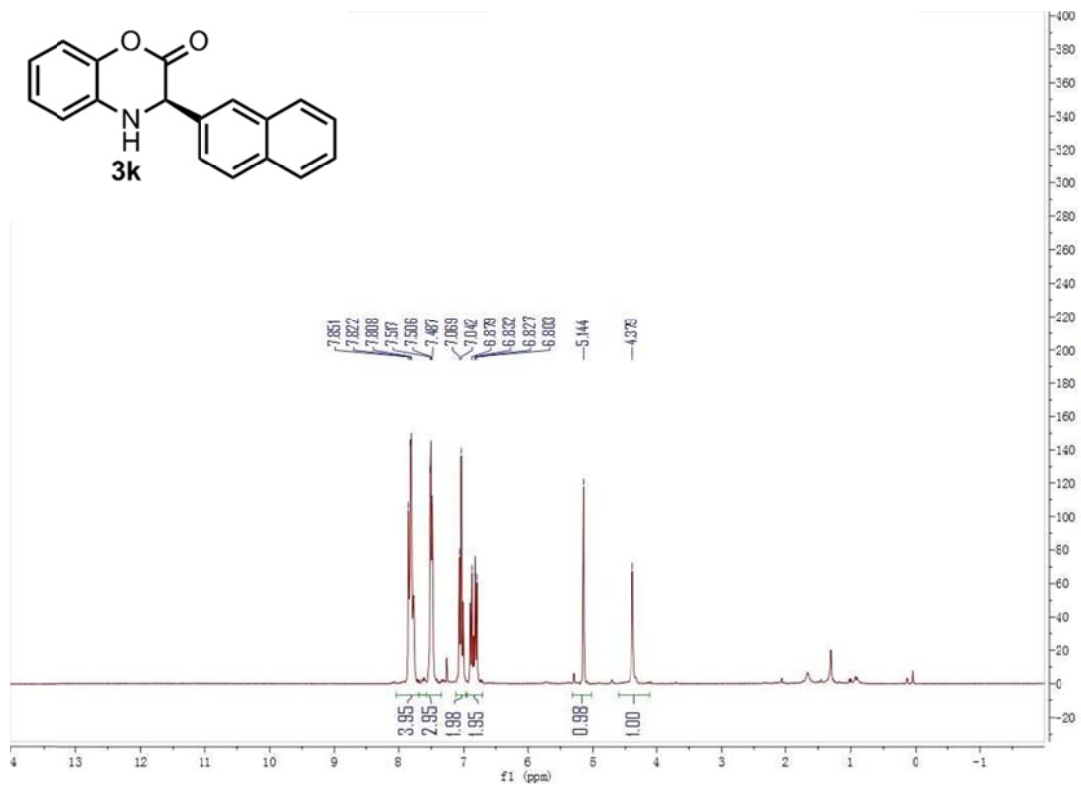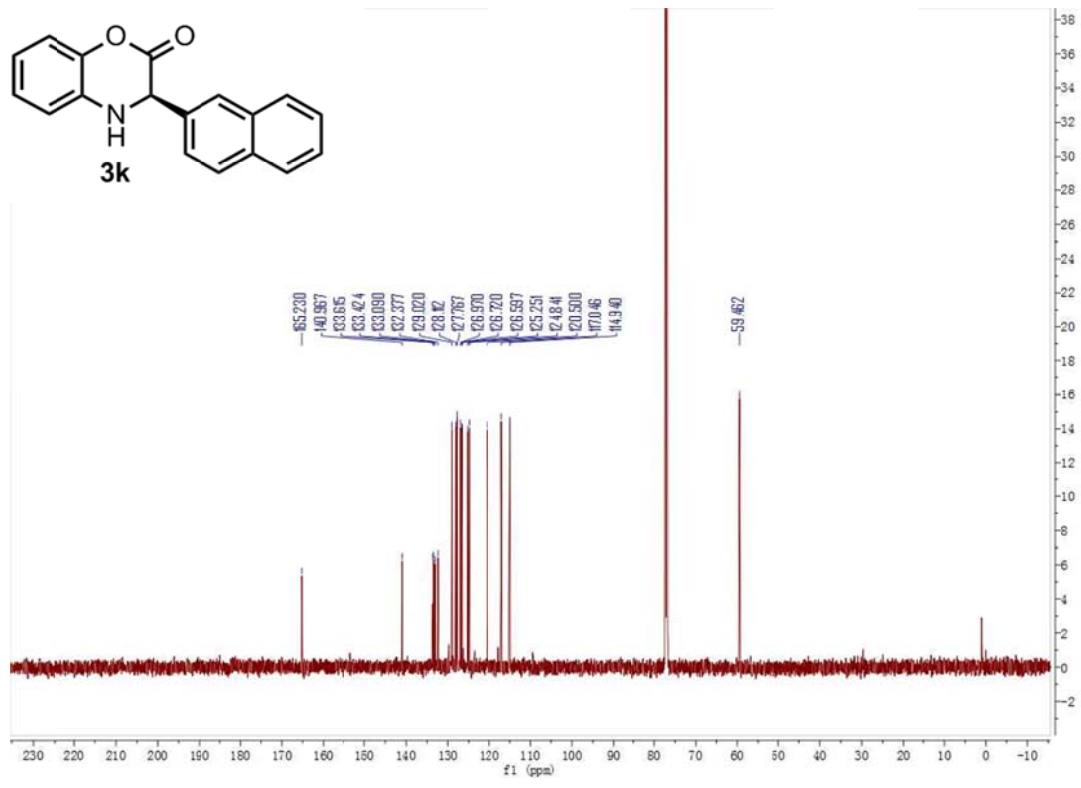

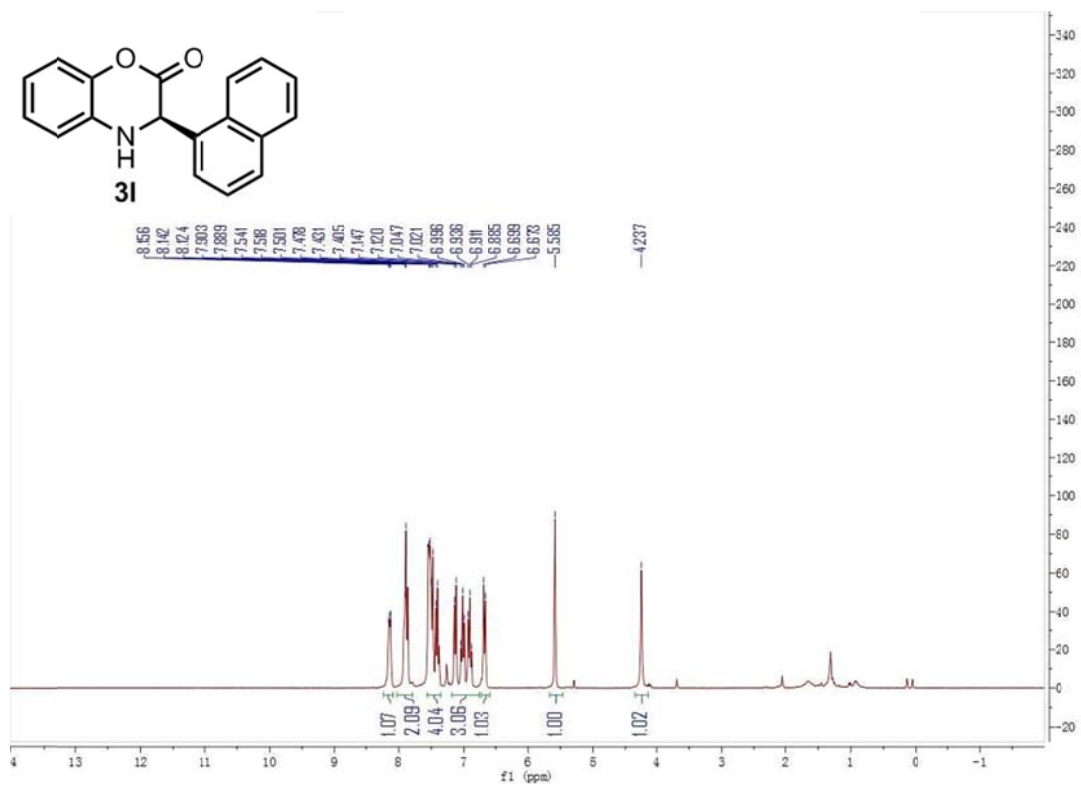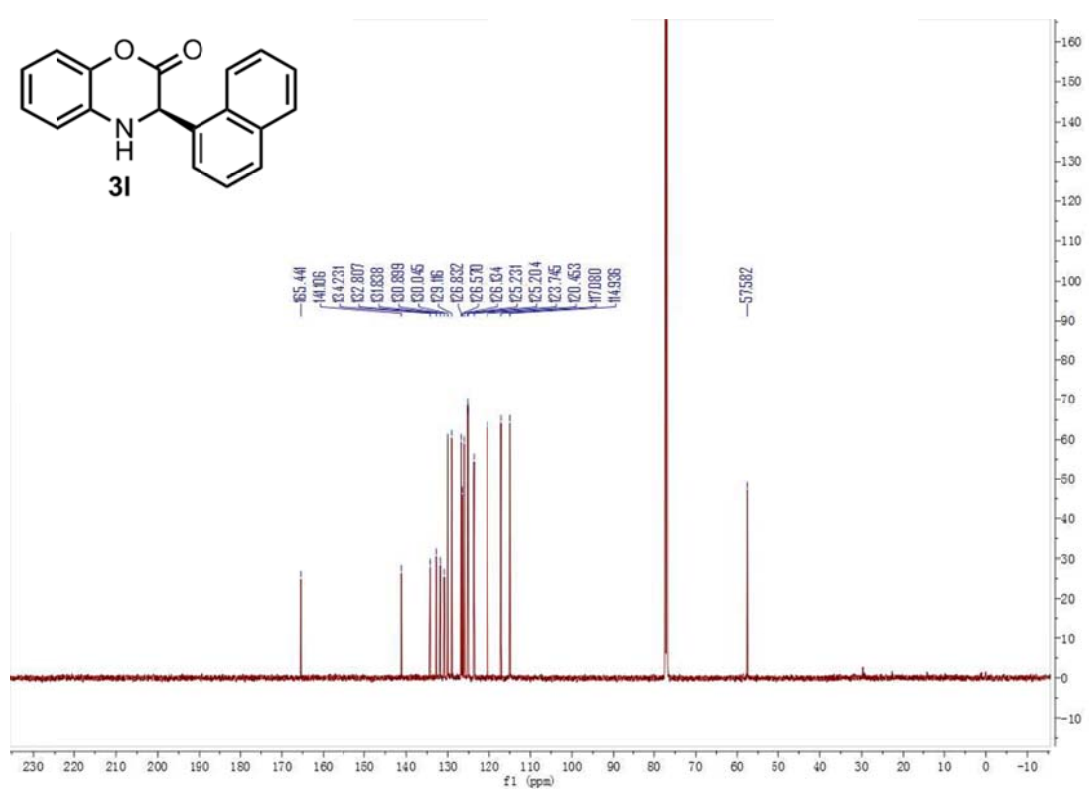

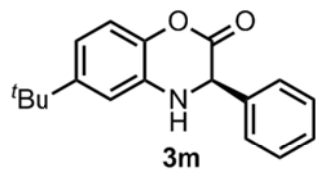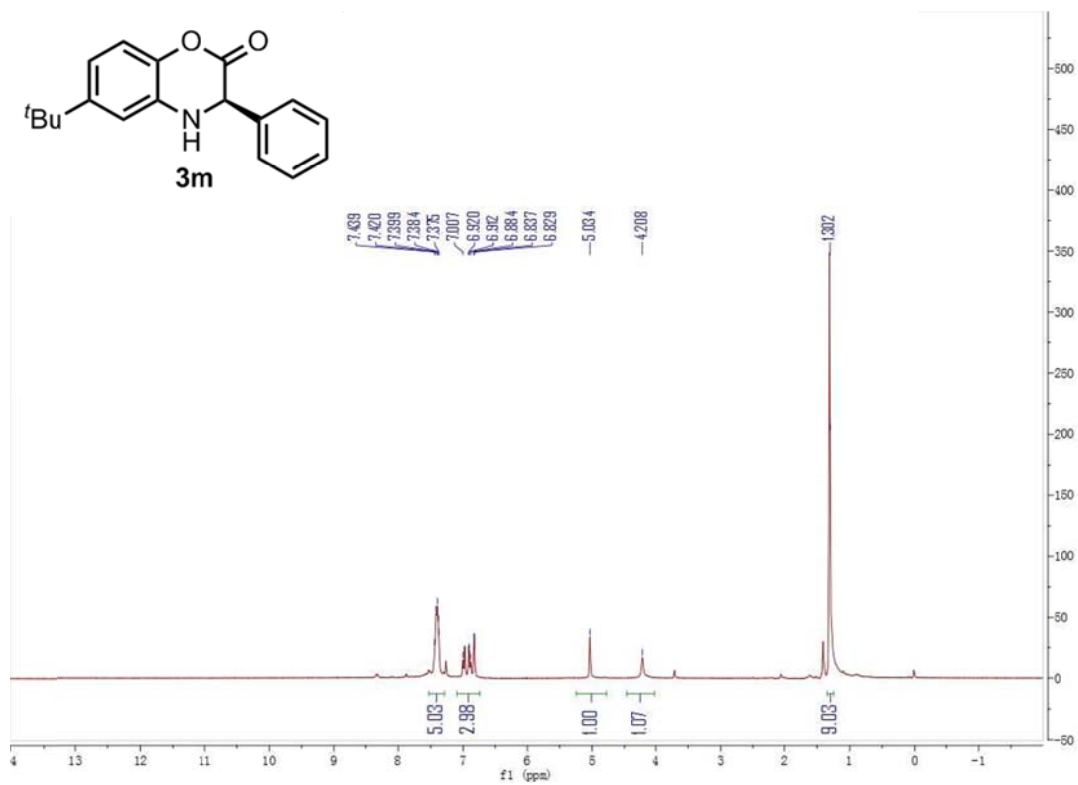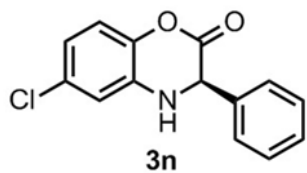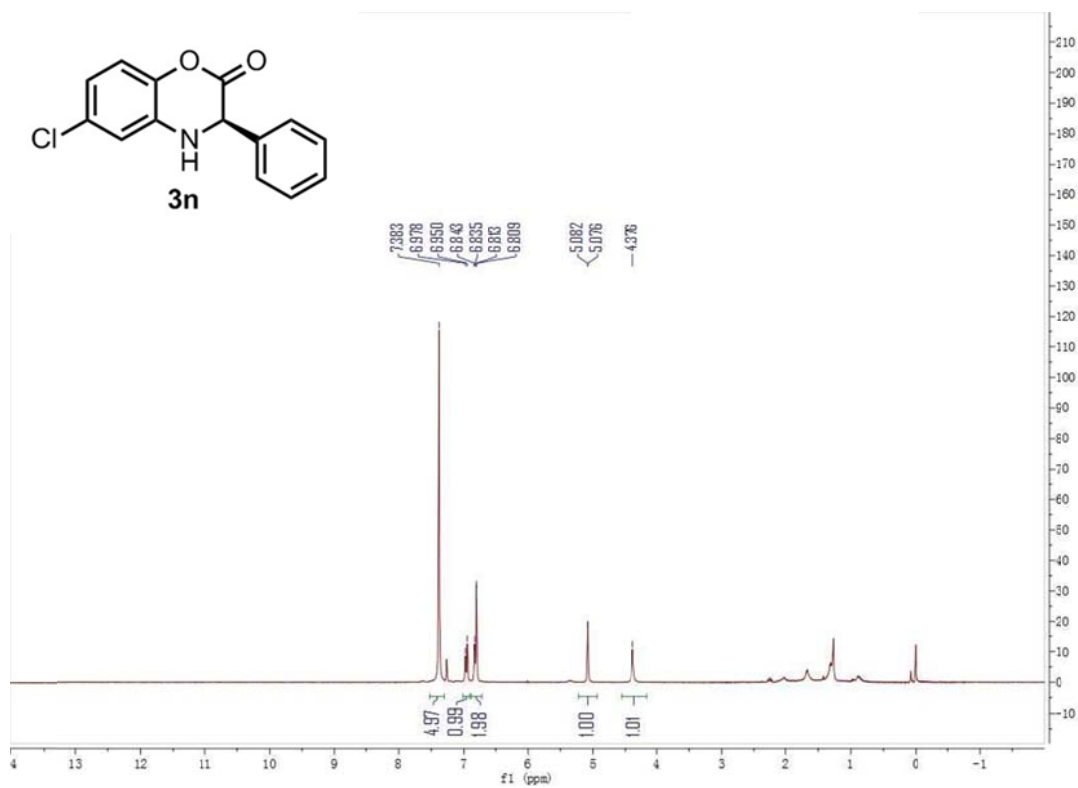

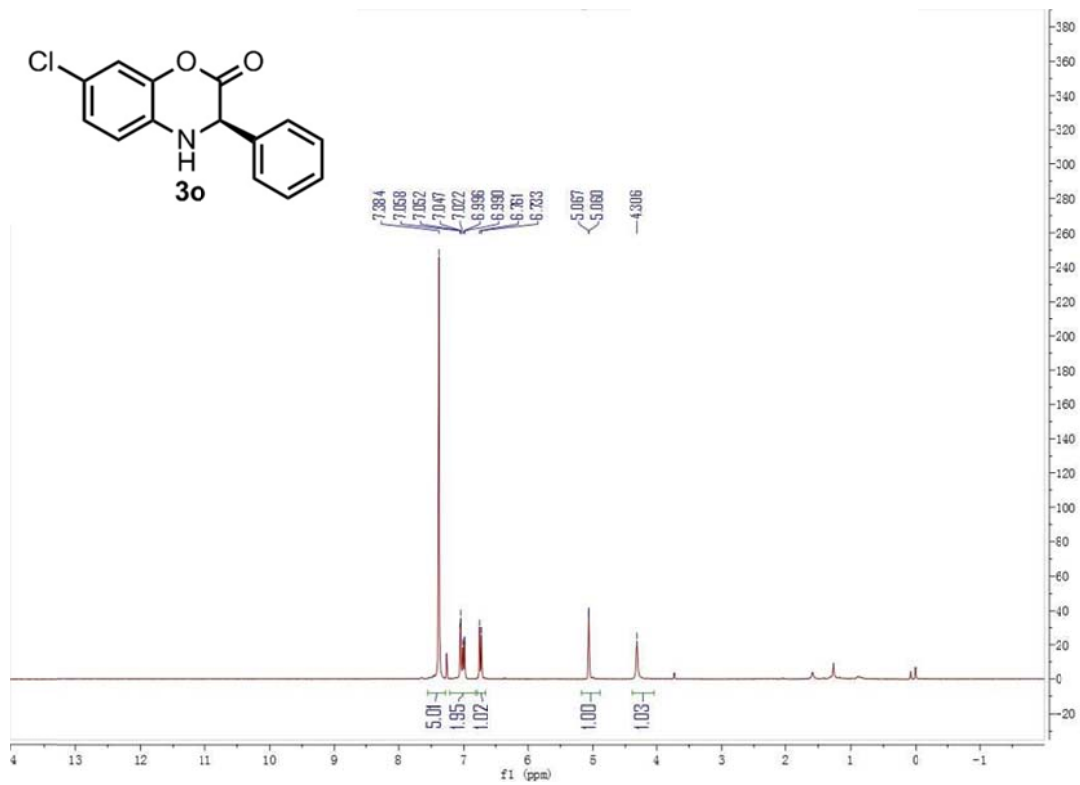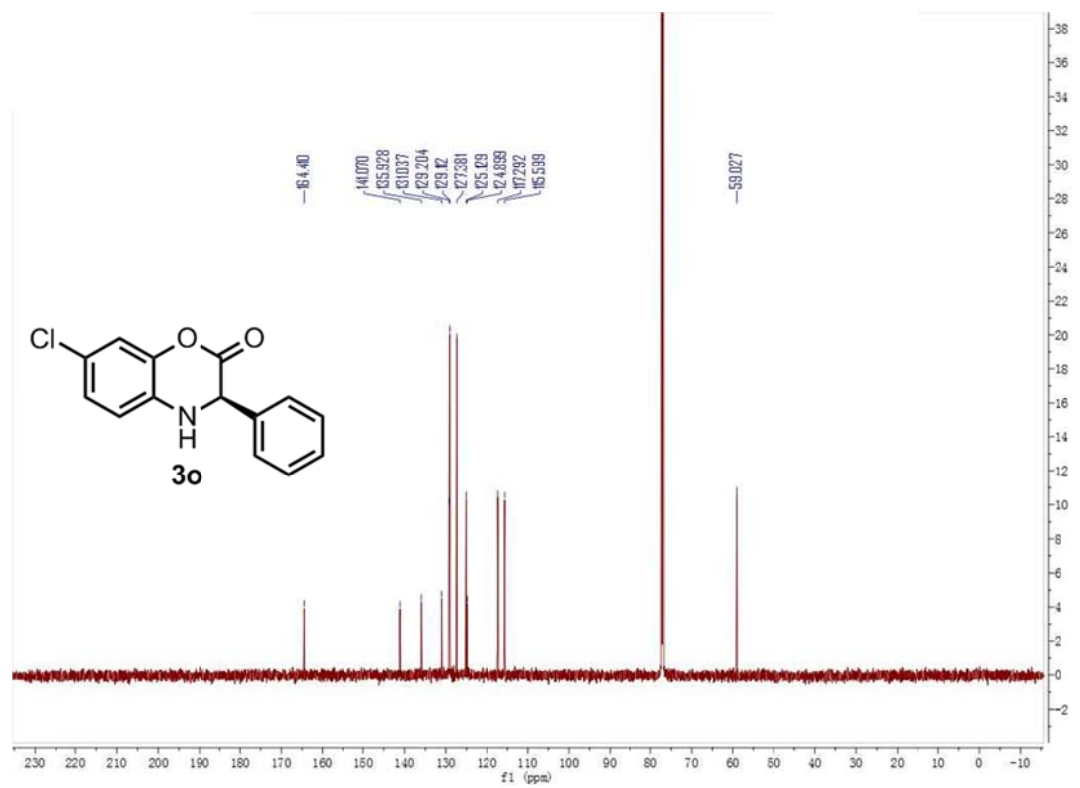



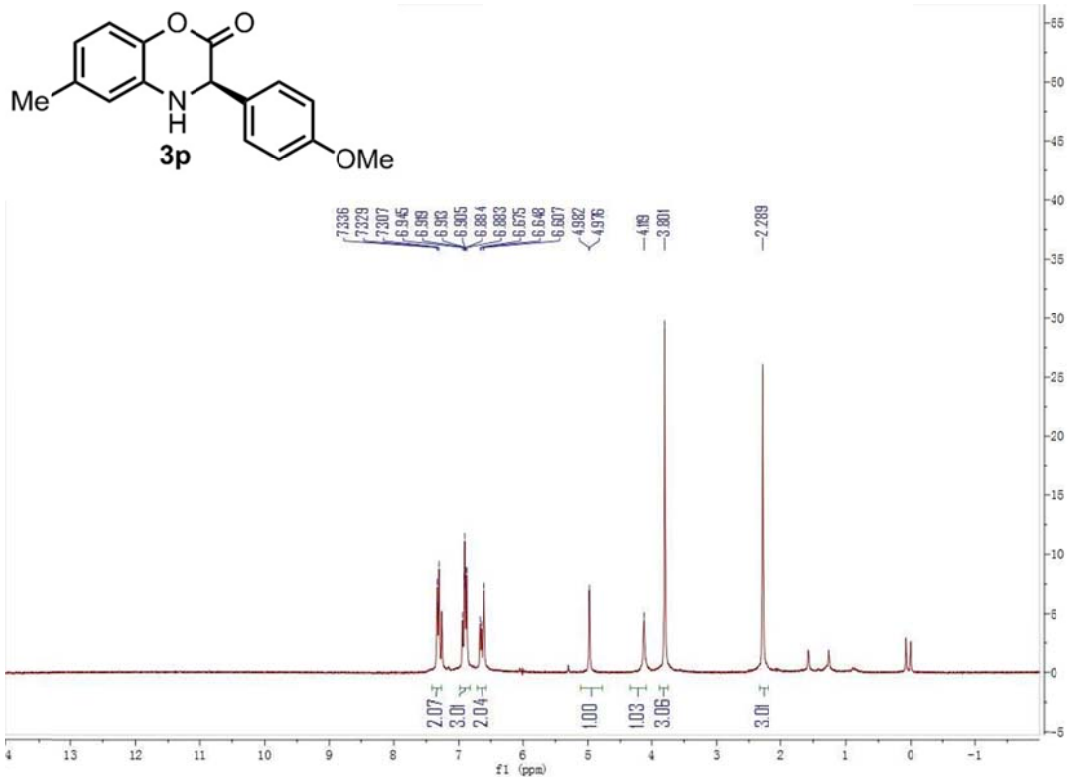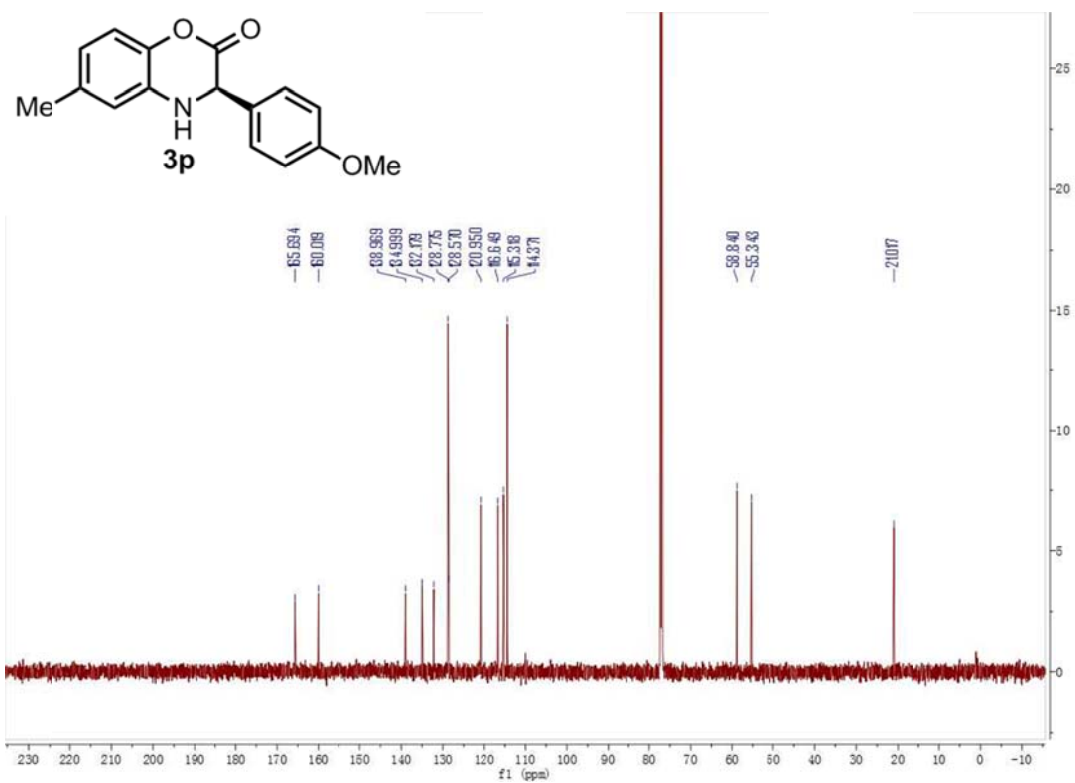

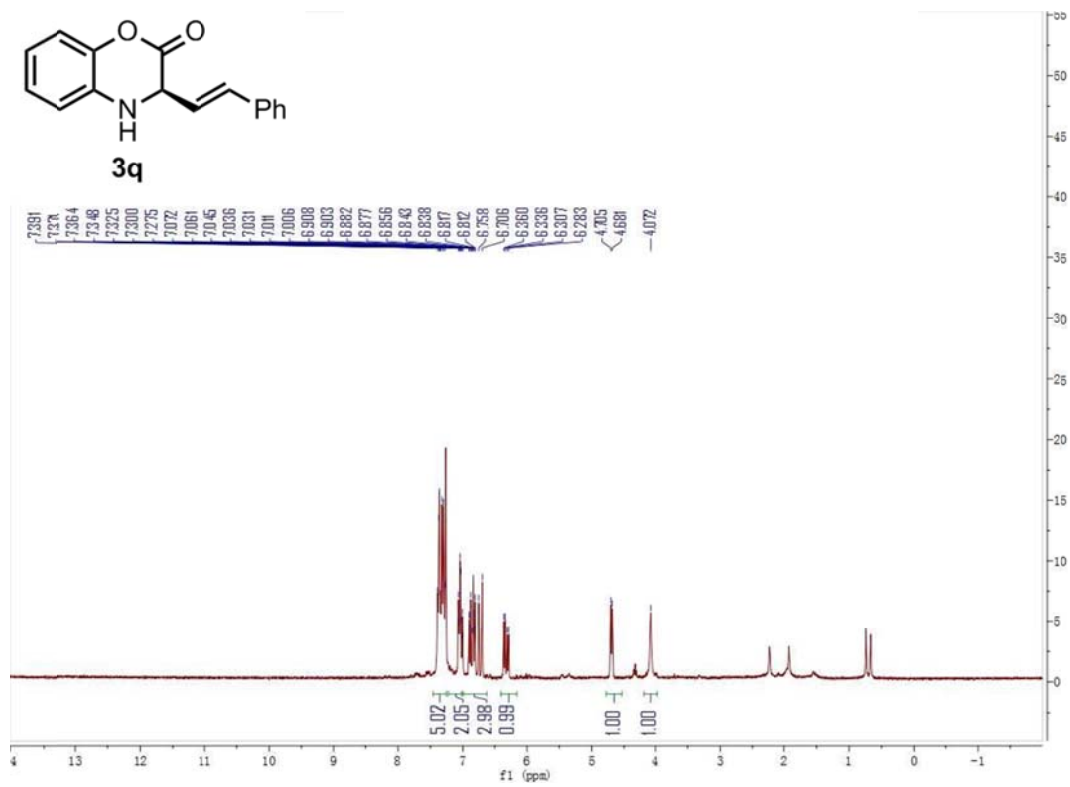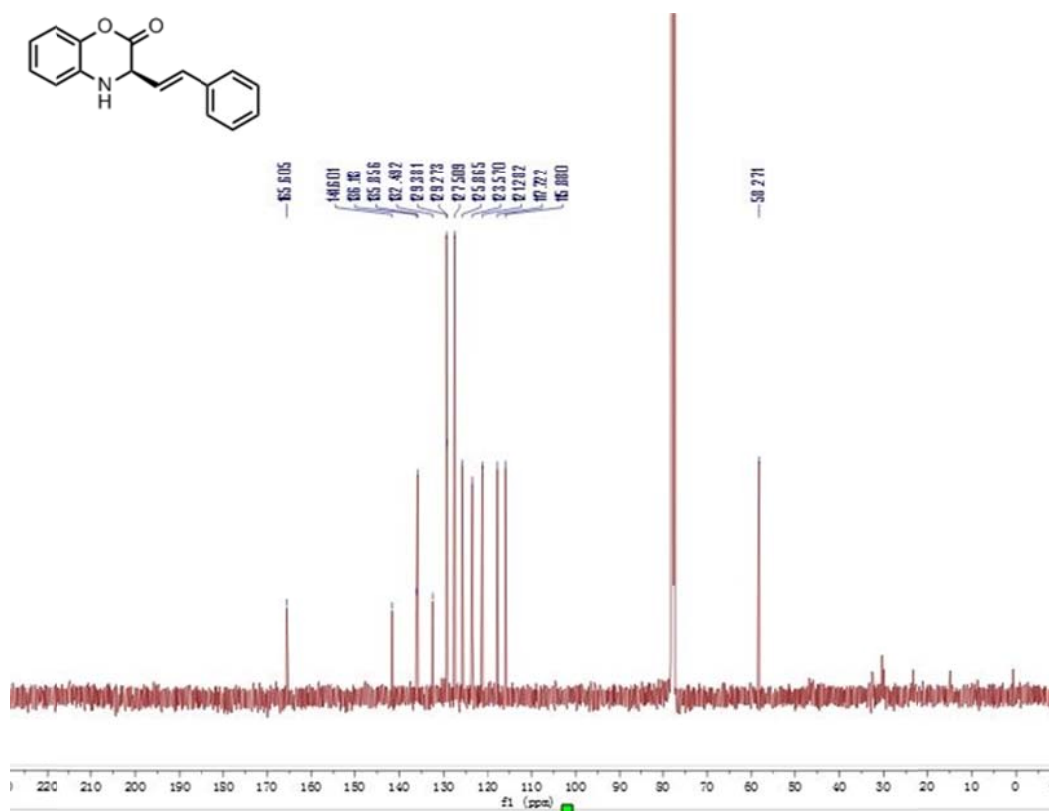

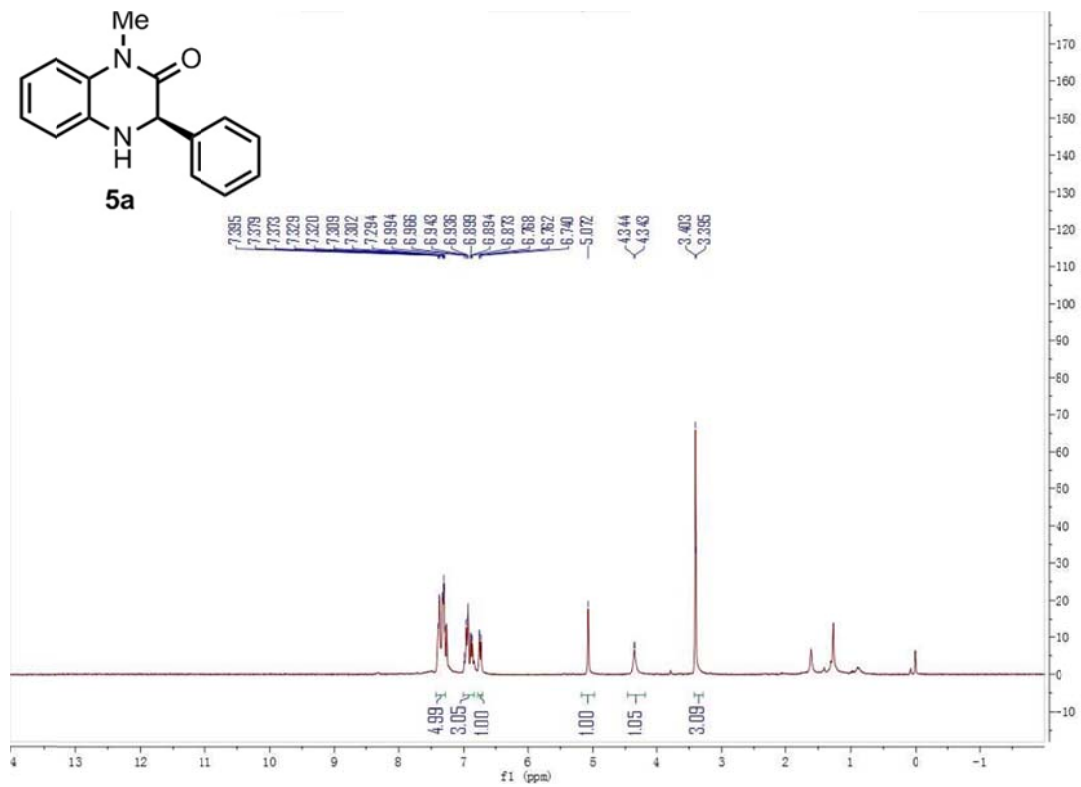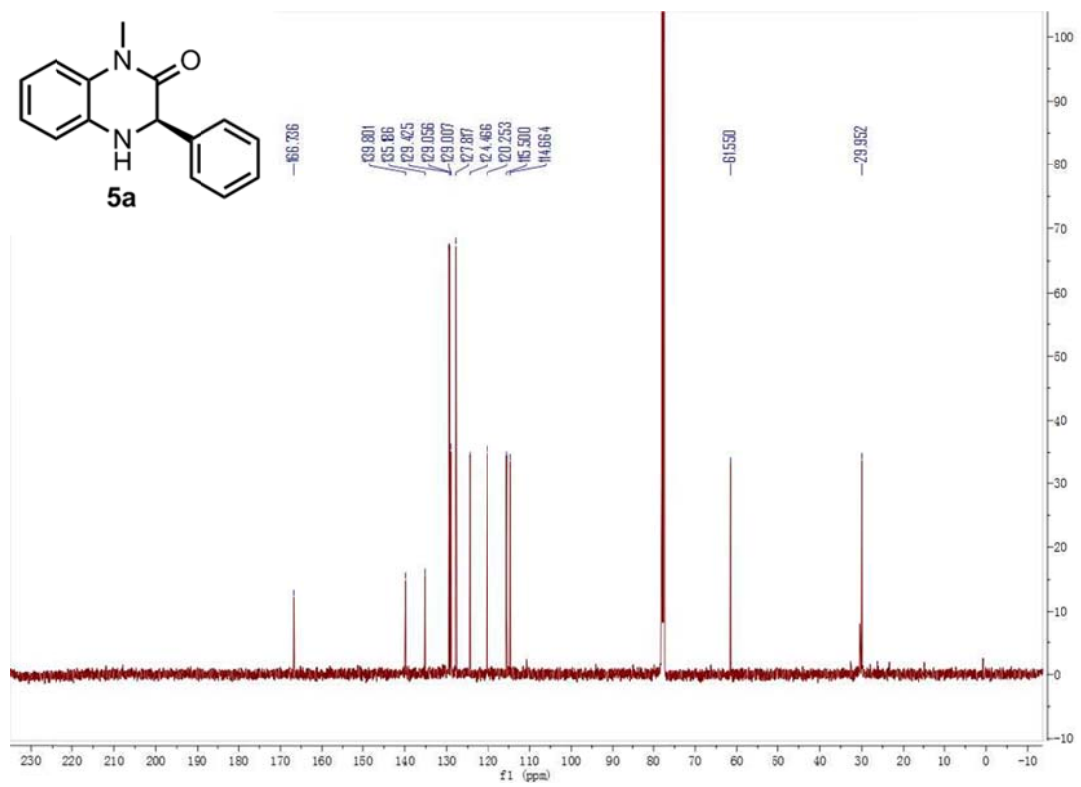

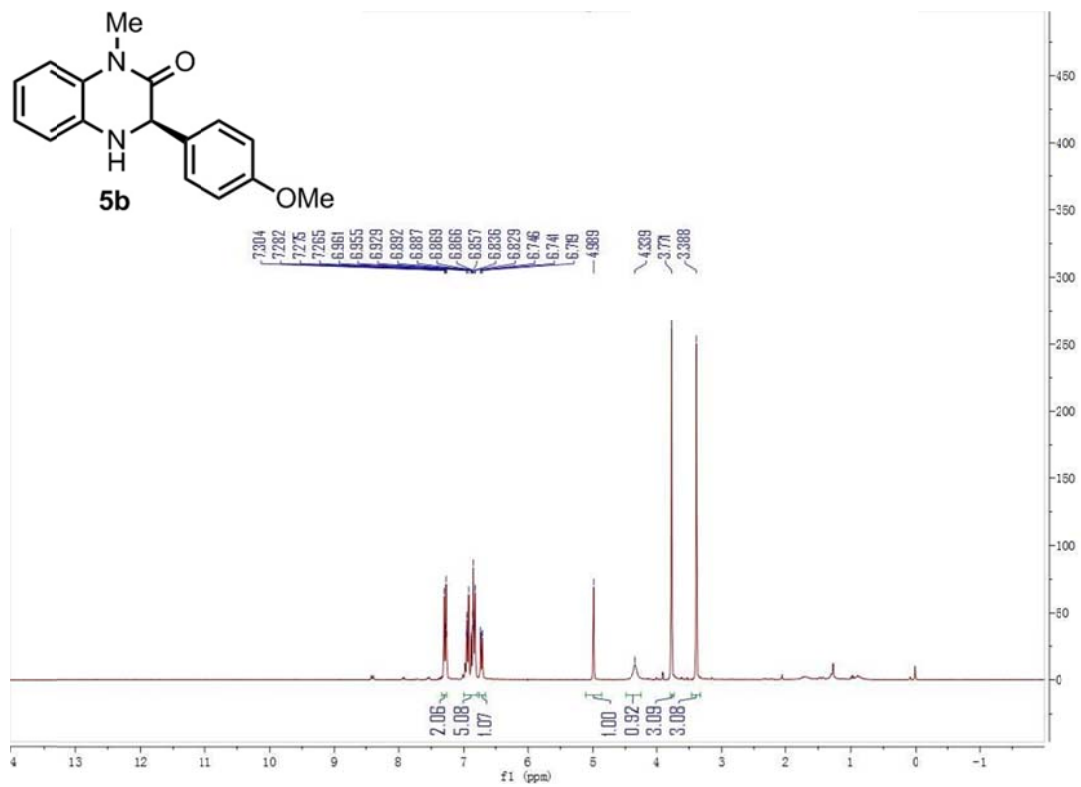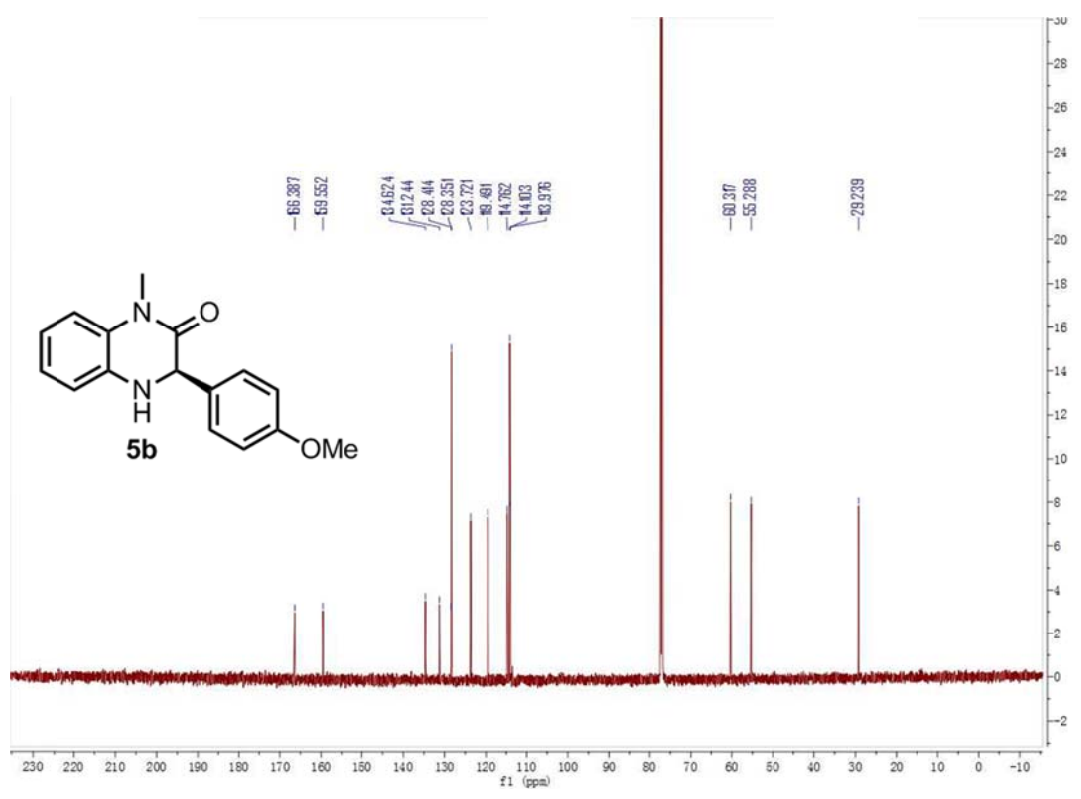

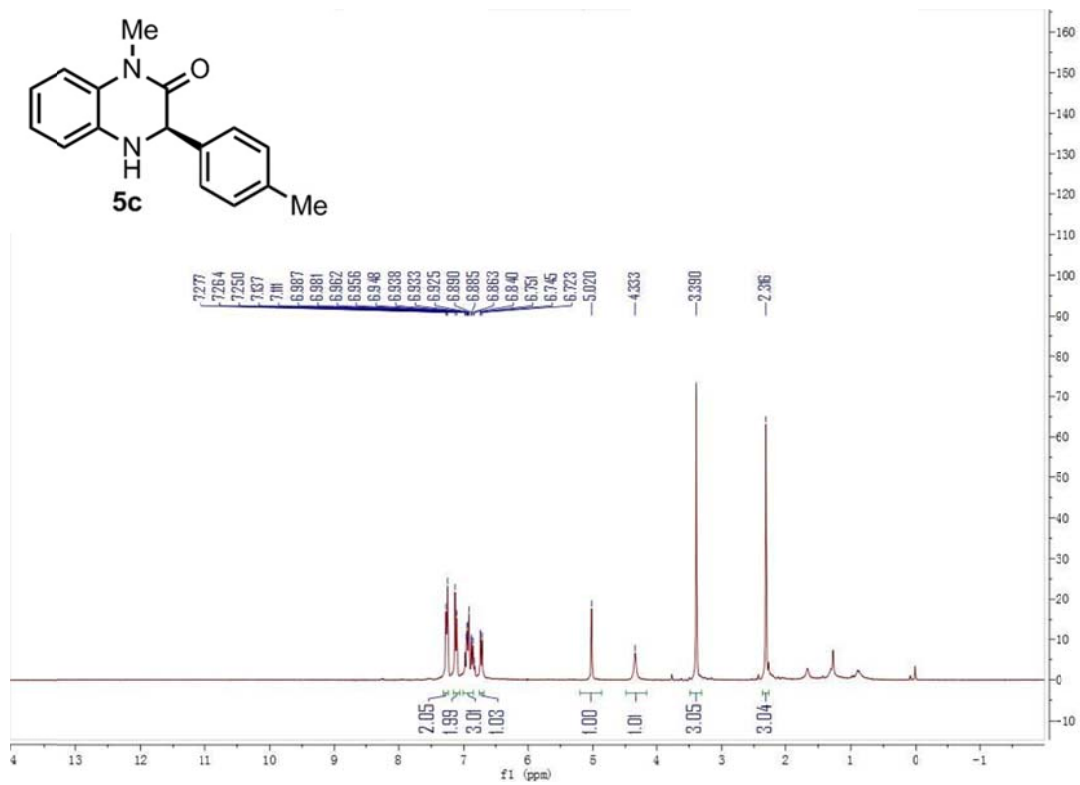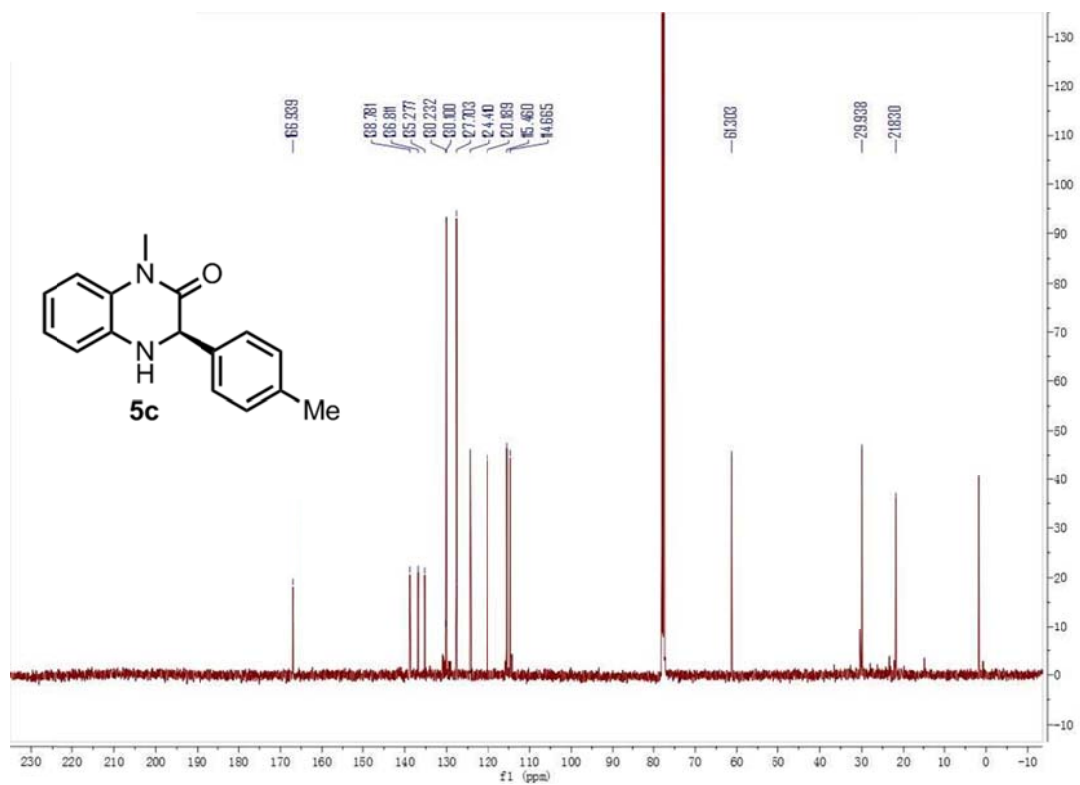

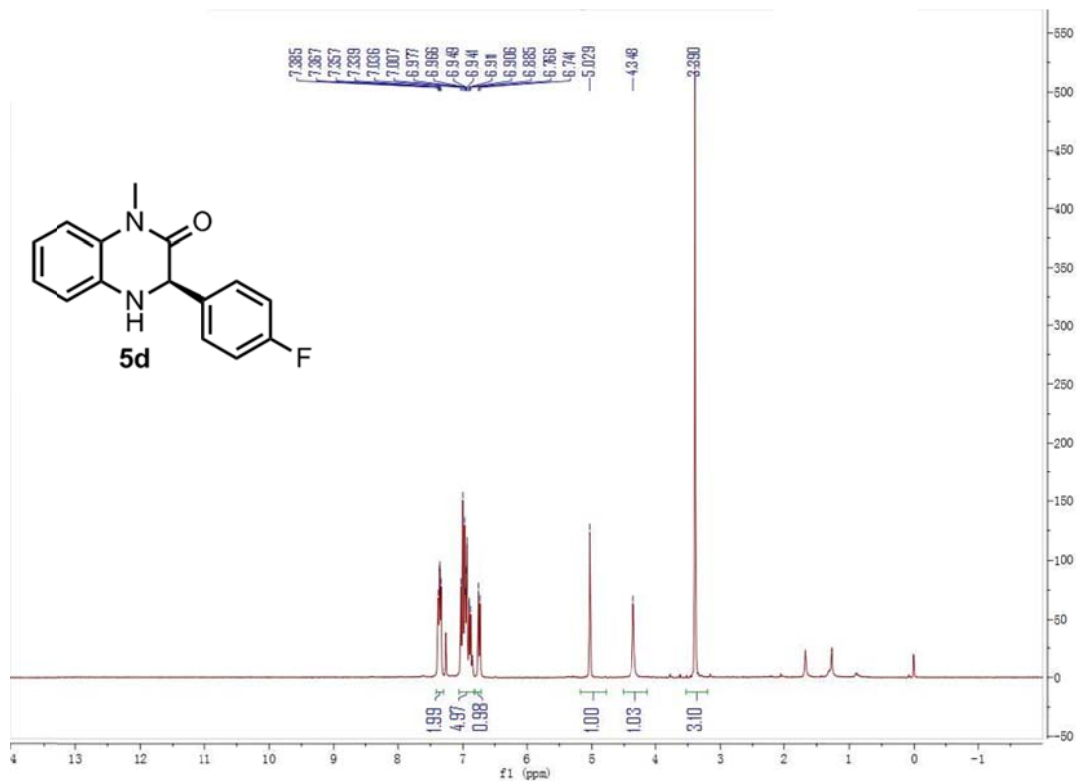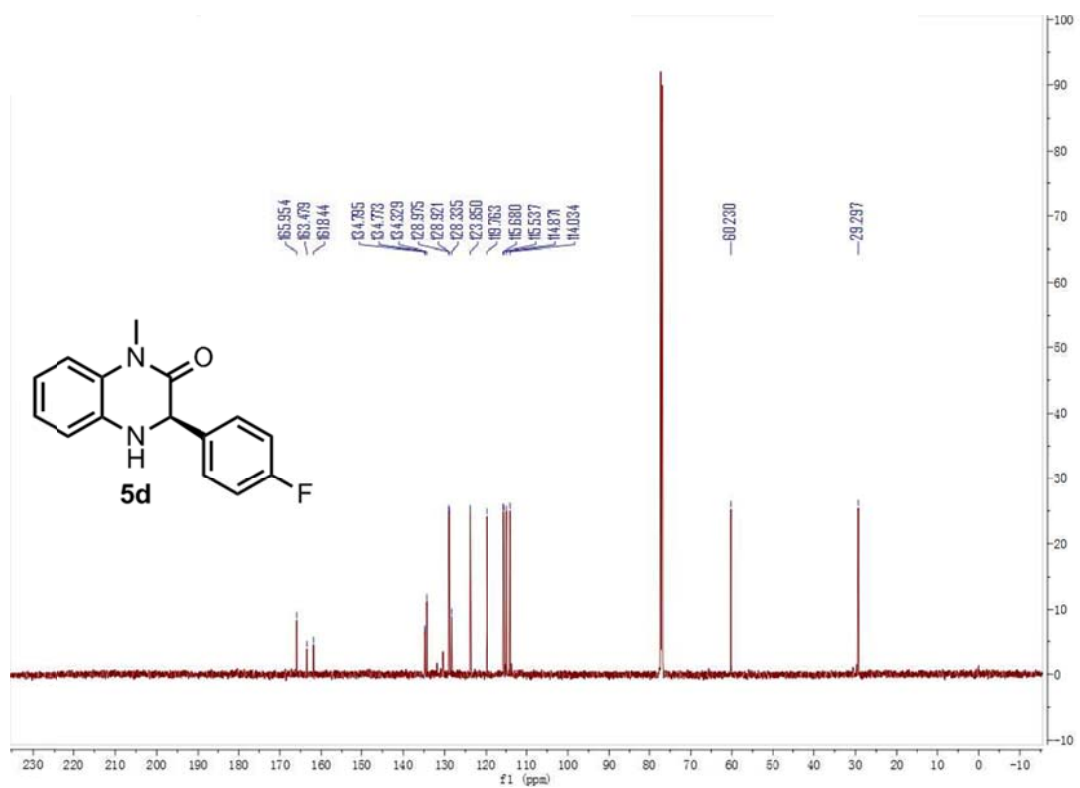

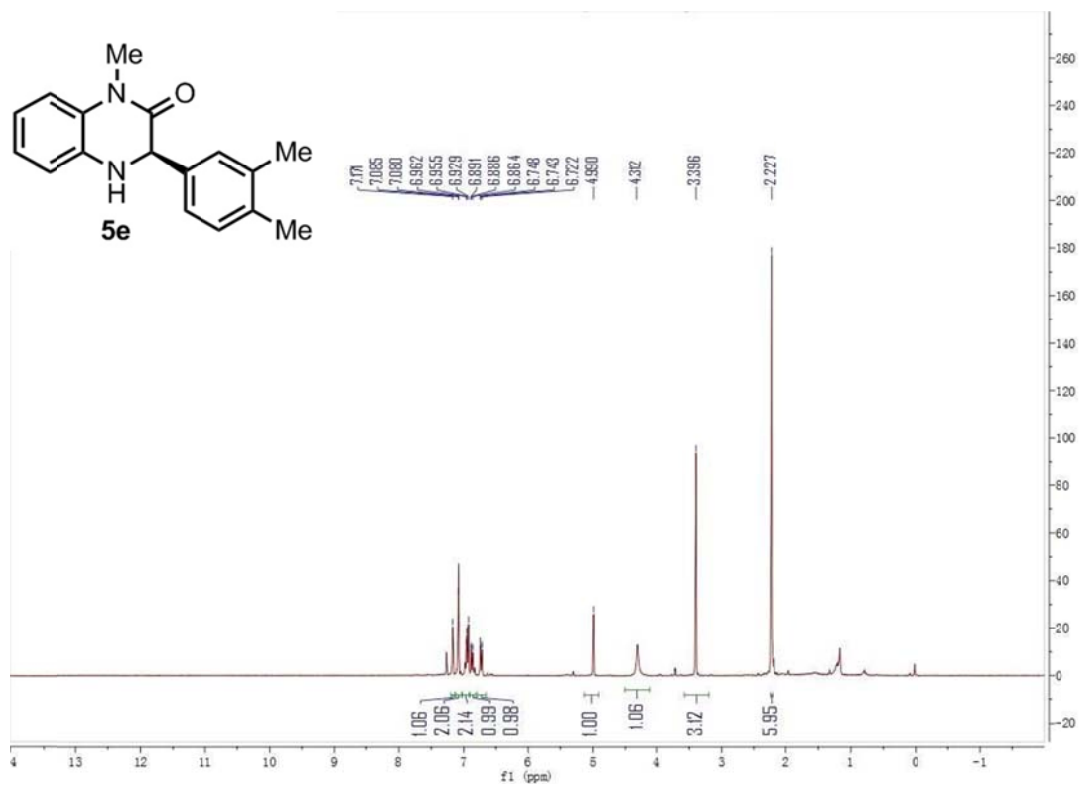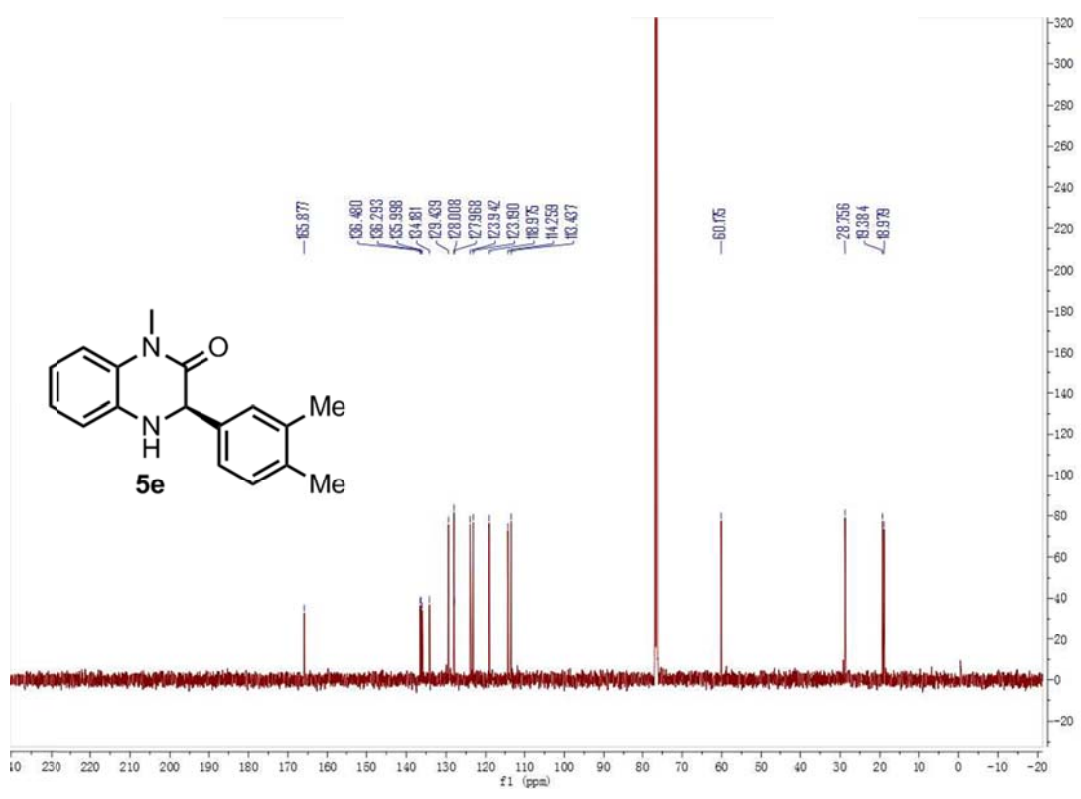

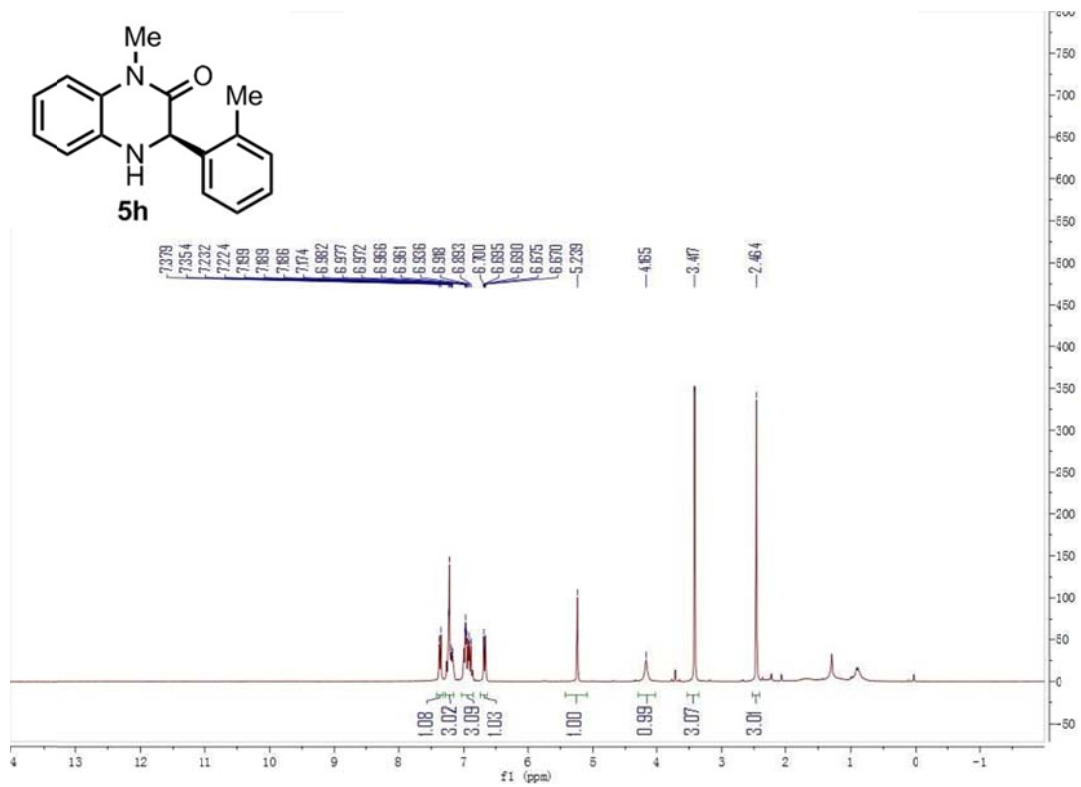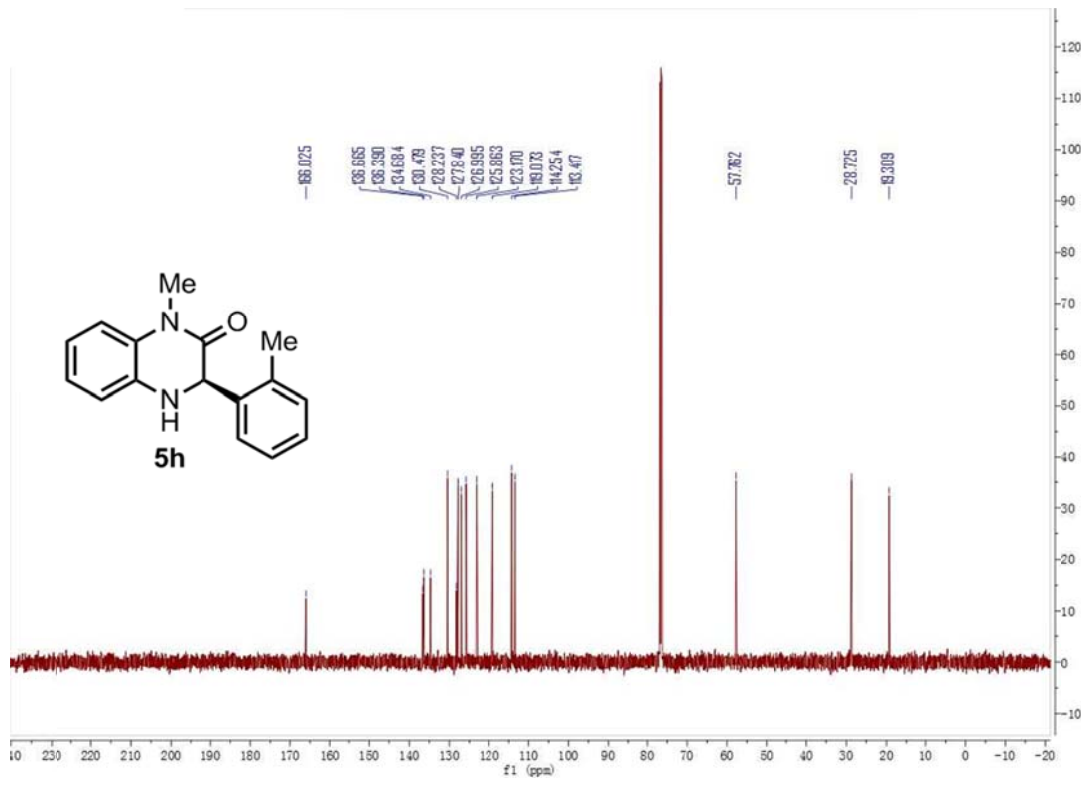



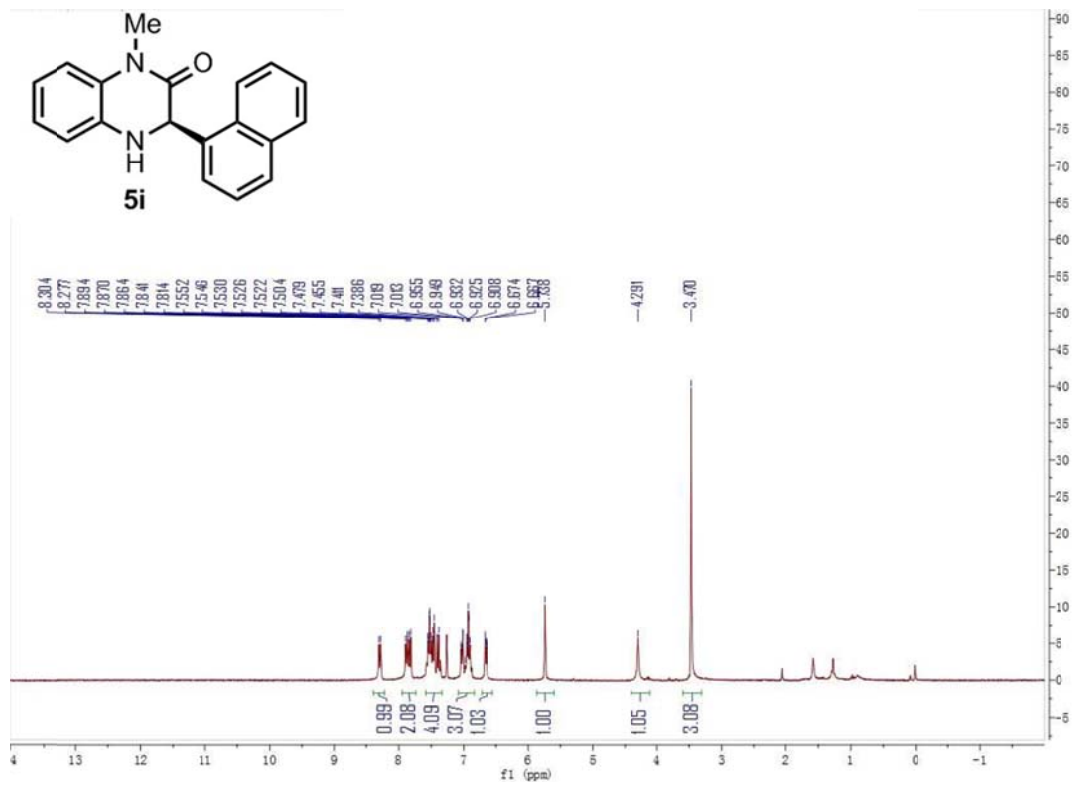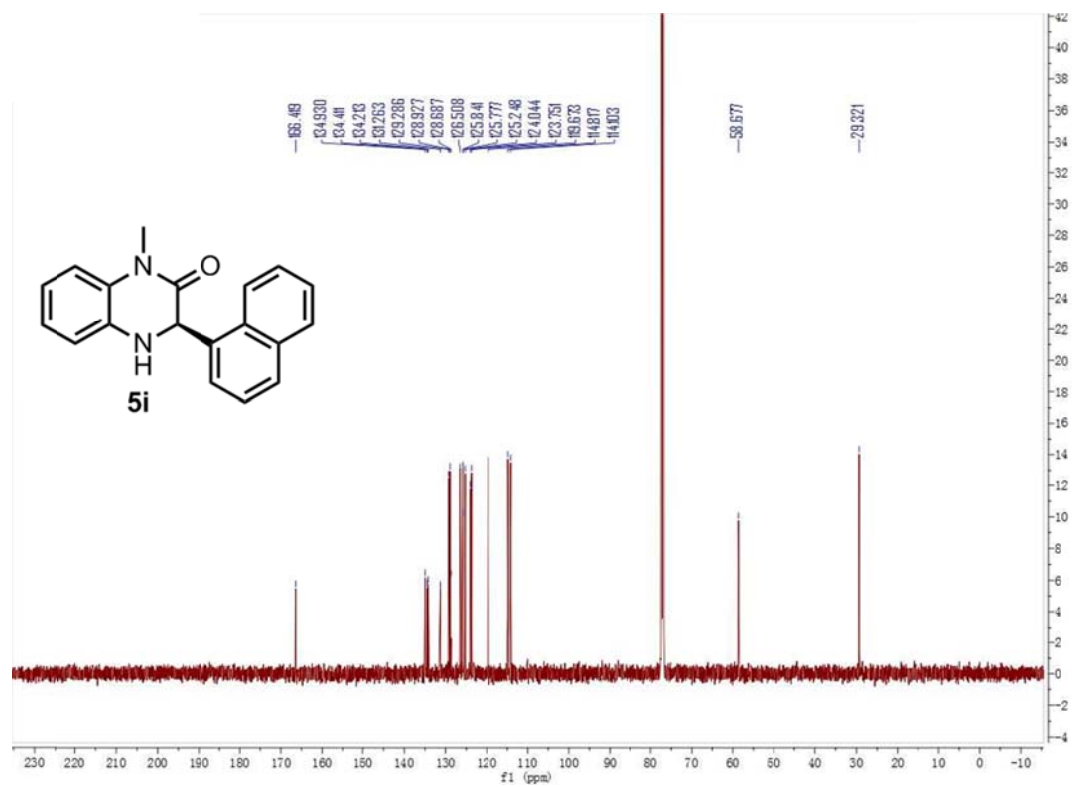

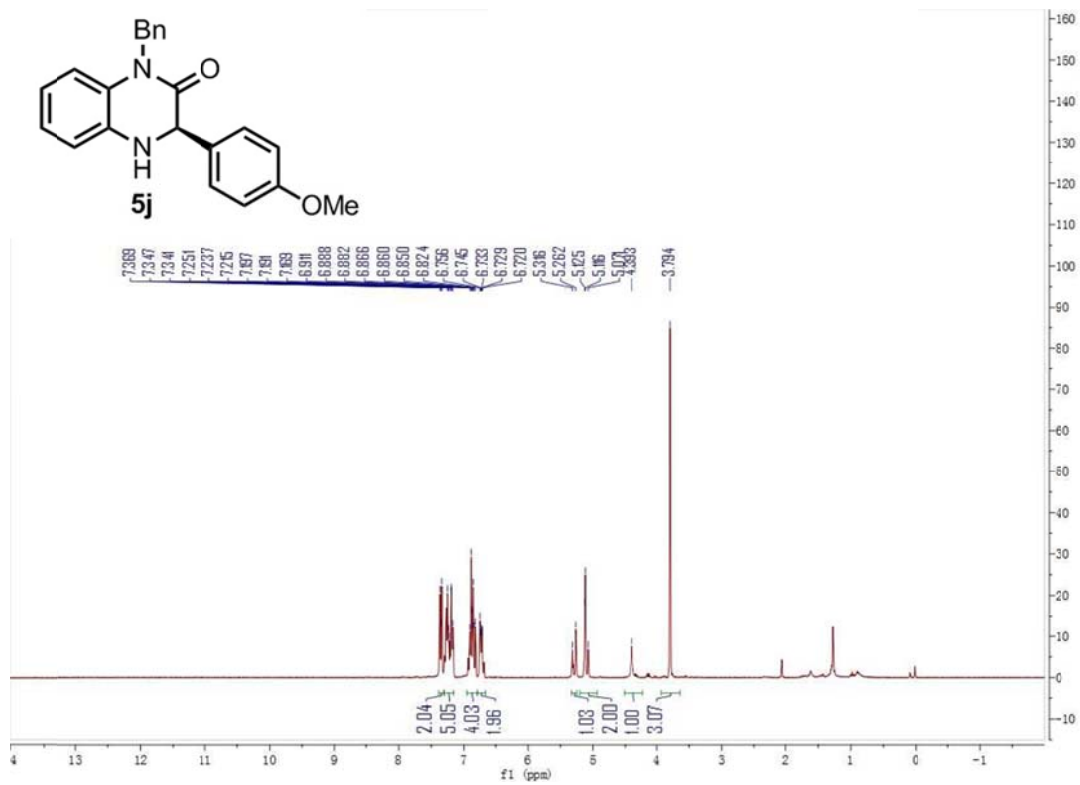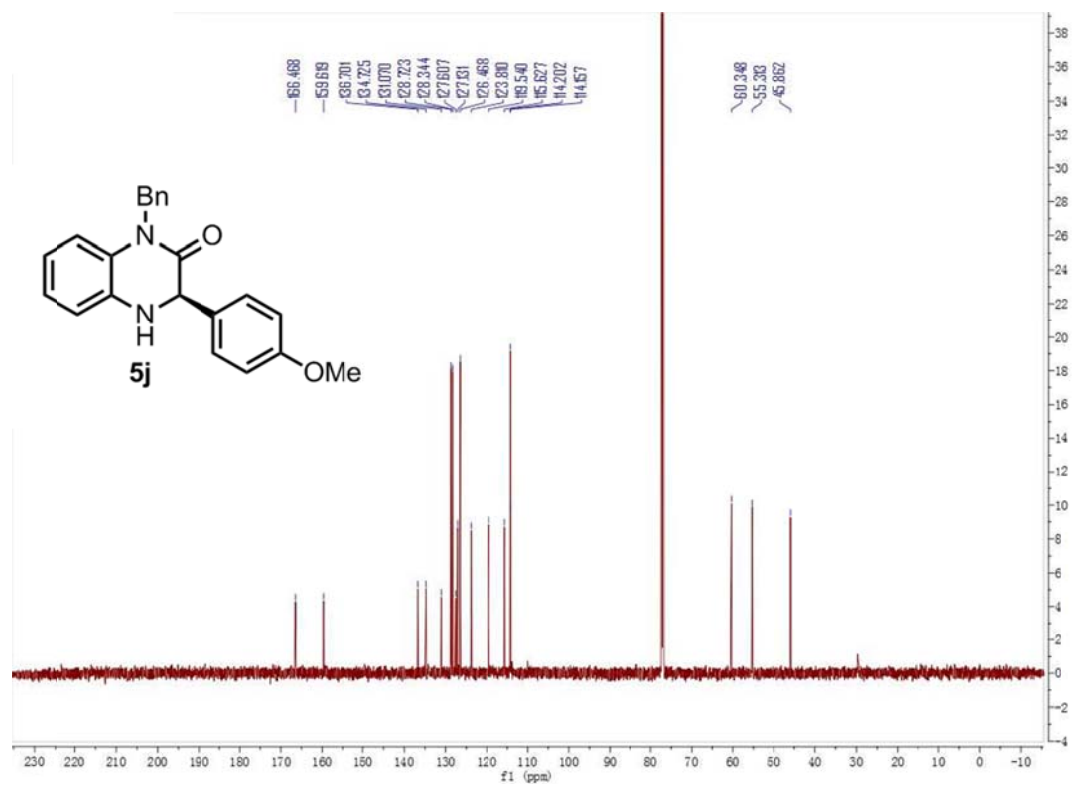

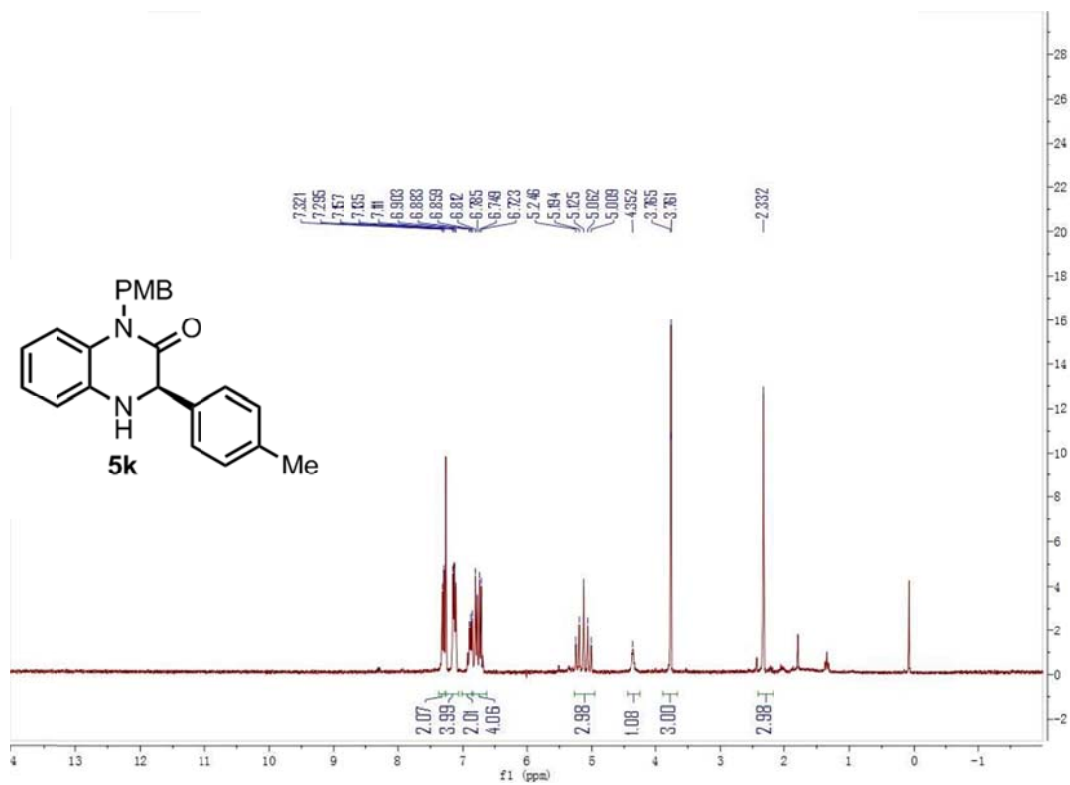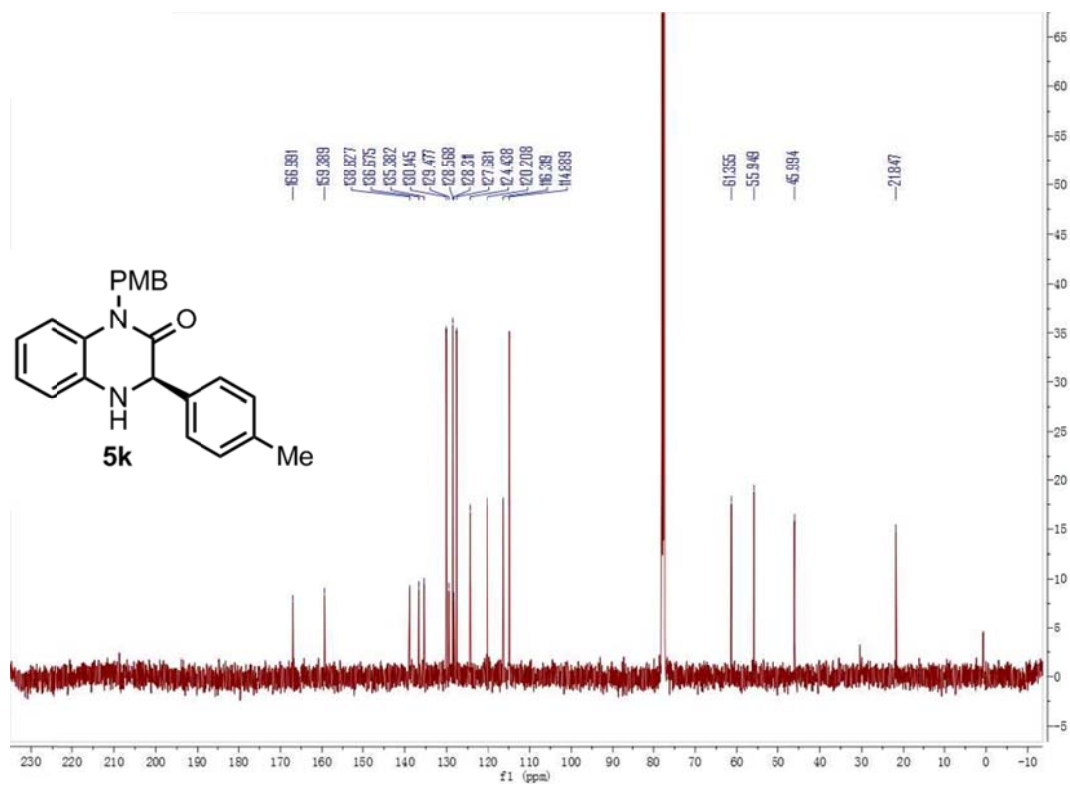

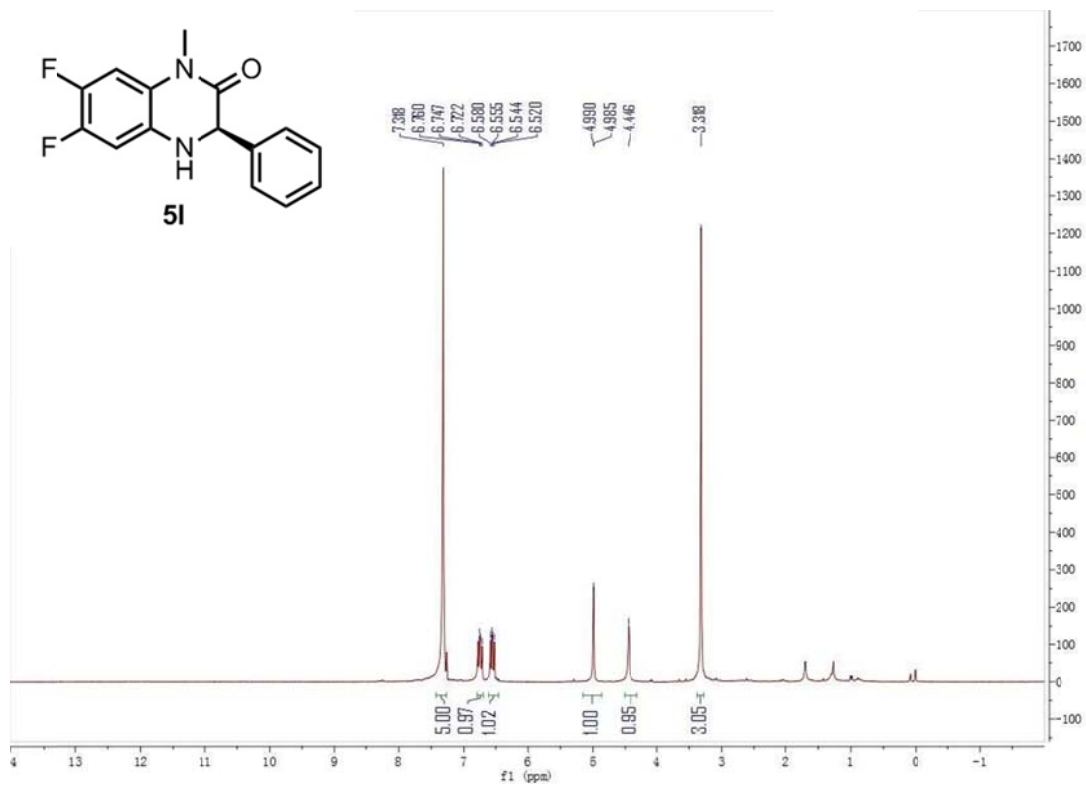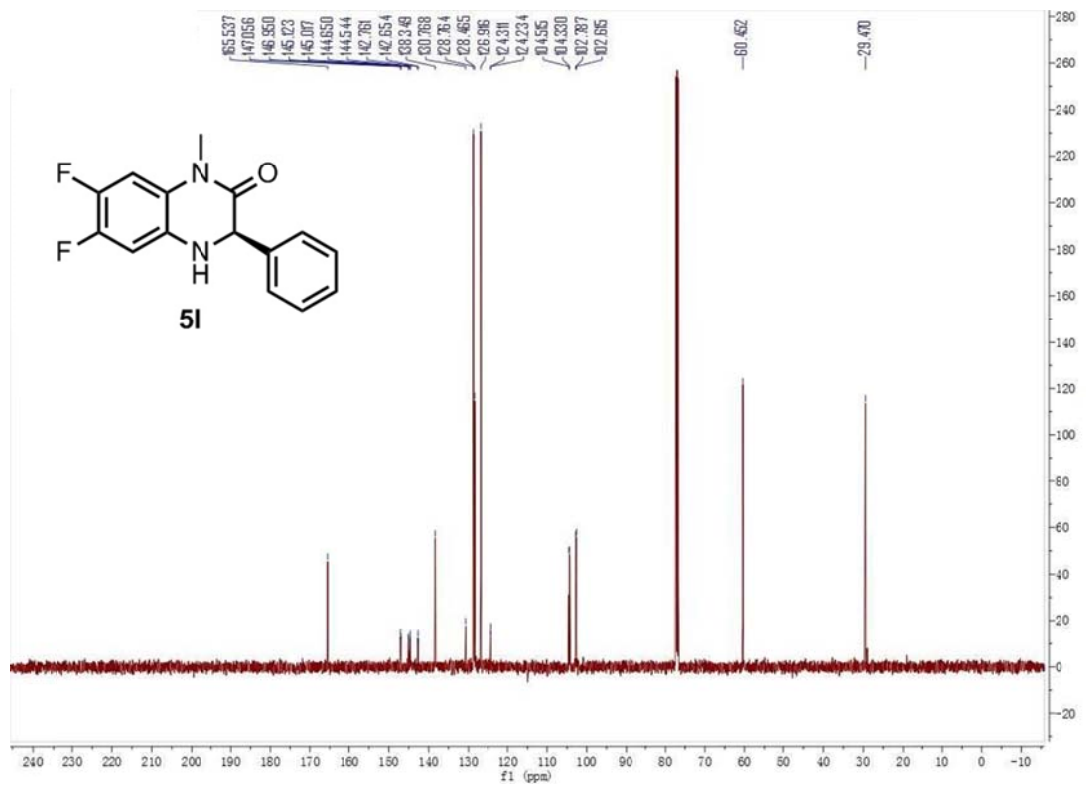

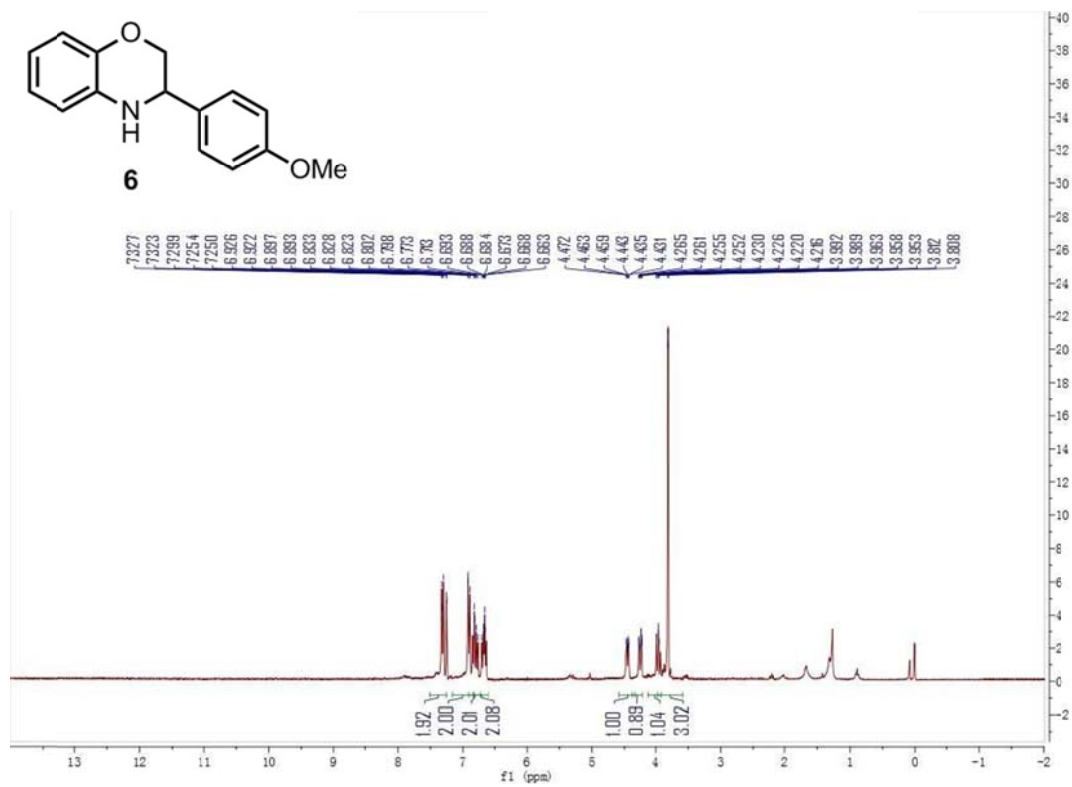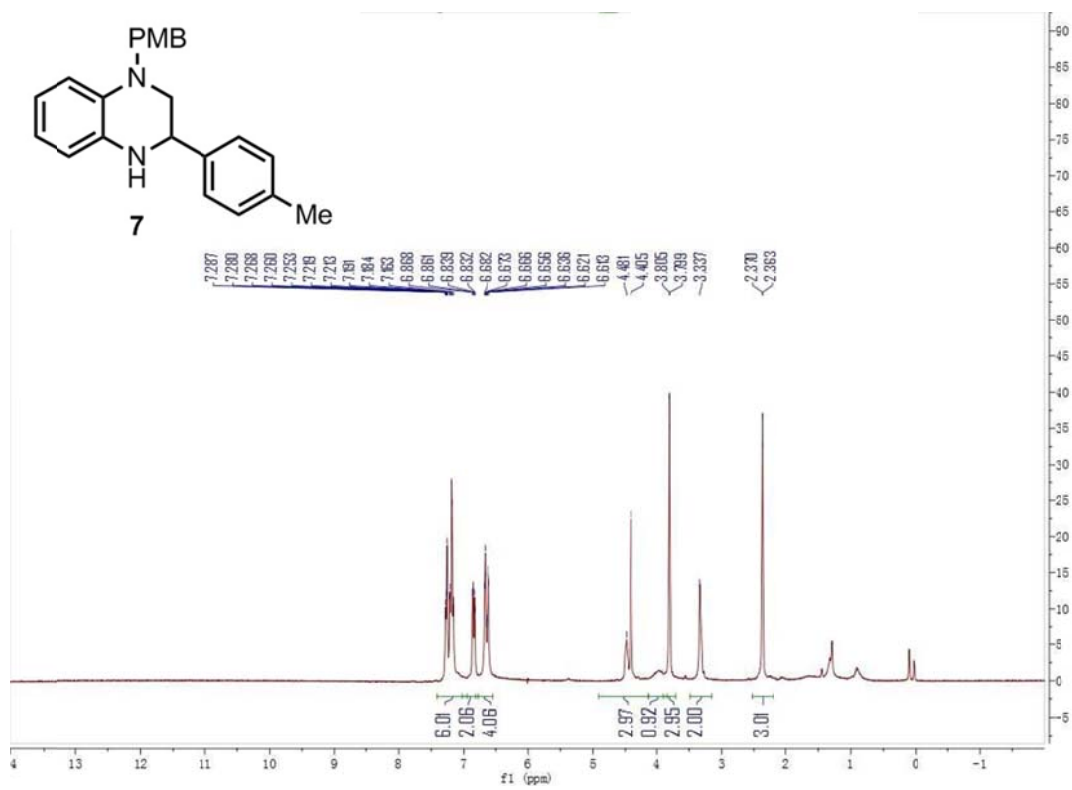

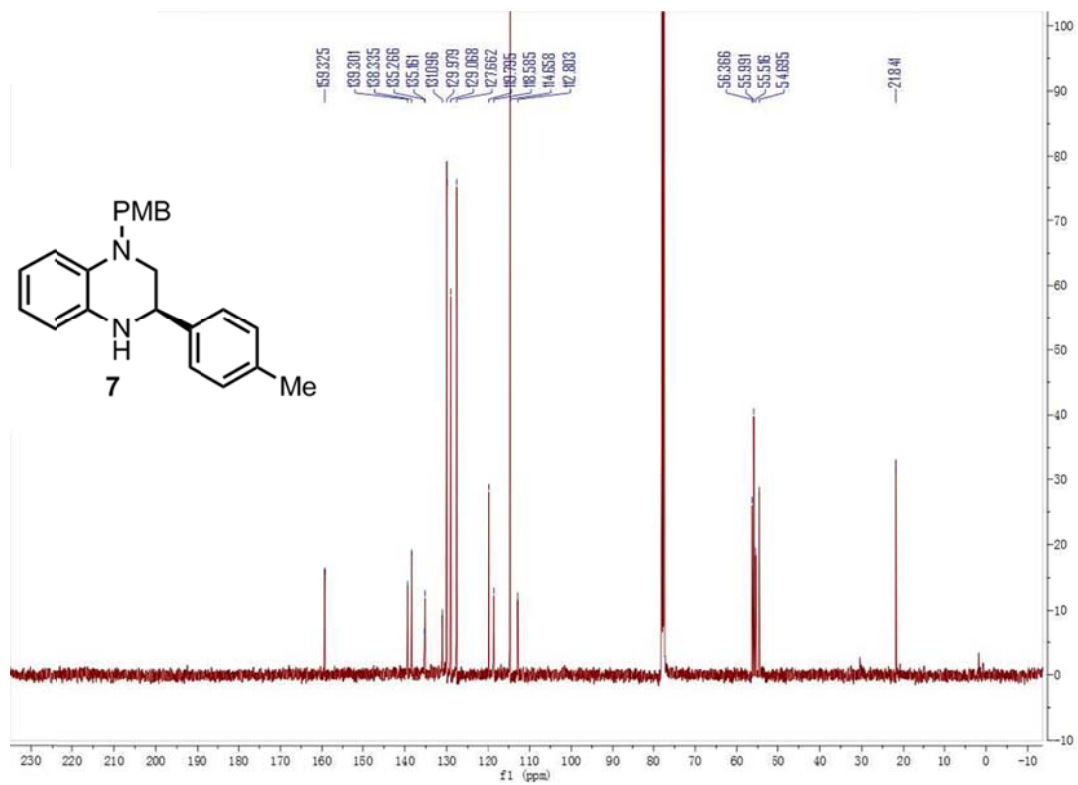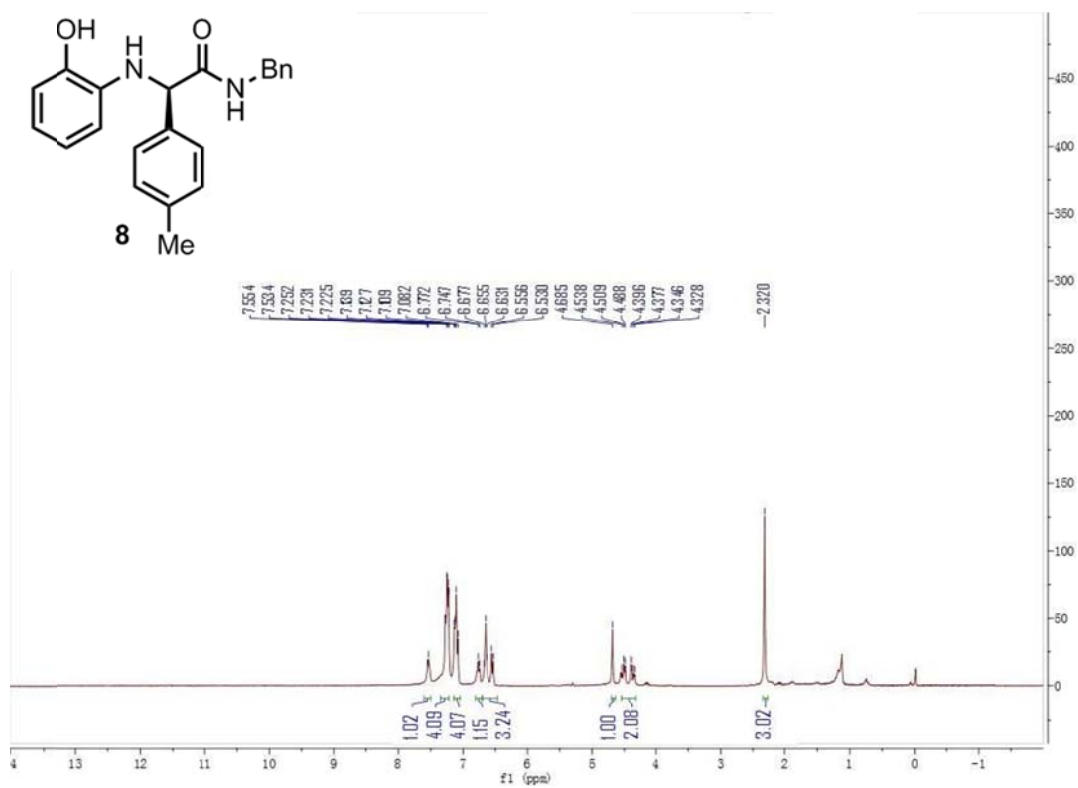

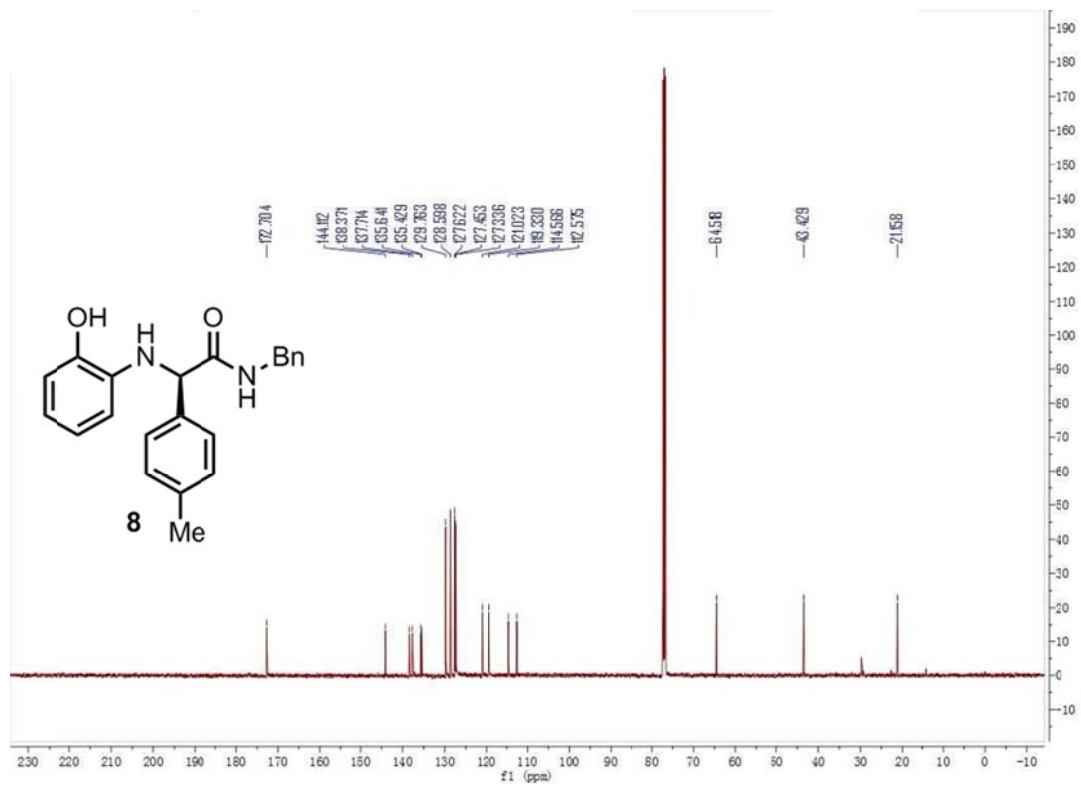

Supplement: c6qo00191b1.pdf [file c6qo00191b1.pdf]
